# Supplementary material for: Prevalence of syphilis among men who have sex with men: a global systematic review and meta-analysis from 2000–20
Source: PubMed Central journal article supplement (PMC9150735; doi:10.1016/s2214-109x(21)00221-7), 2021-07-08
Supplement: NIHMS1804808-supplement-Appendix.pdf [file NIHMS1804808-supplement-Appendix.pdf]

# THE LANCET

## Global Health

### Supplementary appendix

This appendix formed part of the original submission and has been peer reviewed. We post it as supplied by the authors.

Supplement to: Tsuboi M, Evans J, Davies EP, et al. Prevalence of syphilis among men who have sex with men: a global systematic review and meta-analysis from 2000–20. *Lancet Glob Health* 2021; published online July 8. [http://dx.doi.org/10.1016/S2214-109X\(21\)00221-7](http://dx.doi.org/10.1016/S2214-109X(21)00221-7).

## Supplementary appendix

Supplement to: Motoyuki Tsuboi, Jayne Evans, Ella P Davies, Jane Rowley, Eline L Korenromp, Tim Clayton, Melanie M Taylor, David Mabey, R Matthew Chico; “Prevalence of syphilis among men who have sex with men: A global systematic review and meta-analysis from 2000 to 2020.”

### Supplementary Figures

**Figure S1.** Histogram of pooled syphilis prevalence estimates among MSM by regions of the World Health Organization between 2000-2020

**Figure S2.** Histogram of pooled syphilis prevalence estimates among MSM by regions of the World Health Organization between 2000-2020 in five-year intervals

**Figure S3.** Forest plots of syphilis prevalence estimates among MSM by regions of the World Health Organization between 2000-2020

- Figure S3.1.** Americas
- Figure S3.2.** Africa
- Figure S3.3.** Eastern Mediterranean
- Figure S3.4.** Europe
- Figure S3.5.** South-East Asia
- Figure S3-6a.** Western Pacific between 2000-2009
- Figure S3-6b.** Western Pacific between 2010-2020

**Figure S4.** Histogram of pooled syphilis prevalence estimates among MSM by regions of the Sustainable Development Goals between 2000-2020 in five-year intervals

**Figure S5.** Forest plots of syphilis prevalence estimates among MSM by regions of the Sustainable Development Goals between 2000-2020

- Figure S5.1.** Australia and New Zealand
- Figure S5.2.** Central and Southern Asia
- Figure S5.3a.** Eastern and South-Eastern Asia between 2000-2009
- Figure S5.3b.** Eastern and South-Eastern Asia between 2010-2020
- Figure S5.4.** Europe and Northern America
- Figure S5.5.** Latin America and the Caribbean
- Figure S5.6.** Northern Africa and Western Asia
- Figure S5.7.** Oceania (excluding Australia and New Zealand)
- Figure S5.8.** Sub-Saharan Africa

## Supplementary Tables

[Table S1](#). PRISMA Checklist

[Table S2](#). Sensitivity and specificity of syphilis diagnostic assays used in individual studies

[Table S3](#). Pooled syphilis prevalence estimates among MSM in regions of the World Health Organization between 2000-2020

[Table S4](#). Pooled syphilis prevalence estimates among MSM in regions of the World Health Organization between 2000-2020 in five-year intervals

[Table S5](#). Sensitivity and specificity of HIV diagnostic assays used in individual studies

[Table S6](#). Pooled syphilis prevalence estimates among MSM in regions of the Sustainable Development Goals between 2000-2020 in five-year intervals

[Table S7](#). Pooled syphilis prevalence estimates among MSM by country between 2000-2020

[Table S8](#). Individual studies identified by systematic review containing syphilis prevalence estimates among MSM

## Supplementary Text

[Text S1](#). Search terms

[Text S2](#). Data extraction form

[Text S3](#). Correction of observed prevalence

[Text S4](#). Appraisal tool for cross-sectional studies (AXIS)

[Text S5](#). References

**Figure S1.** Histogram of pooled syphilis prevalence estimates among MSM by regions of the World Health Organization between 2000-2020

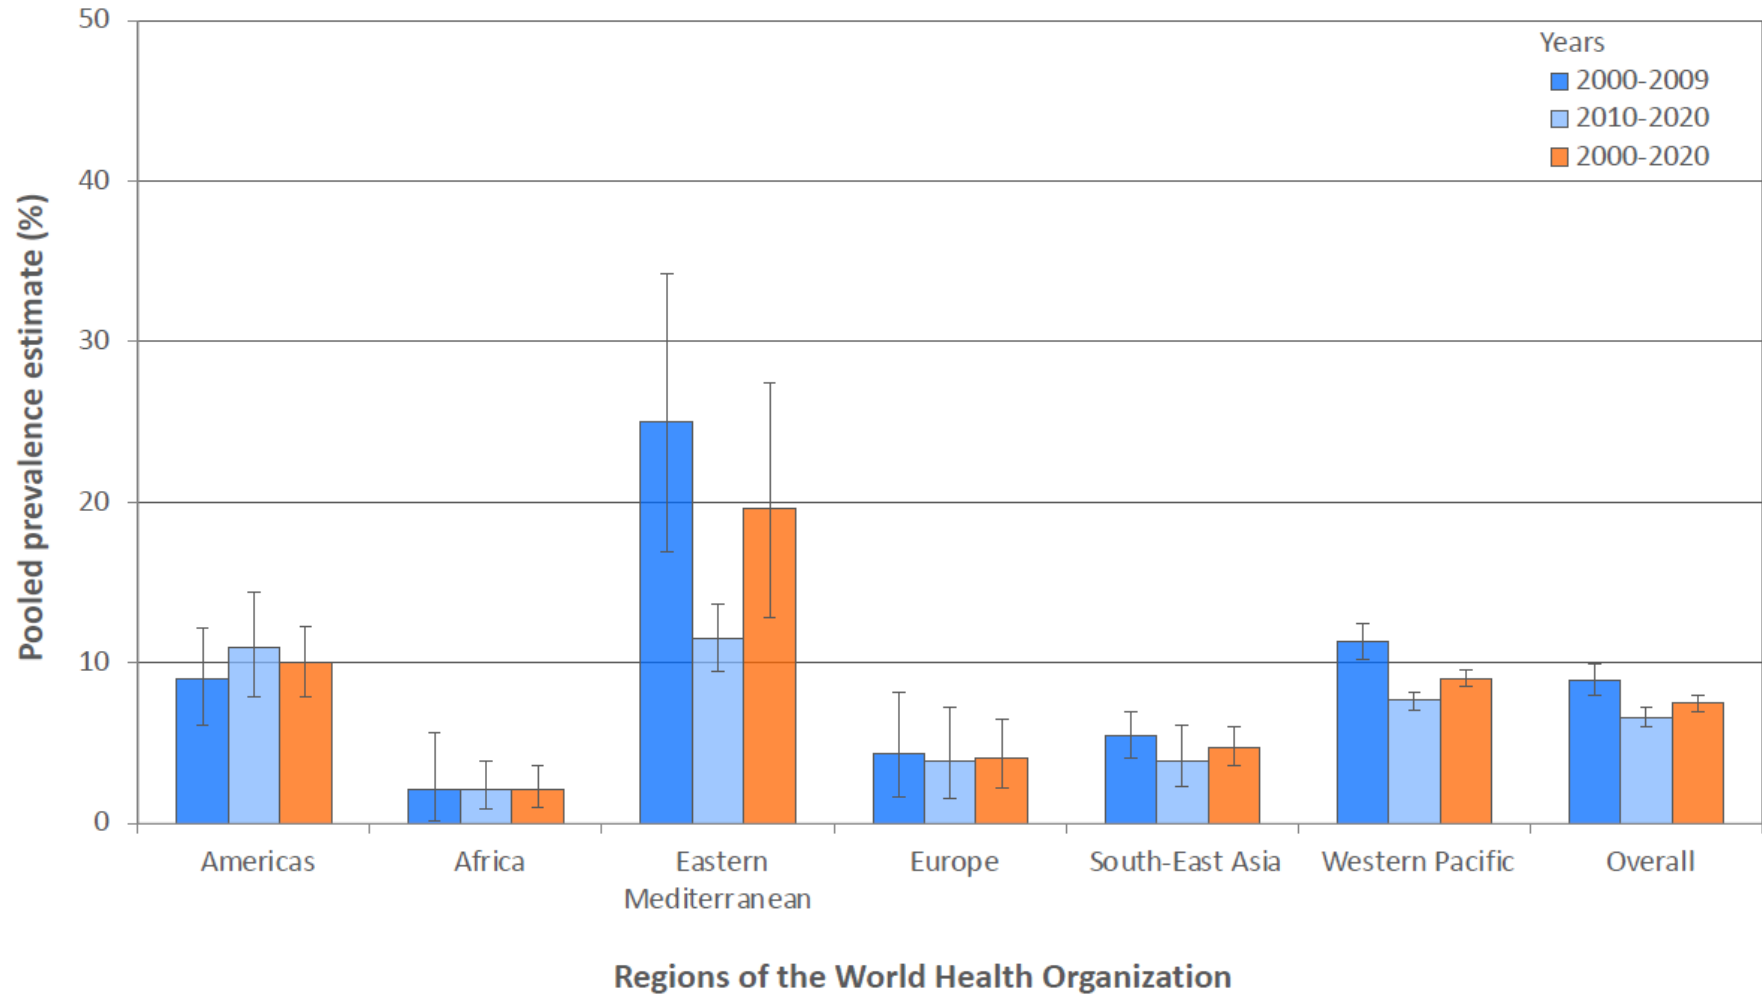



**Figure S2.** Histogram of pooled syphilis prevalence estimates among MSM by regions of the World Health Organization between 2000-2020 in five-year intervals

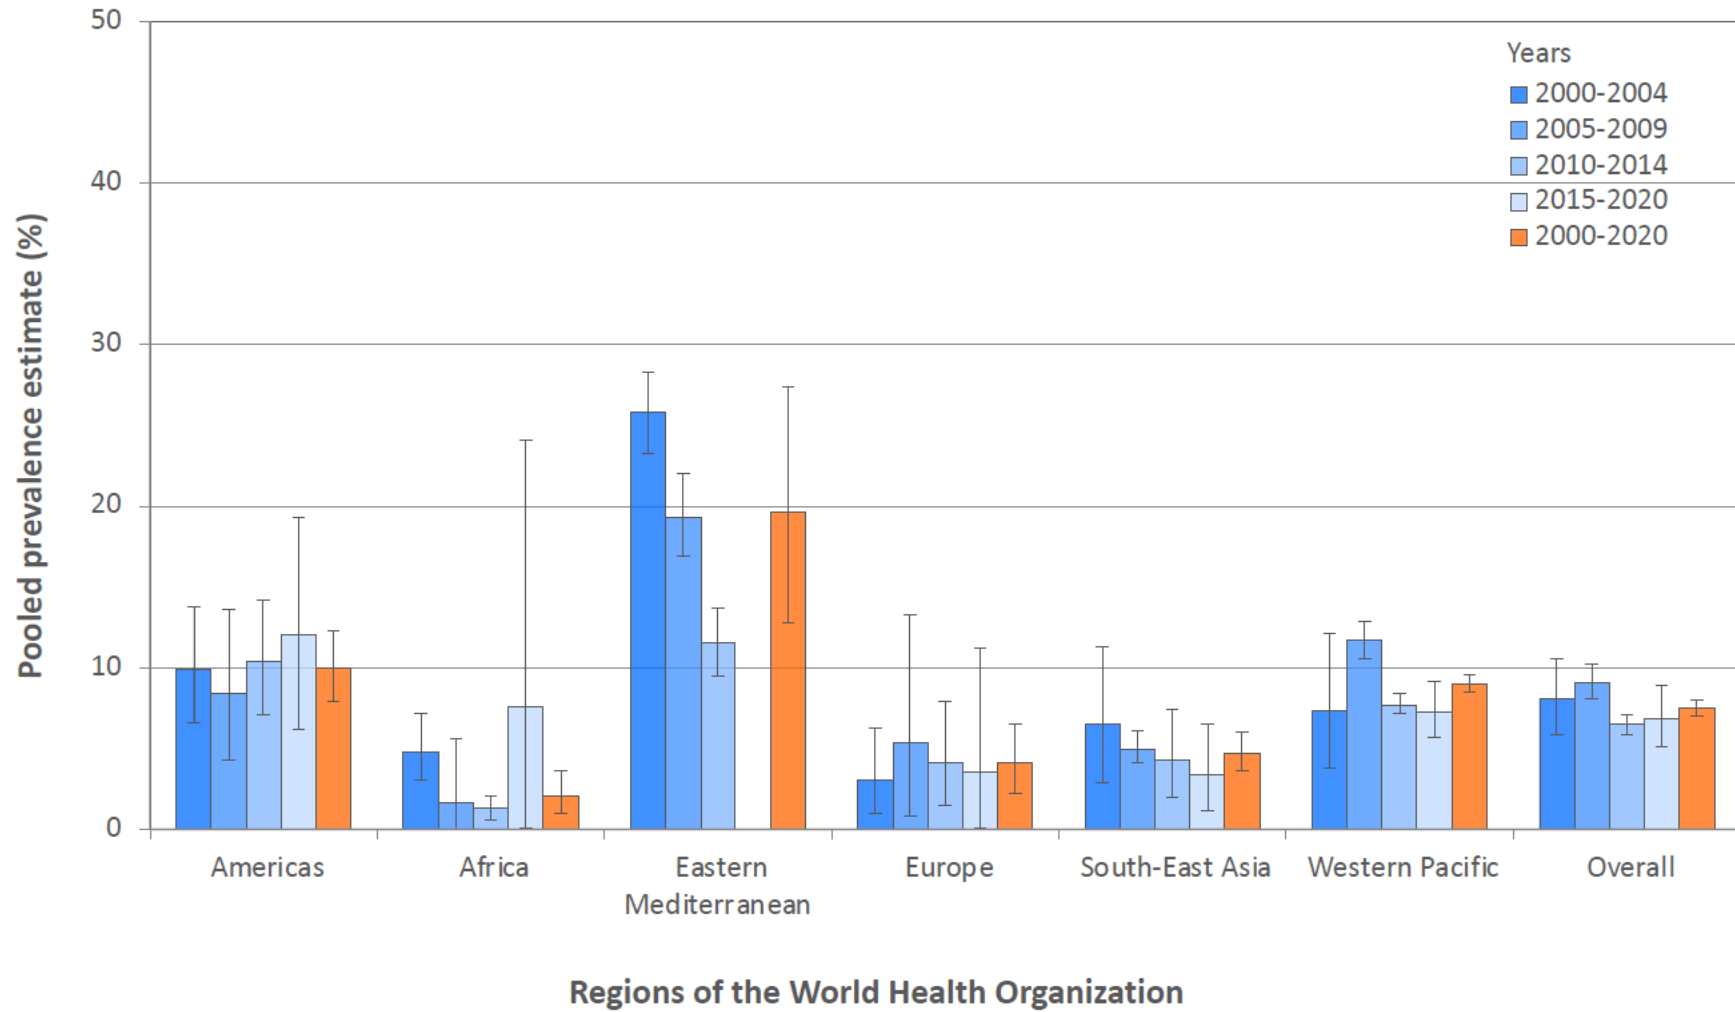

**Figure S3.1.** Americas WHO Region: Pooled syphilis prevalence estimates among MSM between 2000-2020

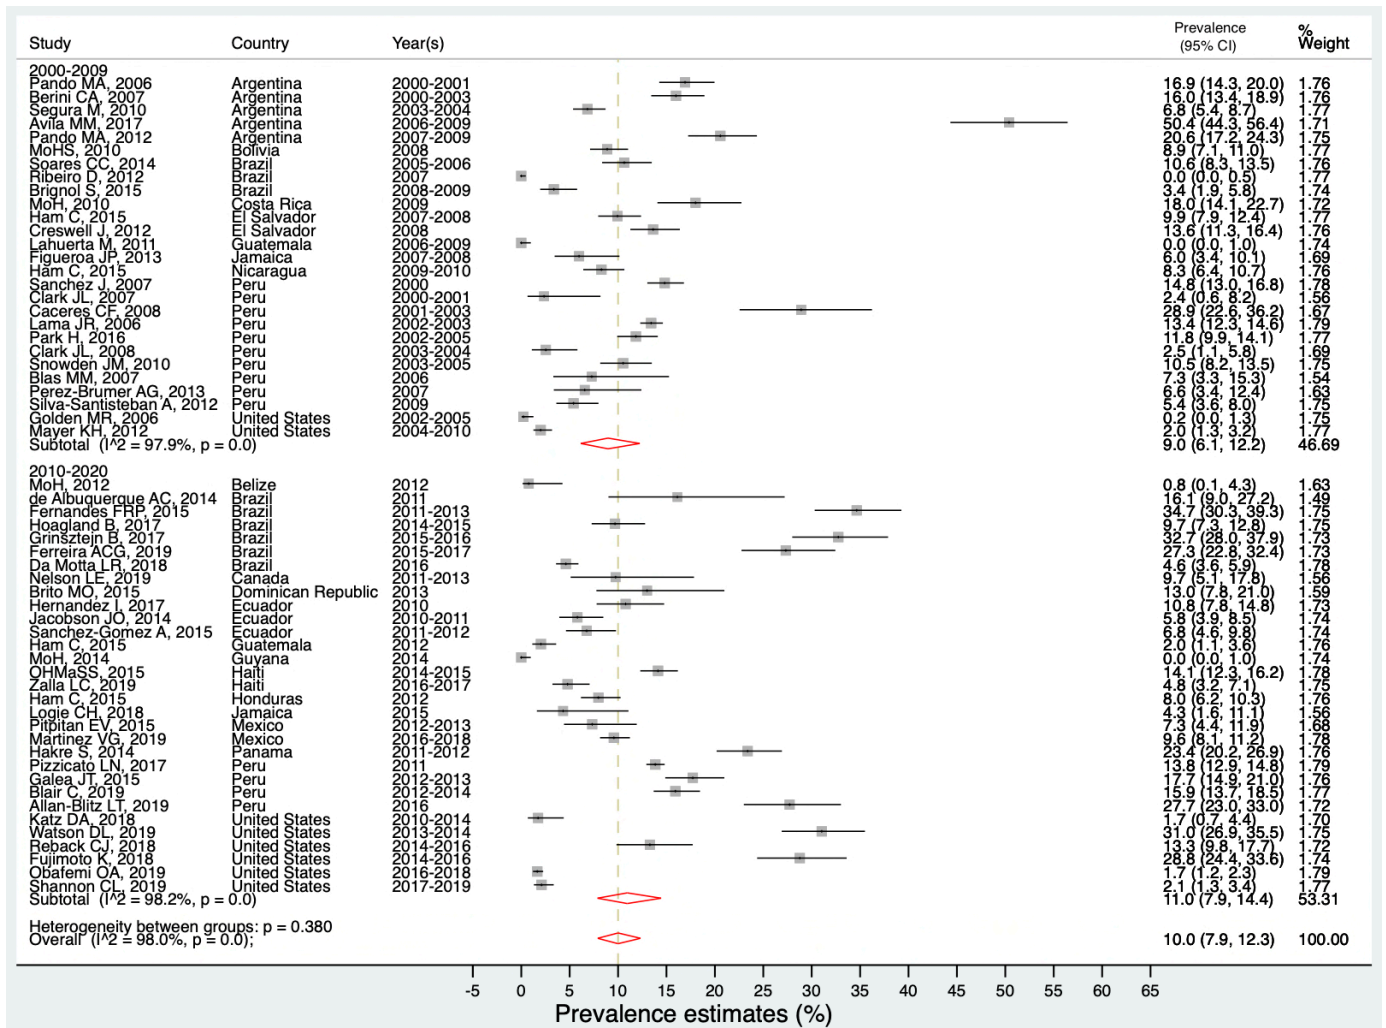

Diamonds indicate pooled mean prevalence estimates; the extremes of the diamonds indicate 95% CIs

Figure S3.2. Africa WHO Region: Pooled syphilis prevalence estimates among MSM between 2000-2020

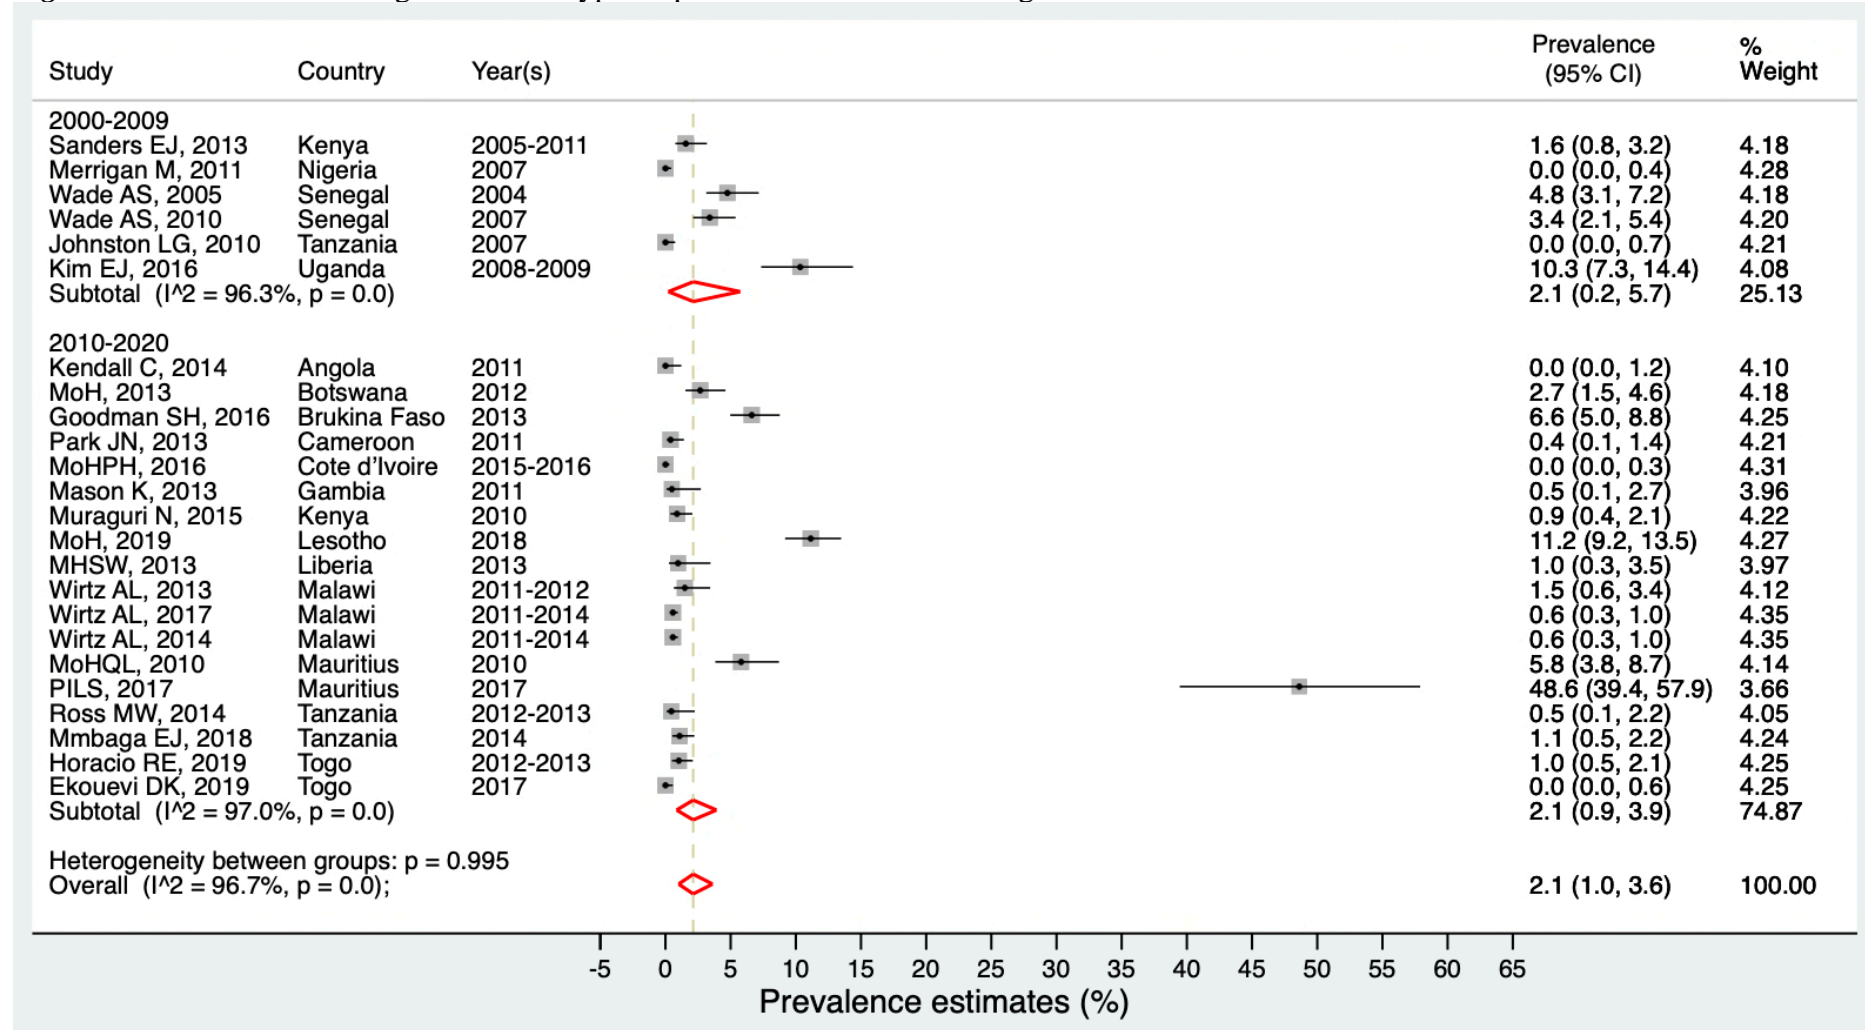

Diamonds indicate pooled mean prevalence estimates; the extremes of the diamonds indicate 95% CIs

**Figure S3.3.** Eastern Mediterranean WHO Region: Pooled syphilis prevalence estimates among MSM between 2000-2020

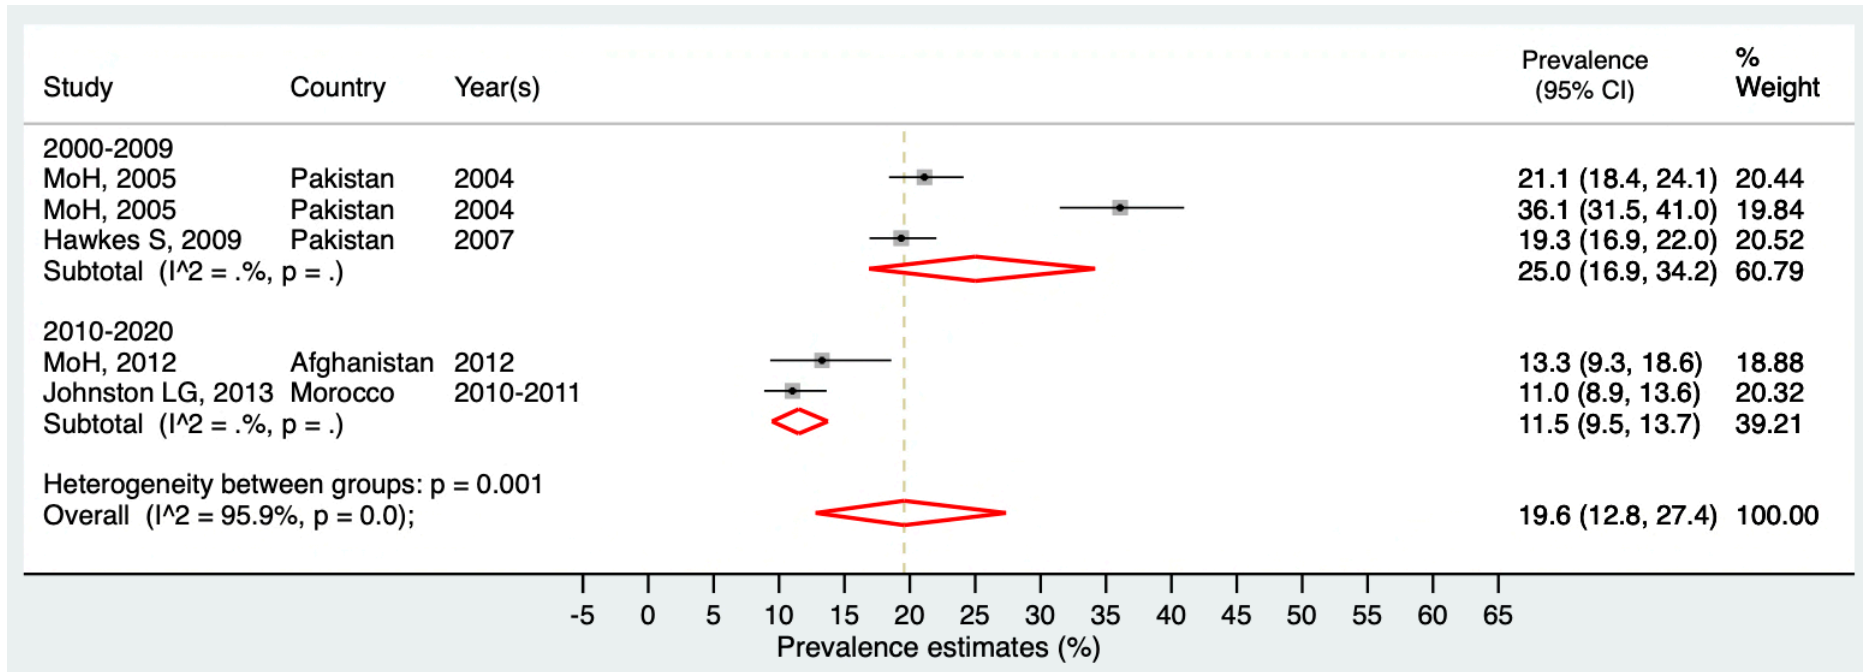

Diamonds indicate pooled mean prevalence estimates; the extremes of the diamonds indicate 95% CIs

Figure S3.4. Europe WHO Region: Pooled syphilis prevalence estimates among MSM between 2000-2020

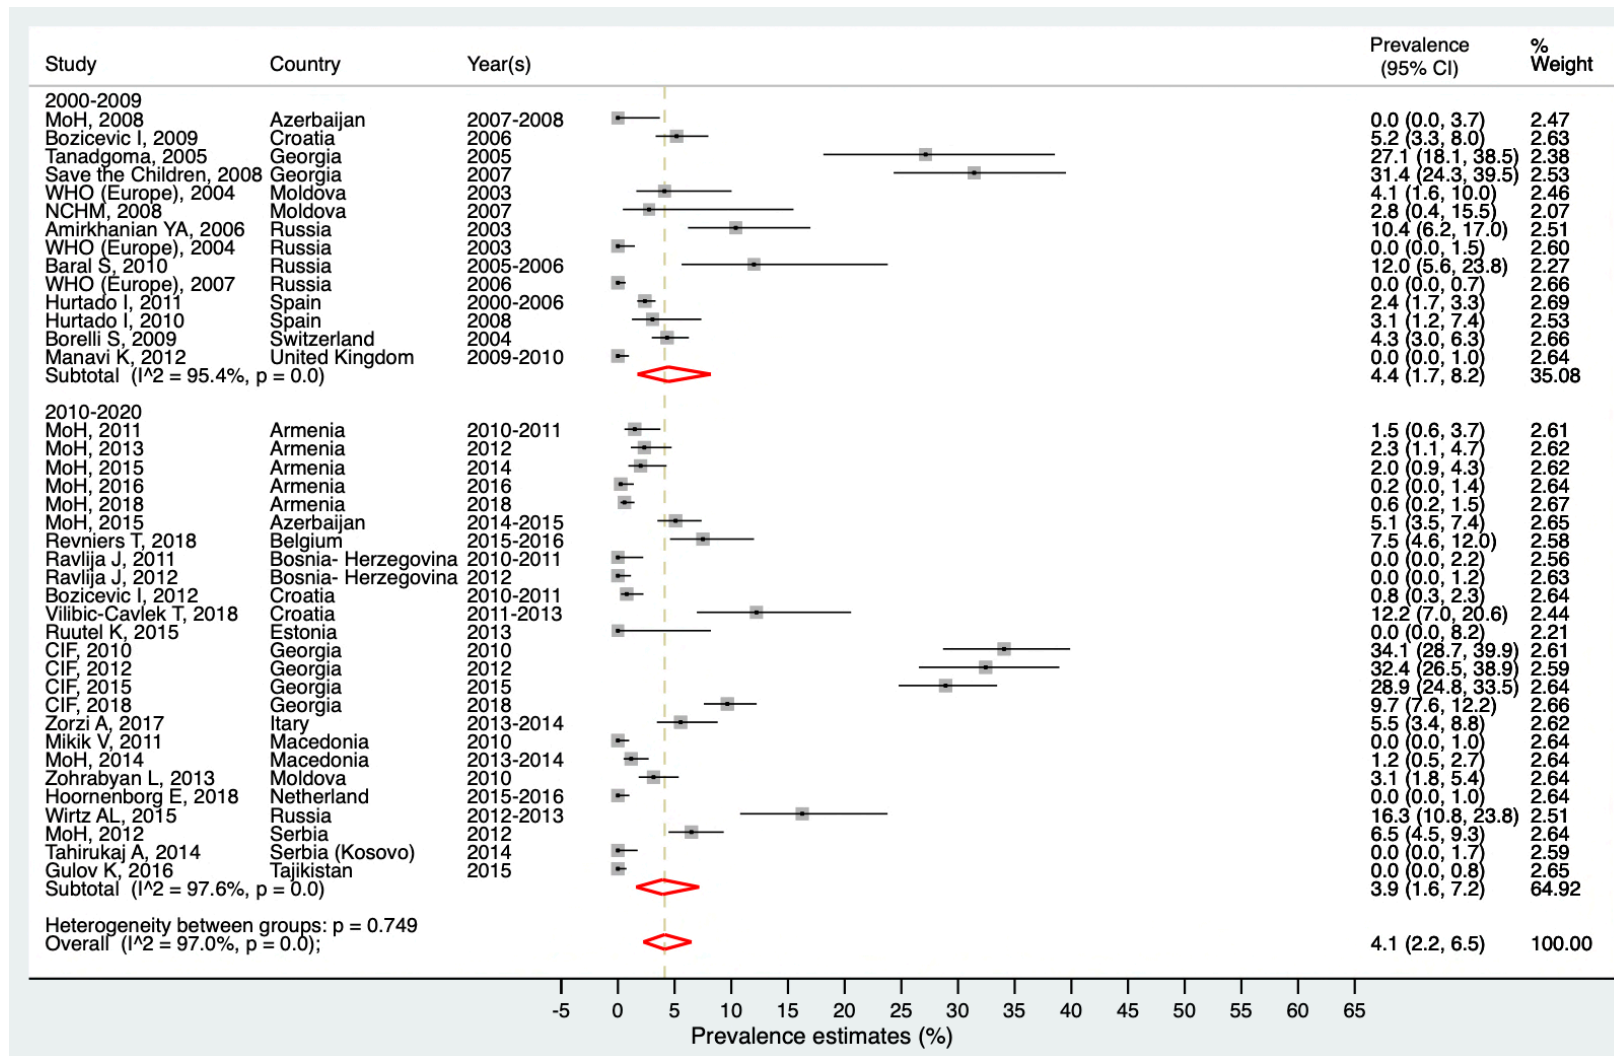

Diamonds indicate pooled mean prevalence estimates; the extremes of the diamonds indicate 95% CIs

**Figure S3.5.** South-East Asia WHO Region: Pooled syphilis prevalence estimates among MSM between 2000-2020

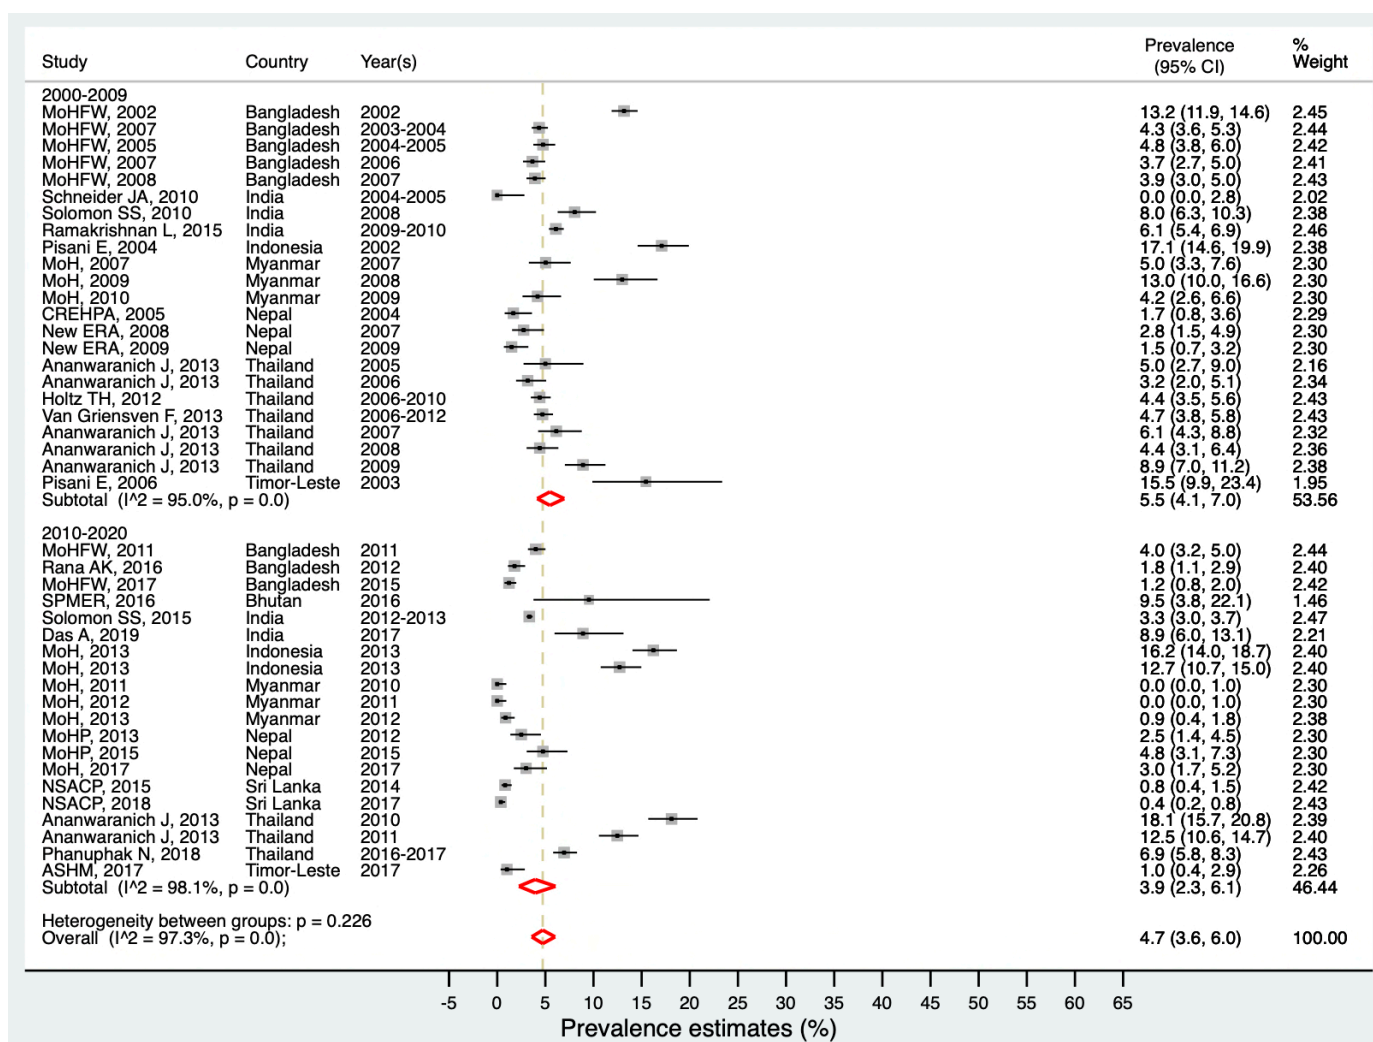

Diamonds indicate pooled mean prevalence estimates; the extremes of the diamonds indicate 95% CIs



**Figure S3-6a.** Western Pacific WHO Region: Pooled syphilis prevalence estimates among MSM between 2000-2009

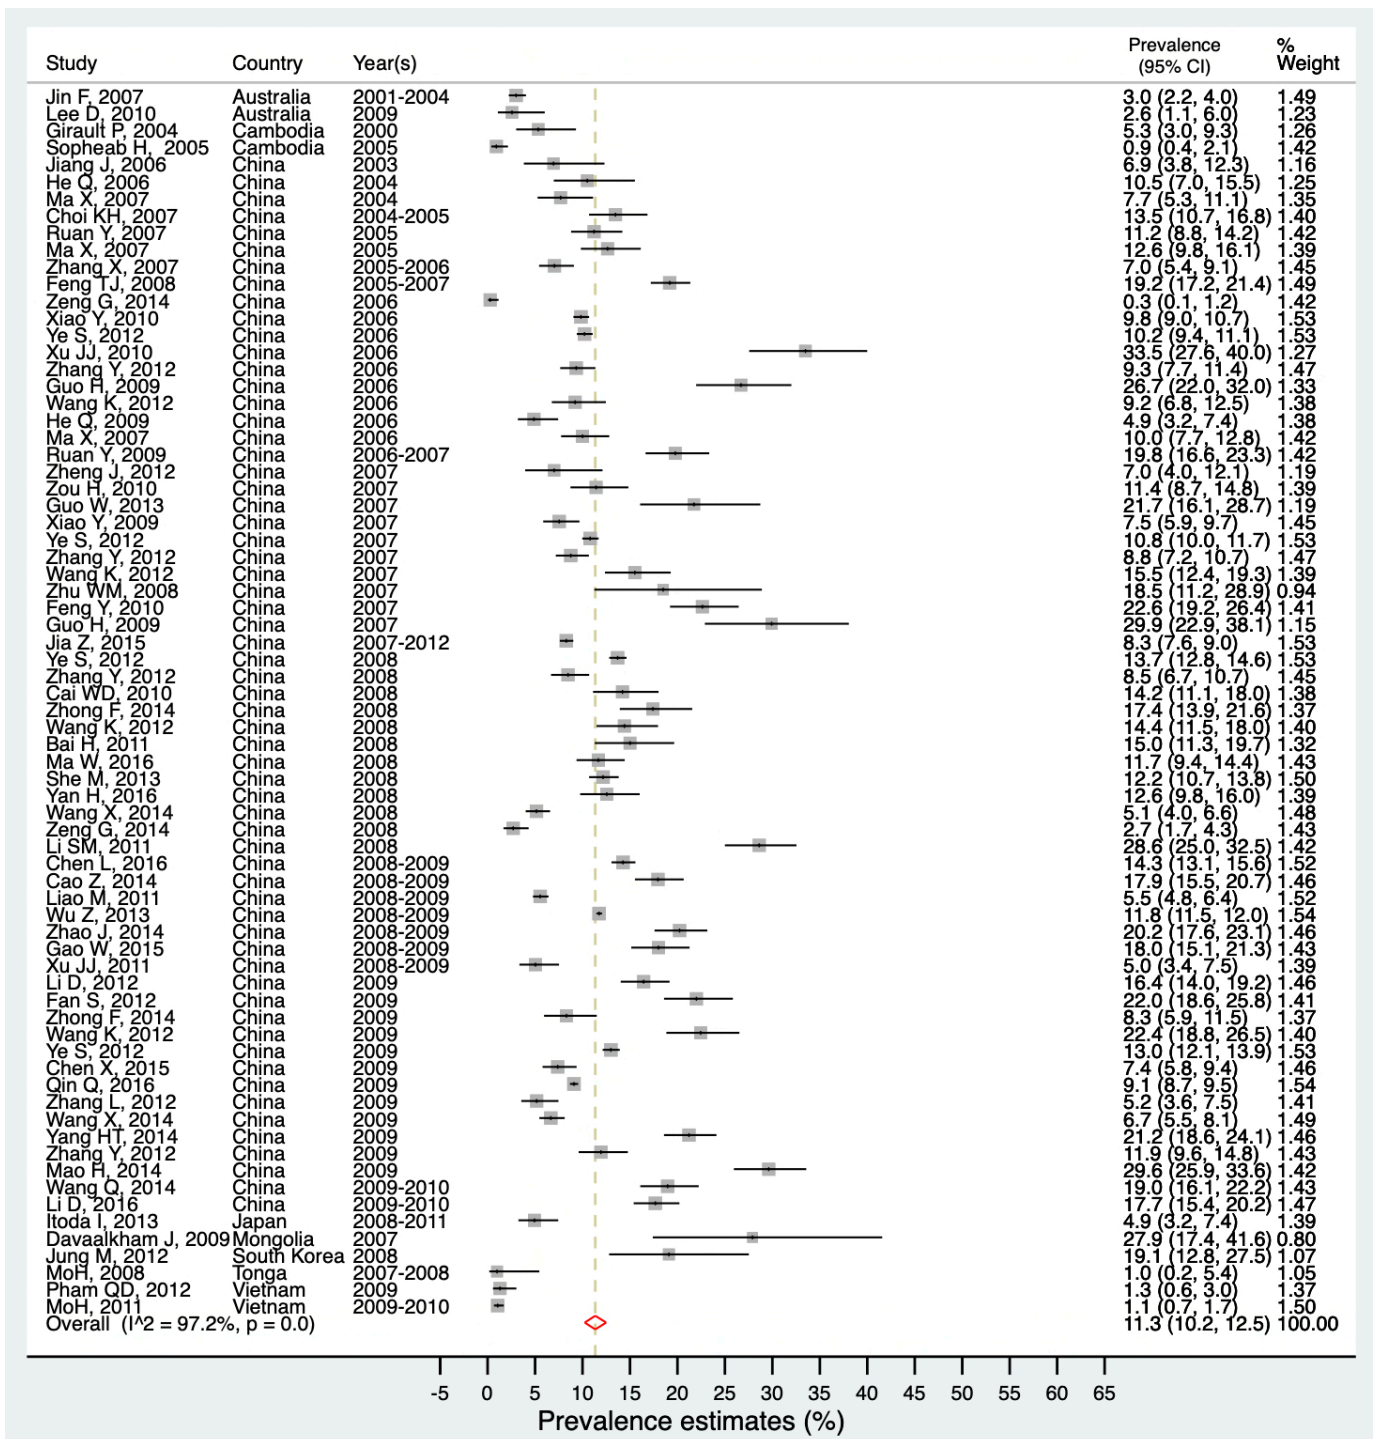

Diamonds indicate pooled mean prevalence estimates; the extremes of the diamonds indicate 95% CIs

**Figure S3-6b.** Western Pacific WHO Region: Pooled syphilis prevalence estimates among MSM between 2010-2020

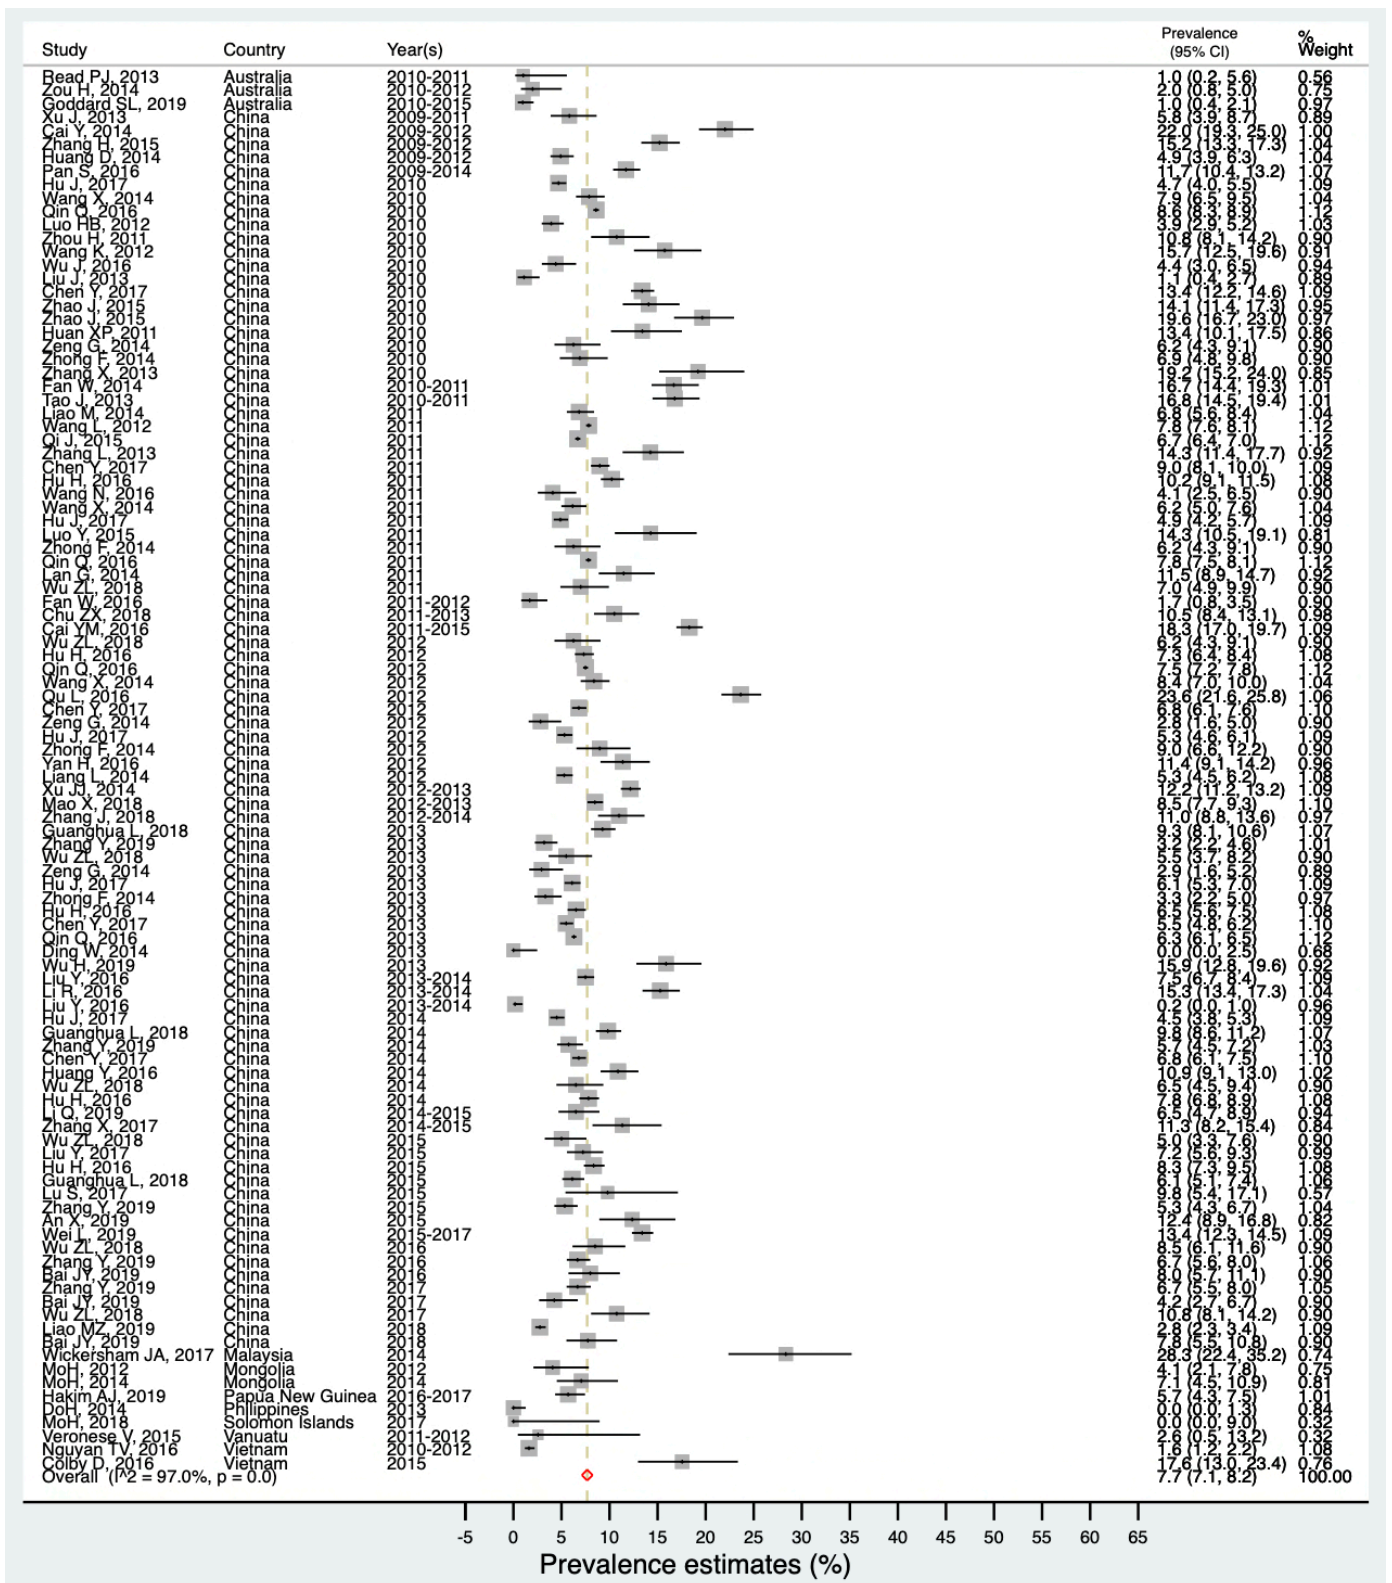

Diamonds indicate pooled mean prevalence estimates; the extremes of the diamonds indicate 95% CIs



**Figure S4.** Histogram of pooled syphilis prevalence estimates among MSM by regions of the Sustainable Development Goals between 2000-2020 in five-year intervals

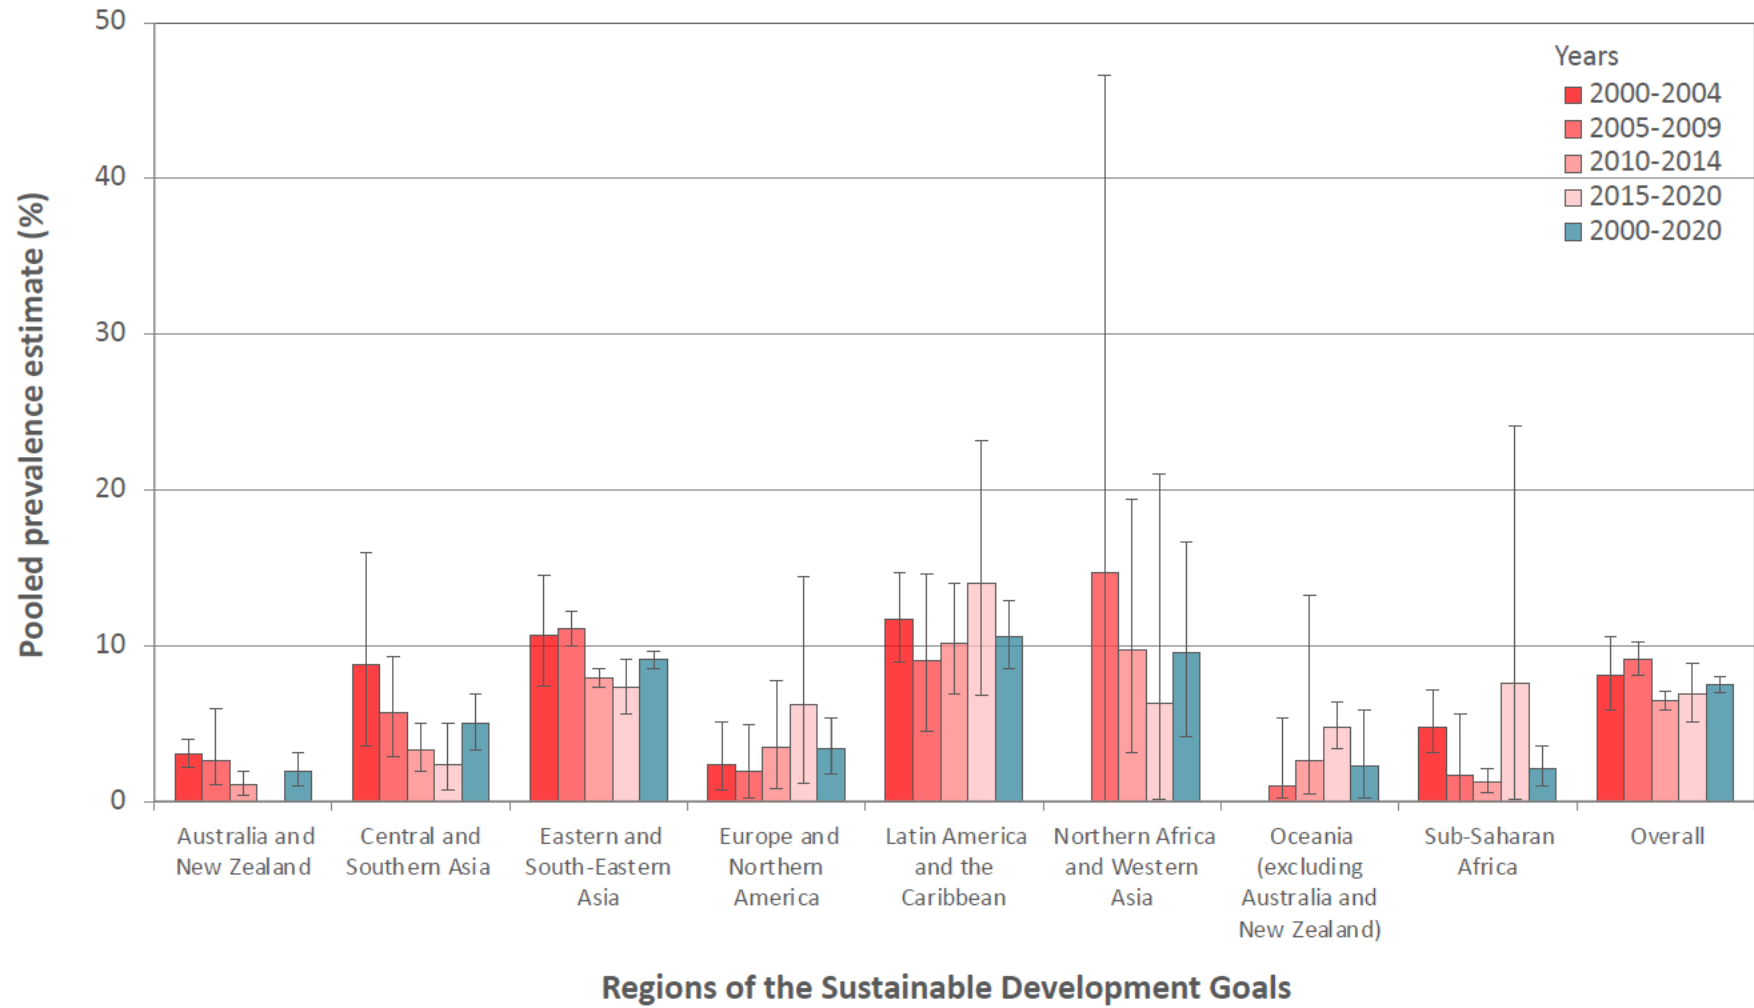

**Figure S5.1.** Australia and New Zealand SDG Region: Pooled syphilis prevalence estimates among MSM between 2000-2020

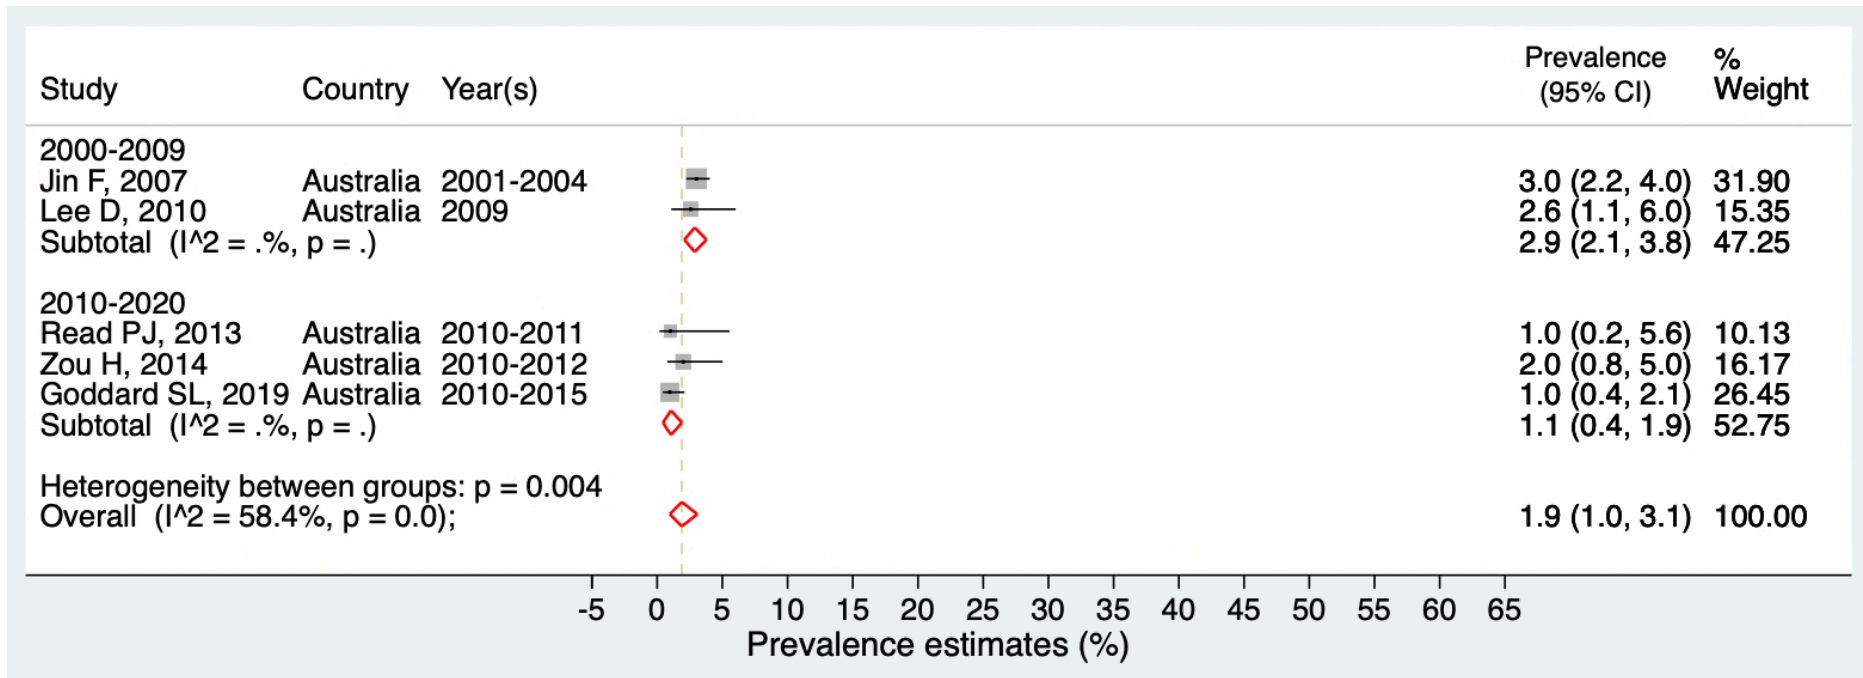

Diamonds indicate pooled mean prevalence estimates; the extremes of the diamonds indicate 95% CIs

Figure S5.2. Central and Southern Asia SDG Region: Pooled syphilis prevalence estimates among MSM between 2000-2020

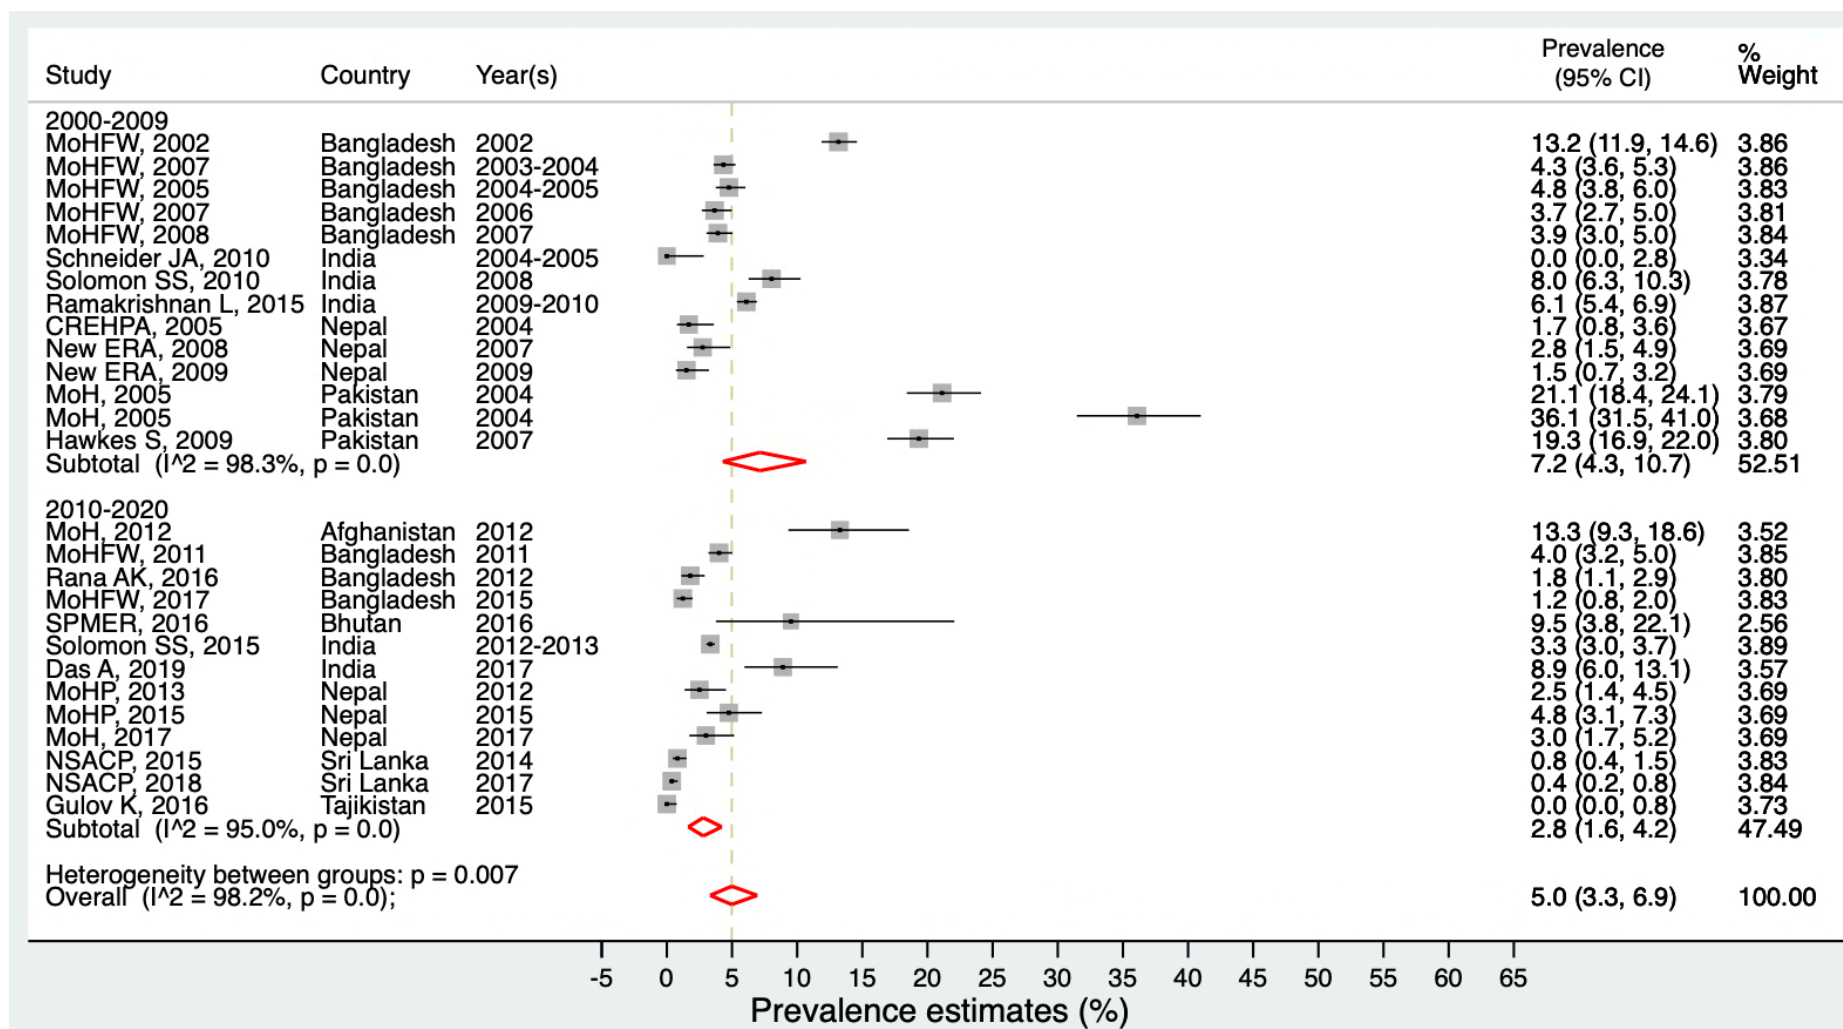

Diamonds indicate pooled mean prevalence estimates; the extremes of the diamonds indicate 95% CIs

Figure S5.3a. Eastern and South-Eastern Asia SDG Region: Pooled syphilis prevalence estimates among MSM between 2000-2009

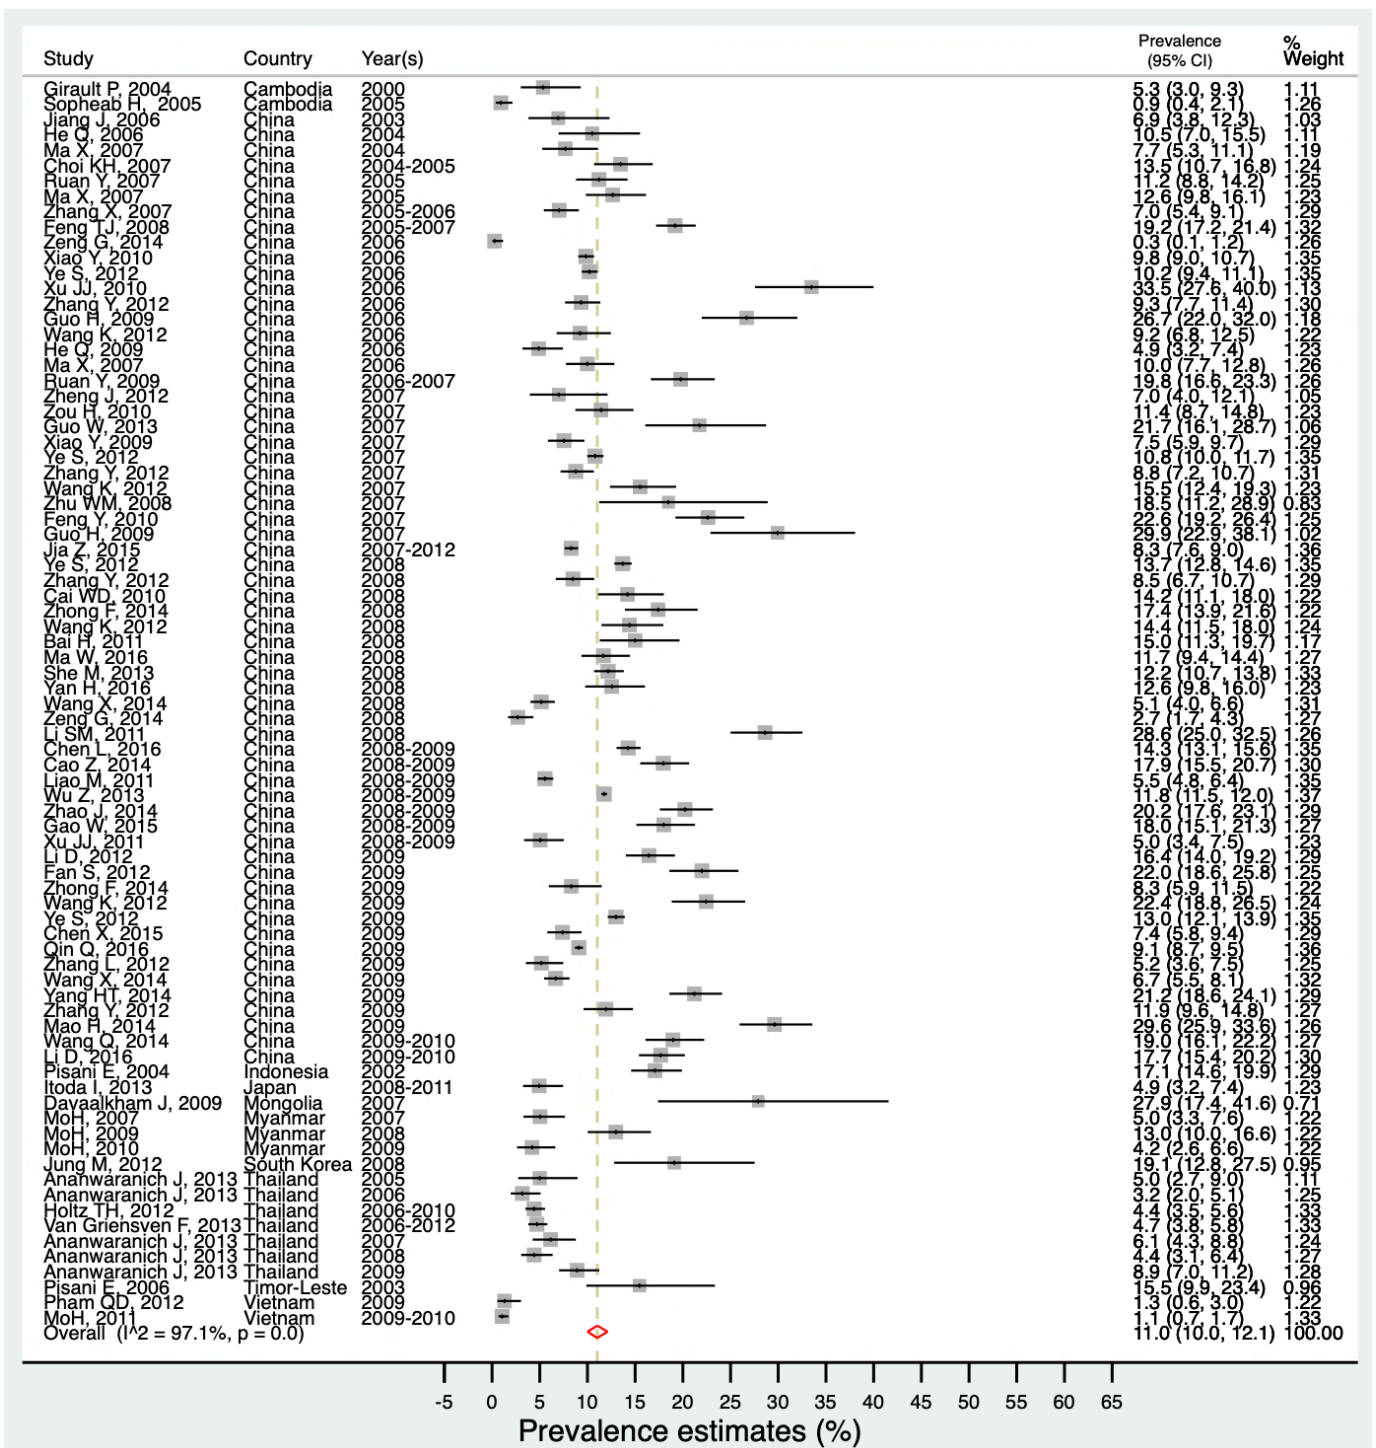

Diamonds indicate pooled mean prevalence estimates; the extremes of the diamonds indicate 95% CIs

**Figure S5.3b.** Eastern and South-Eastern Asia SDG Region: Pooled syphilis prevalence estimates among MSM between 2010-2020

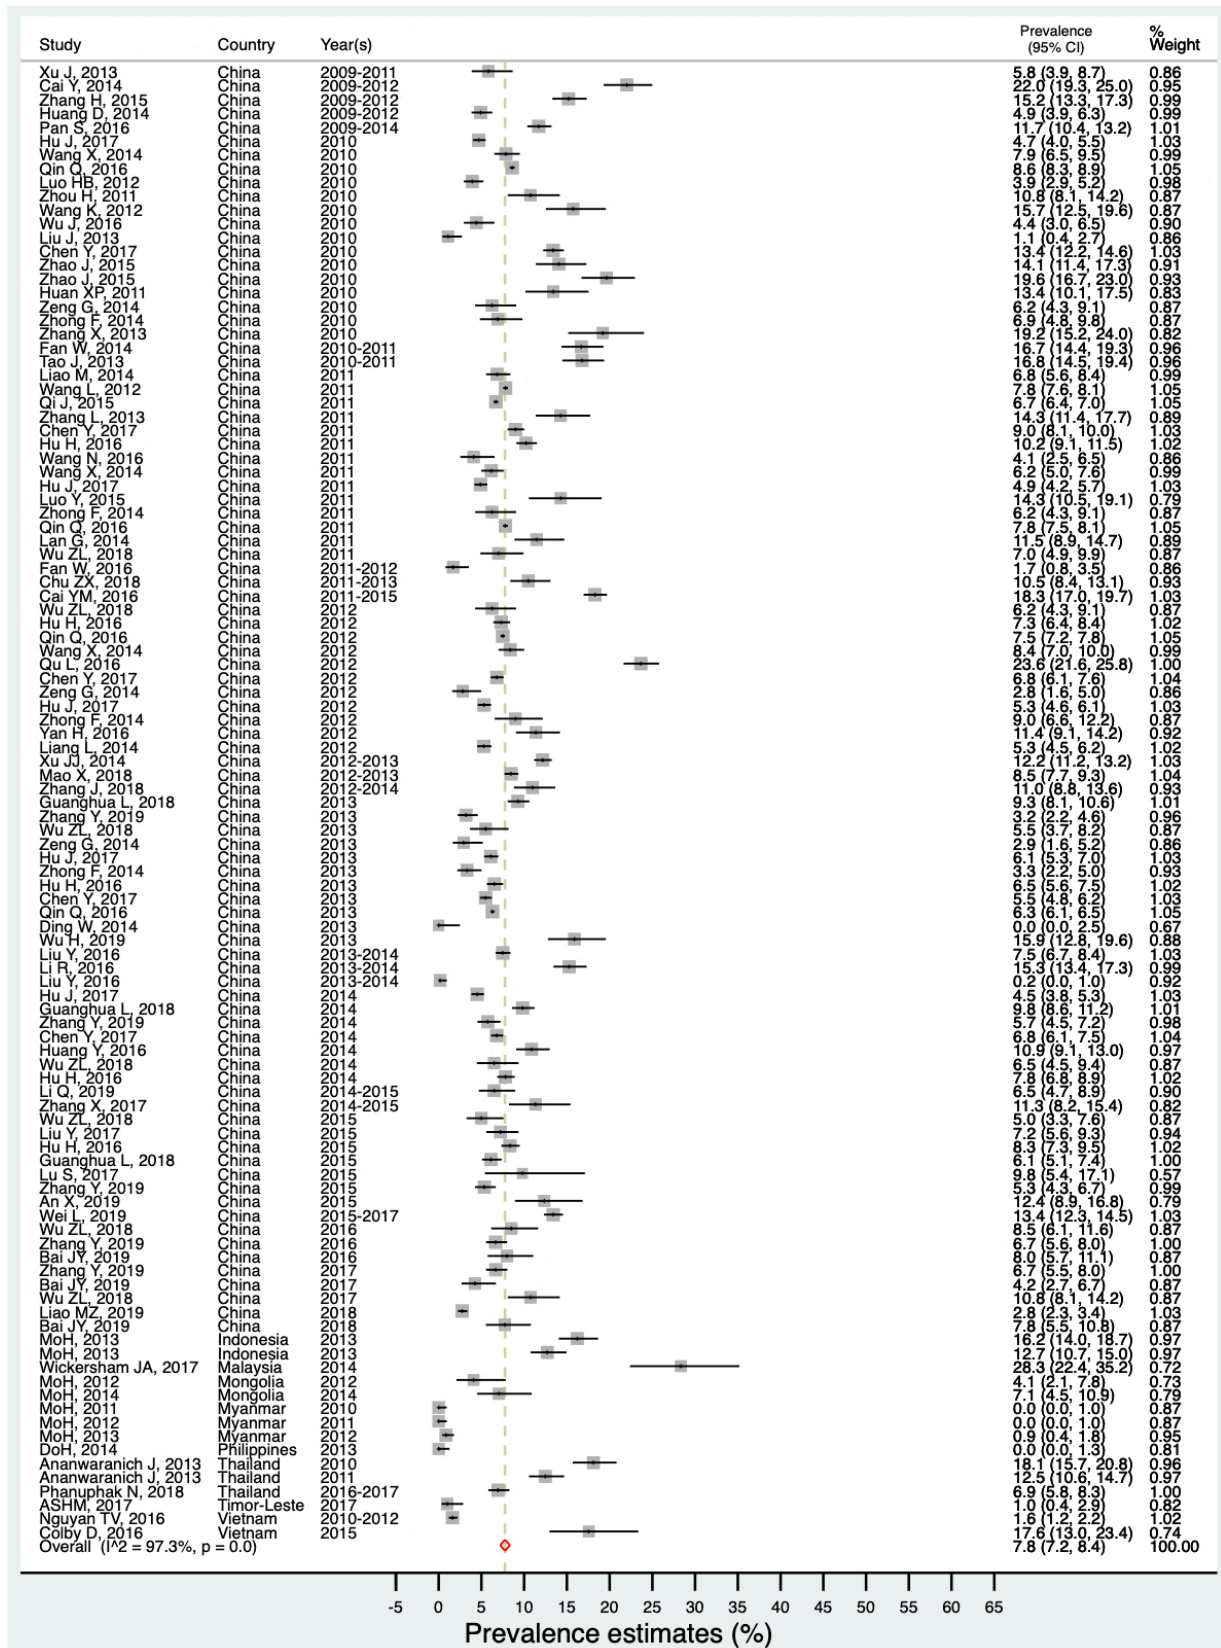

Diamonds indicate pooled mean prevalence estimates; the extremes of the diamonds indicate 95% CIs



**Figure S5.4.** Europe and Northern America SDG Region: Pooled syphilis prevalence estimates among MSM between 2000–2020

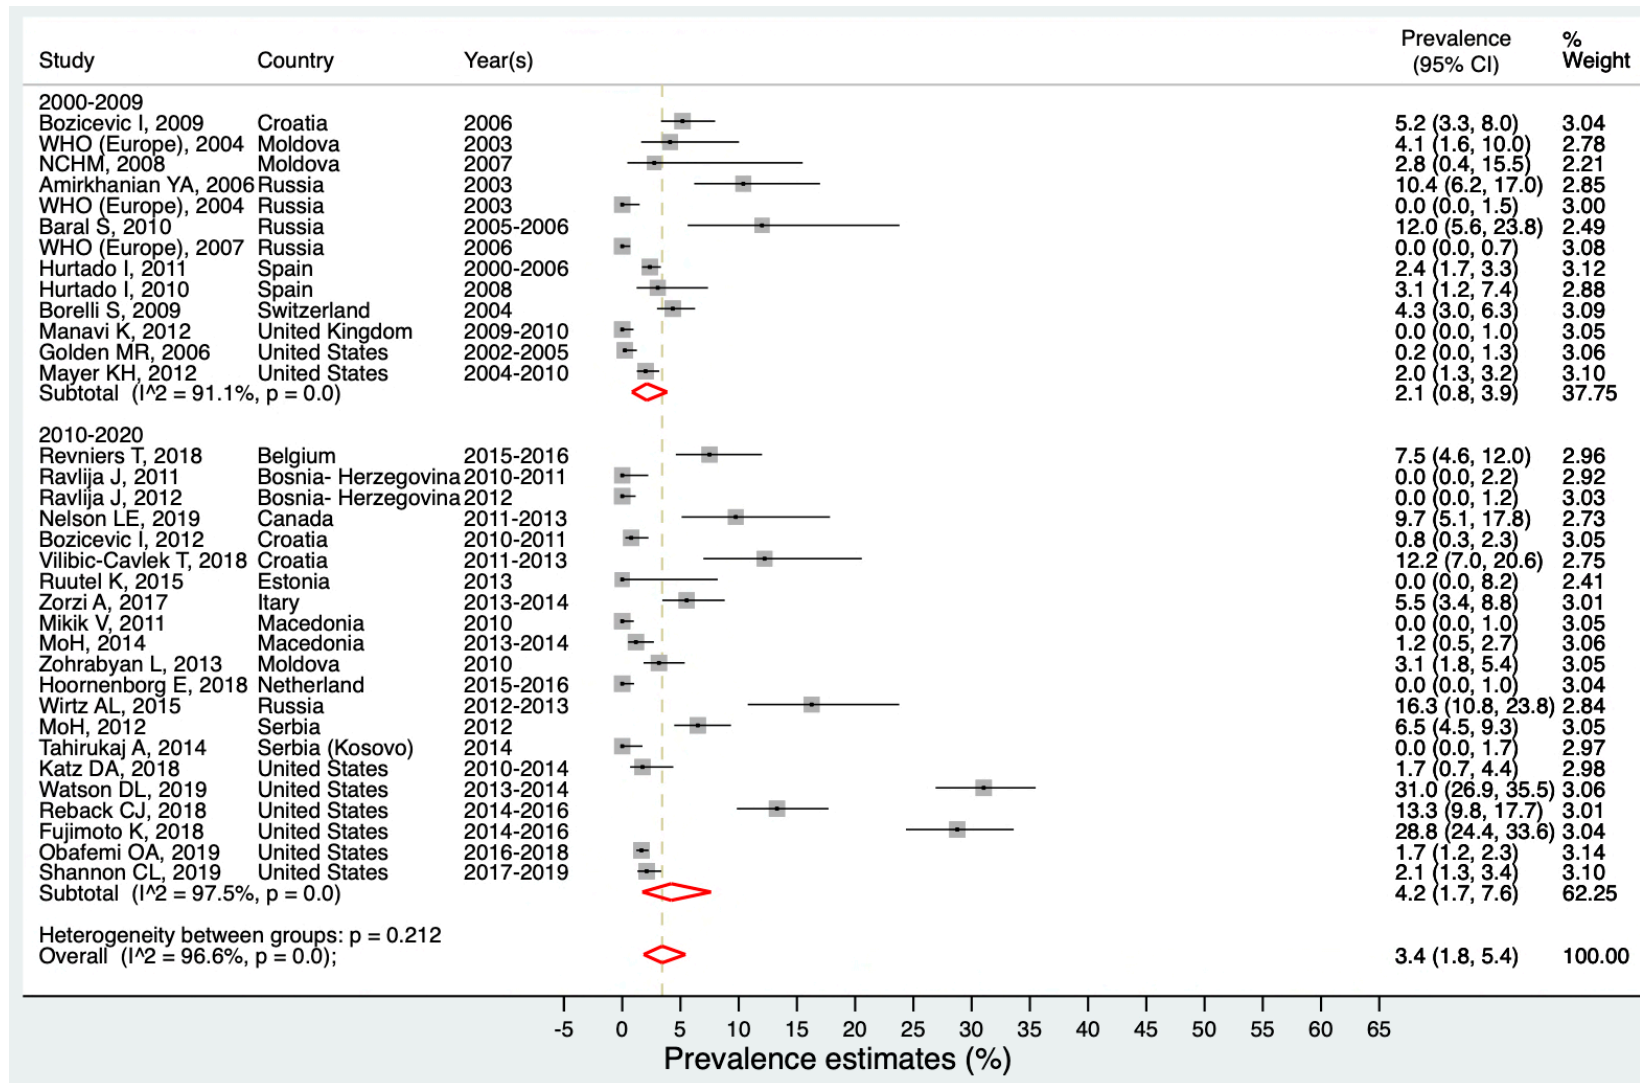

Diamonds indicate pooled mean prevalence estimates; the extremes of the diamonds indicate 95% CIs

**Figure S5.5.** Latin America and the Caribbean SDG Region: Pooled syphilis prevalence estimates among MSM between 2000-2020

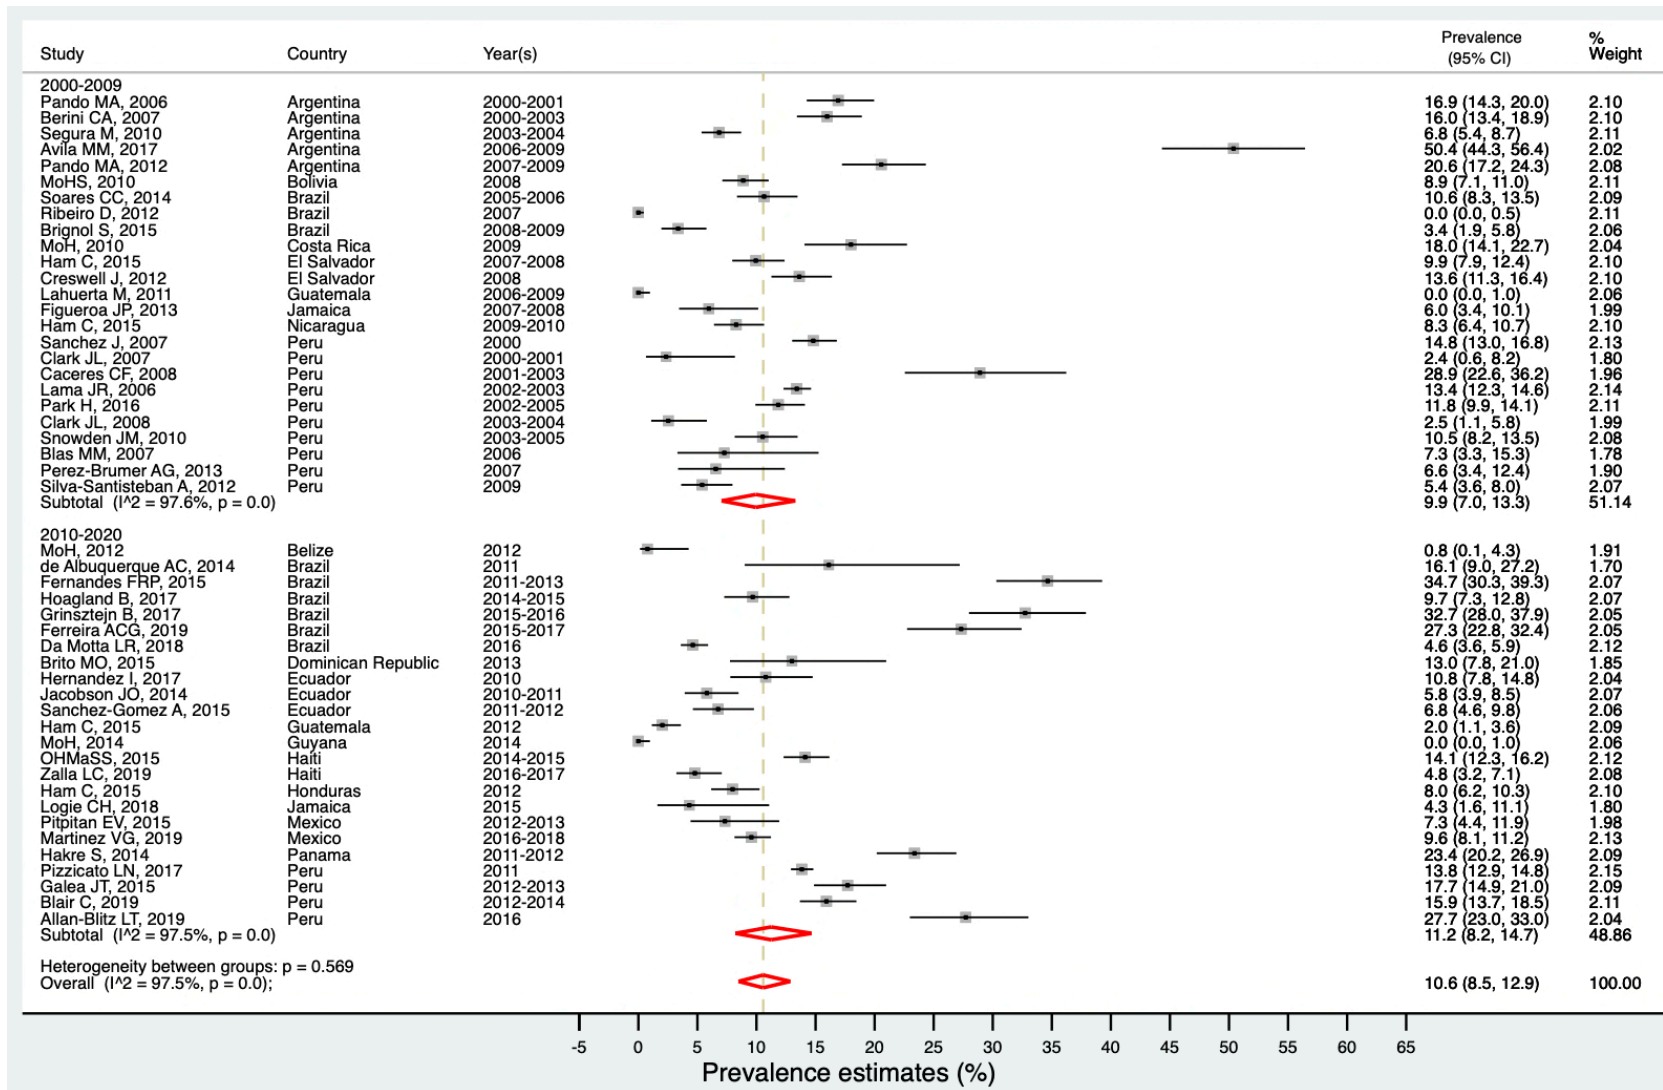

Diamonds indicate pooled mean prevalence estimates; the extremes of the diamonds indicate 95% CIs

**Figure S5.6.** Northern Africa and Western Asia SDG Region: Pooled syphilis prevalence estimates among MSM between 2000-2020

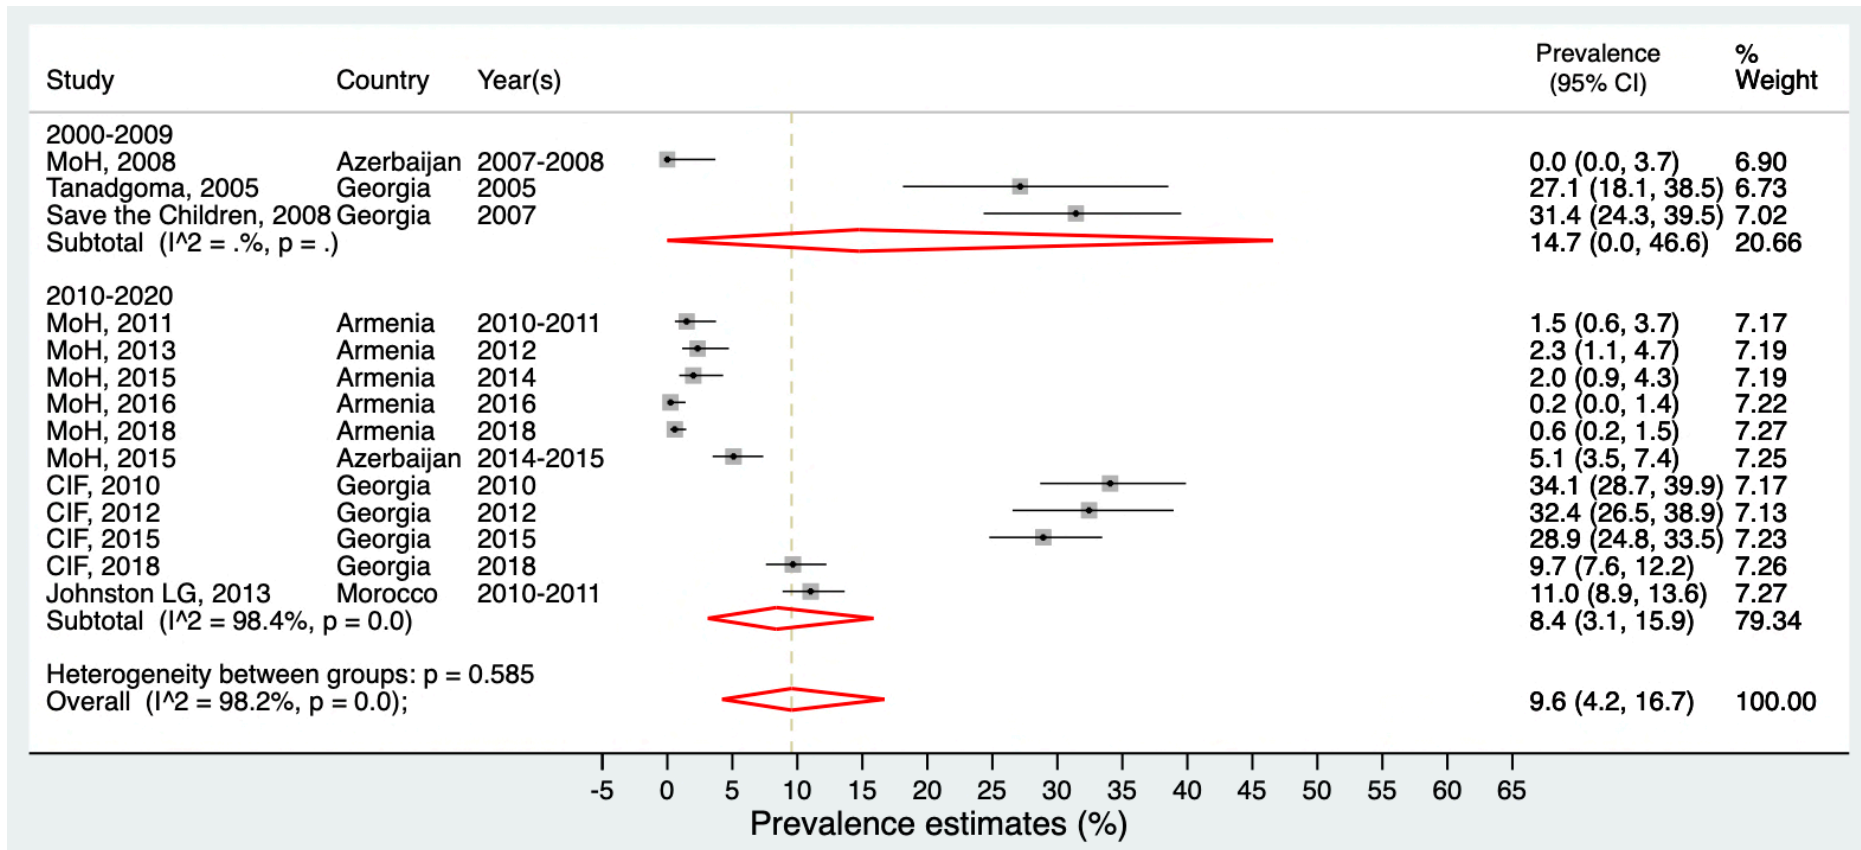

Diamonds indicate pooled mean prevalence estimates; the extremes of the diamonds indicate 95% CIs



**Figure S5.7.** Oceania (excluding Australia/New Zealand) SDG Region: Pooled syphilis prevalence estimates among MSM between 2000-2020

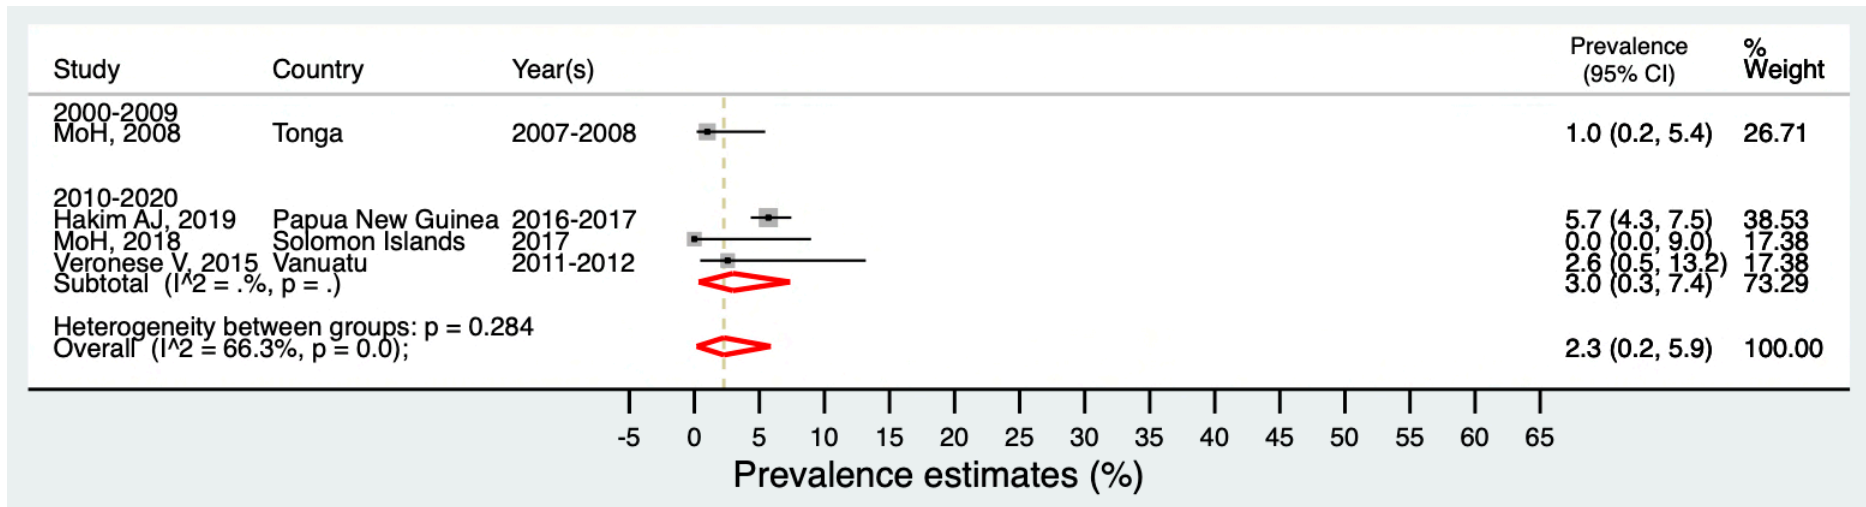

Diamonds indicate pooled mean prevalence estimates; the extremes of the diamonds indicate 95% CIs

Figure S5.8. Sub-Saharan Africa SDG Region: Pooled syphilis prevalence estimates among MSM between 2000-2020

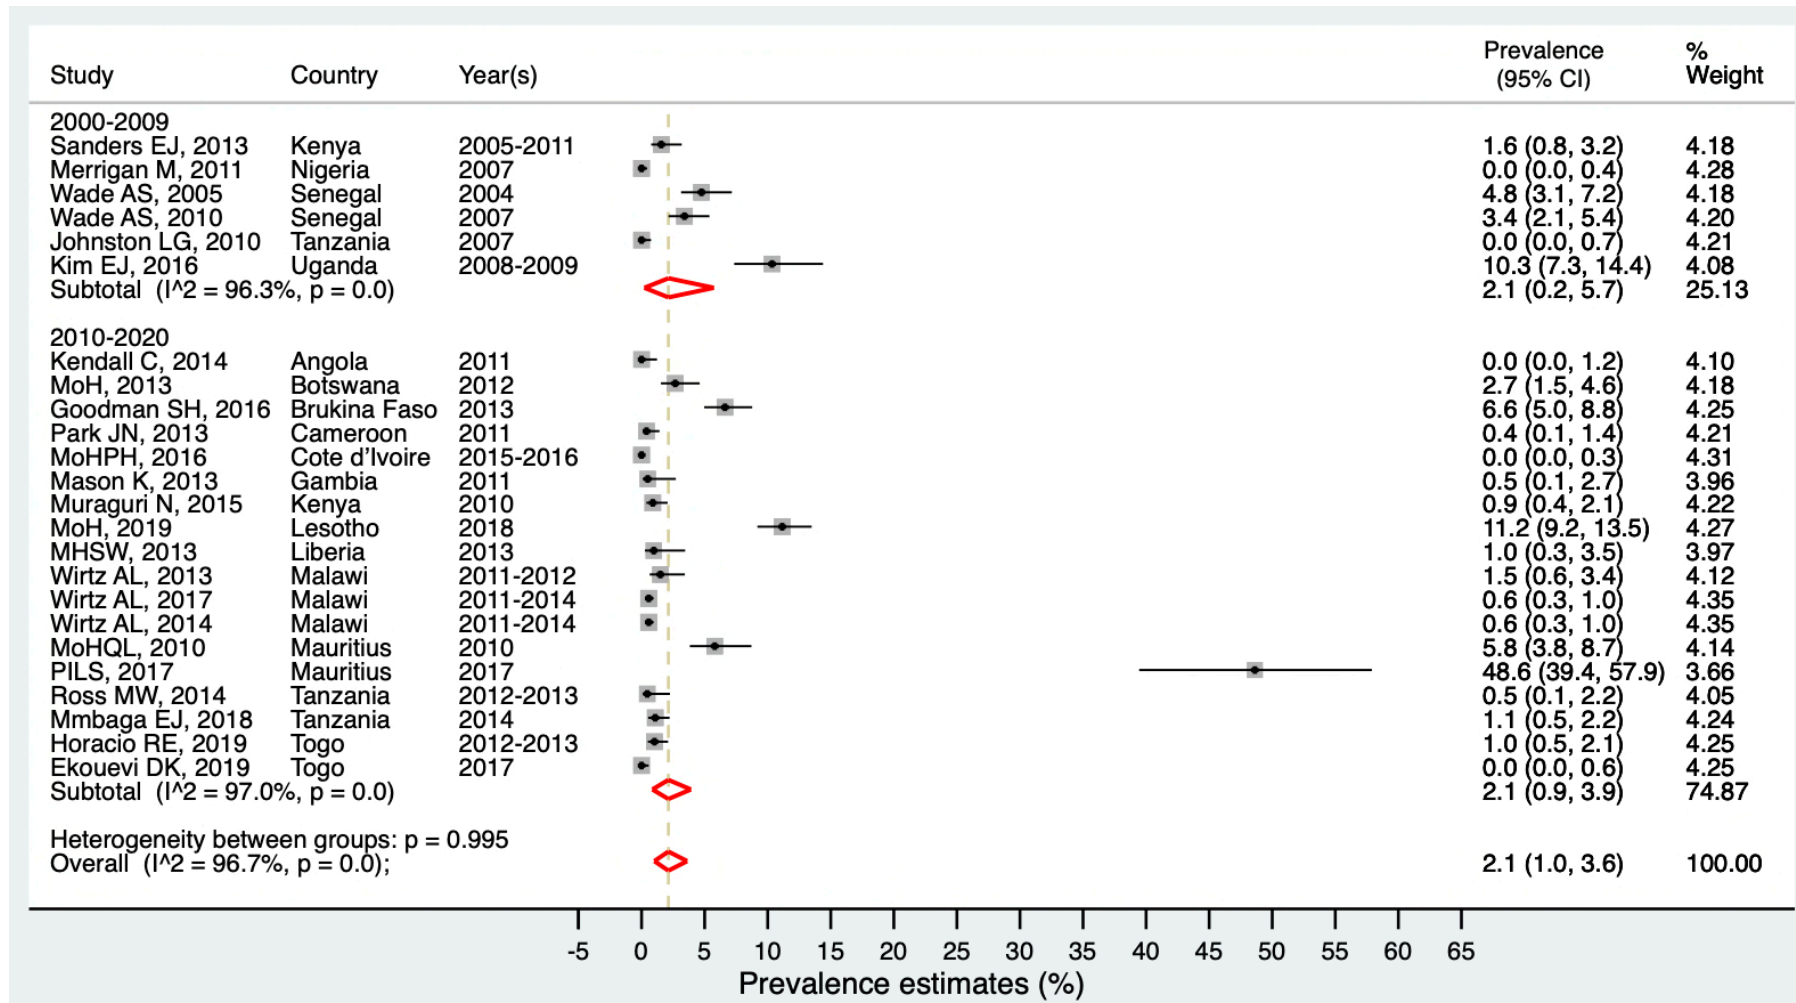

Diamonds indicate pooled mean prevalence estimates; the extremes of the diamonds indicate 95% CIs

**Table S1.** PRISMA Checklist

| Section/topic                      | #  | Checklist item                                                                                                                                                                                                                                                                                              | Reported on page #             |
|------------------------------------|----|-------------------------------------------------------------------------------------------------------------------------------------------------------------------------------------------------------------------------------------------------------------------------------------------------------------|--------------------------------|
| <b>TITLE</b>                       |    |                                                                                                                                                                                                                                                                                                             |                                |
| Title                              | 1  | Identify the report as a systematic review, meta-analysis, or both.                                                                                                                                                                                                                                         | 1                              |
| <b>ABSTRACT</b>                    |    |                                                                                                                                                                                                                                                                                                             |                                |
| Structured summary                 | 2  | Provide a structured summary including, as applicable: background; objectives; data sources; study eligibility criteria, participants, and interventions; study appraisal and synthesis methods; results; limitations; conclusions and implications of key findings; systematic review registration number. | 2                              |
| <b>INTRODUCTION</b>                |    |                                                                                                                                                                                                                                                                                                             |                                |
| Rationale                          | 3  | Describe the rationale for the review in the context of what is already known.                                                                                                                                                                                                                              | 5                              |
| Objectives                         | 4  | Provide an explicit statement of questions being addressed with reference to participants, interventions, comparisons, outcomes, and study design (PICOS).                                                                                                                                                  | 5                              |
| <b>METHODS</b>                     |    |                                                                                                                                                                                                                                                                                                             |                                |
| Protocol and registration          | 5  | Indicate if a review protocol exists, if and where it can be accessed (e.g., Web address), and, if available, provide registration information including registration number.                                                                                                                               | 6                              |
| Eligibility criteria               | 6  | Specify study characteristics (e.g., PICOS, length of follow-up) and report characteristics (e.g., years considered, language, publication status) used as criteria for eligibility, giving rationale.                                                                                                      | 6                              |
| Information sources                | 7  | Describe all information sources (e.g., databases with dates of coverage, contact with study authors to identify additional studies) in the search and date last searched.                                                                                                                                  | 6                              |
| Search                             | 8  | Present full electronic search strategy for at least one database, including any limits used, such that it could be repeated.                                                                                                                                                                               | 6                              |
| Study selection                    | 9  | State the process for selecting studies (i.e., screening, eligibility, included in systematic review, and, if applicable, included in the meta-analysis).                                                                                                                                                   | 6-7                            |
| Data collection process            | 10 | Describe method of data extraction from reports (e.g., piloted forms, independently, in duplicate) and any processes for obtaining and confirming data from investigators.                                                                                                                                  | 7                              |
| Data items                         | 11 | List and define all variables for which data were sought (e.g., PICOS, funding sources) and any assumptions and simplifications made.                                                                                                                                                                       | 7-8                            |
| Risk of bias in individual studies | 12 | Describe methods used for assessing risk of bias of individual studies (including specification of whether this was done at the study or outcome level), and how this information is to be used in any data synthesis.                                                                                      | 8, Supplementary materials p38 |
| Summary measures                   | 13 | State the principal summary measures (e.g., risk ratio, difference in means).                                                                                                                                                                                                                               | 7                              |
| Synthesis of results               | 14 | Describe the methods of handling data and combining results of studies, if done, including measures of consistency (e.g., $I^2$ ) for each meta-analysis.                                                                                                                                                   | 7                              |

| Section/topic                 | #  | Checklist item                                                                                                                                                                                           | Reported on page #                      |
|-------------------------------|----|----------------------------------------------------------------------------------------------------------------------------------------------------------------------------------------------------------|-----------------------------------------|
| Risk of bias across studies   | 15 | Specify any assessment of risk of bias that may affect the cumulative evidence (e.g., publication bias, selective reporting within studies).                                                             | 8                                       |
| Additional analyses           | 16 | Describe methods of additional analyses (e.g., sensitivity or subgroup analyses, meta-regression), if done, indicating which were pre-specified.                                                         | 7-8                                     |
| <b>RESULTS</b>                |    |                                                                                                                                                                                                          |                                         |
| Study selection               | 17 | Give numbers of studies screened, assessed for eligibility, and included in the review, with reasons for exclusions at each stage, ideally with a flow diagram.                                          | 8, figure 1                             |
| Study characteristics         | 18 | For each study, present characteristics for which data were extracted (e.g., study size, PICOS, follow-up period) and provide the citations.                                                             | Supplementary materials p28-34          |
| Risk of bias within studies   | 19 | Present data on risk of bias of each study and, if available, any outcome level assessment (see item 12).                                                                                                | Supplementary materials p28-34          |
| Results of individual studies | 20 | For all outcomes considered (benefits or harms), present, for each study: (a) simple summary data for each intervention group (b) effect estimates and confidence intervals, ideally with a forest plot. | 8, table 1 and 2, and Figure S5.1.-5.8. |
| Synthesis of results          | 21 | Present results of each meta-analysis done, including confidence intervals and measures of consistency.                                                                                                  | 8-9                                     |
| Risk of bias across studies   | 22 | Present results of any assessment of risk of bias across studies (see Item 15).                                                                                                                          | 10-11                                   |
| Additional analysis           | 23 | Give results of additional analyses, if done (e.g., sensitivity or subgroup analyses, meta-regression [see Item 16]).                                                                                    | 9-11, table 1-3                         |
| <b>DISCUSSION</b>             |    |                                                                                                                                                                                                          |                                         |
| Summary of evidence           | 24 | Summarize the main findings including the strength of evidence for each main outcome; consider their relevance to key groups (e.g., healthcare providers, users, and policy makers).                     | 11-13                                   |
| Limitations                   | 25 | Discuss limitations at study and outcome level (e.g., risk of bias), and at review-level (e.g., incomplete retrieval of identified research, reporting bias).                                            | 13                                      |
| Conclusions                   | 26 | Provide a general interpretation of the results in the context of other evidence, and implications for future research.                                                                                  | 13-14                                   |
| <b>FUNDING</b>                |    |                                                                                                                                                                                                          |                                         |
| Funding                       | 27 | Describe sources of funding for the systematic review and other support (e.g., supply of data); role of funders for the systematic review.                                                               | 8                                       |

From: Moher D, Liberati A, Tetzlaff J, Altman DG, The PRISMA Group (2009). Preferred Reporting Items for Systematic Reviews and Meta-Analyses: The PRISMA Statement. PLOS Med 6(7): e1000097. doi:10.1371/journal.pmed1000097

**Table S2.** Sensitivity and specificity of syphilis diagnostic tests

| Diagnostic tests                                            | Sensitivity (%) | Specificity (%) | No. of data points | No. of MSM tested |
|-------------------------------------------------------------|-----------------|-----------------|--------------------|-------------------|
| <b>Non-treponemal test combined with treponemal test</b>    |                 |                 |                    |                   |
| RPR plus any Treponemal test (regardless of RPR titer)*     | ~100            | ~100            | 211                | 501,078           |
| VDRL plus any Treponemal test (regardless of VDRL titer)*   | ~100            | ~100            | 19                 | 10,767            |
| TRUST plus any Treponemal test (regardless of TRUST titer)* | ~100            | ~100            | 33                 | 56,486            |
| Wasserman reaction assay plus TPHA                          | ~100            | ~100            | 1                  | 125               |
| Chembio DPP Syphilis Screen & Confirm Assay                 | ~100            | ~100            | 1                  | 860               |
| <b>Non-treponemal test only</b>                             |                 |                 |                    |                   |
| RPR only <sup>1-3</sup>                                     | 84.6~100        | 98.3-99.6       | 3                  | 515               |
| RPR≥1:8                                                     | ~100            | ~100            | 3                  | 712               |
| VDRL only <sup>1-3</sup>                                    | 83.8~100        | 96.1-98.9       | 6                  | 2,760             |
| <b>Treponemal test only</b>                                 |                 |                 |                    |                   |
| TPPA <sup>4-6</sup>                                         | 92.1~100        | 95~100          | 6                  | 2,868             |
| TPHA <sup>5</sup>                                           | 86~100          | 96              | 8                  | 6,496             |
| EIA/ELISA (overall) <sup>4,6</sup>                          | 85.3~98.5       | 82.6~98.6       | 13                 | 5,188             |
| Immunochemiluminescence                                     |                 |                 |                    |                   |
| CLIA (LIAISON Treponema screen) <sup>5,6</sup>              | 95.8~96.9       | 94.5~99.1       | 1                  | 374               |
| POCT (Rapid test) (overall)                                 | 85.7~98.8       | 89.7~98.5       | 7                  | 4,458             |
| Determine Syphilis TP <sup>7</sup>                          | 91.8            | 98.5            | 6                  | 2,054             |
| SD Bioine Syphilis 3.0 <sup>8,9</sup>                       | 86.0-98.8       | 91.4-96.8       | 5                  | 1,451             |
| Syphilis Health Check <sup>8,10</sup>                       | 85.7-95.3       | 89.7-98.1       | 1                  | 788               |
| SD Bioline HIV/Syphilis Duo <sup>11</sup>                   | 95.5            | 99.9            | 1                  | 678               |
| Multiplex flow immunoassay <sup>6</sup>                     | 96.9            | 96.7            | 1                  | 442               |
| Any combination of two treponemal tests                     | ~100            | ~100            | 10                 | 5,827             |
| <b>Other tests</b>                                          |                 |                 |                    |                   |
| Syphilis antibody/ Treponema antibody/ RPGA <sup>†</sup>    | 83.8~100        | 82.6~100        | 8                  | 1,923             |
| PCR test for blood specimen <sup>12</sup>                   | 31.2~52.2       | 83.3~95.7       | 1                  | 382               |

Notes:

1. For studies that reported more than one data point for the same study population, we used prevalence data based on qualitative diagnostic methods that were based on both non-treponemal and treponemal tests to produce corrected point prevalence estimates. One exception was a study that had data based on qualitative and quantitative non-treponemal tests; we used quantitative non-treponemal test results because they are considered to be more accurate.
2. If there was a range for either the sensitivity or specificity of a specific biological assay, we used the midpoint to calculate the corrected point estimate.

\*Including TPPA, TPHA, FTA-ABS, MHA-TP, EIA, ELISA, POCT (rapid test).

†Considered as the whole range of any non-treponemal and treponemal test because the definition of syphilis antibody or treponemal antibody was not clearly described and no sensitivity and specificity data of RPGA was obtained.

CLIA: chemiluminescence immunoassay, EIA: enzyme immunoassay, ELISA: enzyme linked immunosorbent assay, FTA-ABS: fluorescent treponemal antibody absorption, MHA-TP: microhemagglutination assay for *Treponema pallidum*, POCT: point of care test, RPGA: reaction of passive hemagglutination, RPR: rapid plasma reagin, TPHA: *treponema pallidum* hemagglutination test, TPPA: *treponema pallidum* particle agglutination test, TRUST: toluidine red unheated serum test, VDRL: venereal disease research laboratory.

**Table S3.** Pooled syphilis prevalence estimates among MSM in regions of the World Health Organization between 2000-2020

| WHO Regions           | No. of MSM tested positive | No. of MSM tested (% of total) | Uncorrected pooled prevalence estimates (95%CI) | Corrected pooled prevalence estimates (95%CI) | Median no. of positive diagnoses | Range of study sample size | No. of countries | No. of point prevalence data (% of total) | Heterogeneity I <sup>2</sup> (%)* |
|-----------------------|----------------------------|--------------------------------|-------------------------------------------------|-----------------------------------------------|----------------------------------|----------------------------|------------------|-------------------------------------------|-----------------------------------|
| <b>2000-2020</b>      |                            |                                |                                                 |                                               |                                  |                            |                  |                                           |                                   |
| Americas              | 4,567                      | 38,104 (6.3)                   | 11.0 (8.9-13.2)                                 | 10.0 (7.9-12.3)                               | 54                               | 62-5,101                   | 19               | 58 (16.8)                                 | 98.0                              |
| Africa                | 573                        | 16,054 (2.6)                   | 2.9 (1.6-4.6)                                   | 2.1 (1.0-3.6)                                 | 7                                | 109-2,442                  | 16               | 24 (7.0)                                  | 96.7                              |
| Eastern Mediterranean | 592                        | 2,958 (0.5)                    | 20.4 (13.7-28.1)                                | 19.6 (12.8-27.4)                              | 140                              | 207-915                    | 3                | 5 (1.4)                                   | 95.9                              |
| Europe                | 874                        | 12,635 (2.1)                   | 6.6 (4.3-9.4)                                   | 4.1 (2.2-6.5)                                 | 11                               | 31-1,387                   | 17               | 39 (11.3)                                 | 97.0                              |
| South-East Asia       | 2,763                      | 49,700 (8.2)                   | 5.4 (4.3-6.7)                                   | 4.7 (3.6-6.0)                                 | 27                               | 42-11,997                  | 9                | 43 (12.5)                                 | 97.3                              |
| Western Pacific       | 42,698                     | 486,781 (80.3)                 | 9.5 (9.0-10.1)                                  | 9.0 (8.5-9.6)                                 | 65.5                             | 39-47,231                  | 13               | 176 (51.0)                                | 97.6                              |
| Total                 | 52,067                     | 606,232 (100)                  | 8.4 (7.9-8.9)                                   | 7.5 (7.0-8.0)                                 | 48                               | 31-47,231                  | 77               | 345 (100)                                 | 98.1                              |
| <b>2010-2020</b>      |                            |                                |                                                 |                                               |                                  |                            |                  |                                           |                                   |
| Americas              | 2,654                      | 21,200 (5.0)                   | 12.2 (9.1-15.7)                                 | 11.0 (7.9-14.4)                               | 49                               | 62-5,101                   | 14               | 31 (15.5)                                 | 98.2                              |
| Africa                | 496                        | 12,985 (3.1)                   | 3.1 (1.6-5.1)                                   | 2.1 (0.9-3.9)                                 | 7                                | 109-2,442                  | 13               | 18 (9.0)                                  | 97.0                              |
| Eastern Mediterranean | 109                        | 869 (0.2)                      | 12.4 (10.2-14.7)                                | 11.5 (9.5-13.7)                               | 54.5                             | 207-662                    | 2                | 2 (1.0)                                   | -                                 |
| Europe                | 628                        | 8,321 (2.0)                    | 5.9 (3.0-9.5)                                   | 3.9 (1.6-7.2)                                 | 9                                | 43-700                     | 14               | 25 (12.5)                                 | 97.6                              |
| South-East Asia       | 1,323                      | 27,569 (6.6)                   | 4.9 (3.1-7.1)                                   | 3.9 (2.3-6.1)                                 | 20                               | 42-11,997                  | 9                | 20 (10.0)                                 | 98.1                              |
| Western Pacific       | 27,156                     | 349,411 (83.1)                 | 8.0 (7.5-8.6)                                   | 7.7 (7.1-8.2)                                 | 66.5                             | 39-42,680                  | 9                | 104 (52.0)                                | 97.0                              |
| Sub-total             | 32,366                     | 420,355 (100)                  | 7.5 (6.9-8.0)                                   | 6.6 (6.0-7.2)                                 | 43                               | 39-42,680                  | 61               | 200 (100)                                 | 98.0                              |
| <b>2000-2009</b>      |                            |                                |                                                 |                                               |                                  |                            |                  |                                           |                                   |
| Americas              | 1,913                      | 16,904 (9.1)                   | 9.6 (7.0-12.6)                                  | 9.0 (6.1-12.2)                                | 54                               | 78-3,280                   | 10               | 27 (18.6)                                 | 97.9                              |
| Africa                | 77                         | 3,069 (1.7)                    | 2.4 (0.4-5.8)                                   | 2.1 (0.2-5.7)                                 | 12                               | 290-879                    | 5                | 6 (4.1)                                   | 96.3                              |
| Eastern Mediterranean | 483                        | 2,089 (1.1)                    | 25.0 (16.9-34.2)                                | 25.0 (16.9-34.2)                              | 166                              | 388-915                    | 1                | 3 (2.1)                                   | -                                 |
| Europe                | 246                        | 4,314 (2.3)                    | 8.1 (4.7-12.3)                                  | 4.4 (1.7-8.2)                                 | 12.5                             | 31-1,387                   | 8                | 14 (9.7)                                  | 95.4                              |
| South-East Asia       | 1,440                      | 22,131 (11.9)                  | 5.9 (4.6-7.5)                                   | 5.5 (4.1-7.0)                                 | 38                               | 110-3,739                  | 7                | 23 (15.9)                                 | 95.0                              |
| Western Pacific       | 15,542                     | 137,370 (73.9)                 | 12.0 (10.9-13.1)                                | 11.3 (10.2-12.5)                              | 64.5                             | 50-47,231                  | 8                | 72 (49.7)                                 | 97.2                              |
| Sub-total             | 19,701                     | 185,877 (100)                  | 9.8 (8.9-10.8)                                  | 8.9 (8.0-9.9)                                 | 54                               | 31-47,231                  | 39               | 145 (100)                                 | 97.8                              |

\*Heterogeneity between subgroups in all subgroup analyses had a P value <0.001

**Table S4.** Pooled syphilis prevalence estimates among MSM in regions of the World Health Organization between 2000-2020 in five-year intervals

| WHO Regions           | No. of MSM tested positive | No. of MSM tested (% of total) | Uncorrected pooled prevalence estimates (95%CI) | Corrected pooled prevalence estimates (95%CI) | Median no. of positive diagnoses | Range of study sample size | No. of countries | No. of point prevalence data (% of total) | Heterogeneity $I^2$ (%)* |
|-----------------------|----------------------------|--------------------------------|-------------------------------------------------|-----------------------------------------------|----------------------------------|----------------------------|------------------|-------------------------------------------|--------------------------|
| <b>2015-2020</b>      |                            |                                |                                                 |                                               |                                  |                            |                  |                                           |                          |
| Americas              | 841                        | 7,950 (19.7)                   | 14.5 (8.2-22.2)                                 | 12.0 (6.2-19.3)                               | 62                               | 83-2,296                   | 6                | 11 (22.4)                                 | 98.7                     |
| Africa                | 151                        | 2,900 (7.2)                    | 8.4 (0.5-23.8)                                  | 7.6 (0.1-24.1)                                | 29.5                             | 109-1,288                  | 4                | 4 (8.2)                                   | 99.3                     |
| Eastern Mediterranean | -                          | -                              | -                                               | -                                             | -                                | -                          | -                | -                                         | -                        |
| Europe                | 235                        | 3,212 (8.0)                    | 5.3 (0.7-13.4)                                  | 3.6 (0.1-11.2)                                | 11                               | 200-700                    | 5                | 7 (14.3)                                  | 98.6                     |
| South-East Asia       | 213                        | 5,905 (14.6)                   | 4.2 (1.7-7.6)                                   | 3.4 (1.2-6.5)                                 | 17.5                             | 42-1,626                   | 7                | 8 (16.3)                                  | 96.1                     |
| Western Pacific       | 1,534                      | 20,390 (50.5)                  | 7.3 (5.7-9.2)                                   | 7.3 (5.7-9.2)                                 | 43                               | 39-3,613                   | 4                | 19 (38.8)                                 | 95.3                     |
| Sub-total             | 2,974                      | 40,357 (100)                   | 7.9 (6.0-9.9)                                   | 6.9 (5.1-8.9)                                 | 38                               | 39-3,613                   | 26               | 49 (100)                                  | 98.2                     |
| <b>2010-2014</b>      |                            |                                |                                                 |                                               |                                  |                            |                  |                                           |                          |
| Americas              | 1,813                      | 13,250 (3.5)                   | 11.0 (7.8-14.7)                                 | 10.4 (7.1-14.2)                               | 29                               | 62-5,101                   | 13               | 20 (13.2)                                 | 97.3                     |
| Africa                | 345                        | 10,085 (2.7)                   | 2.2 (1.3-3.4)                                   | 1.3 (0.6-2.1)                                 | 7                                | 205-2,442                  | 11               | 14 (9.3)                                  | 89.9                     |
| Eastern Mediterranean | 109                        | 869 (0.2)                      | 12.4 (10.3-14.7)                                | 11.5 (9.5-13.7)                               | 54.5                             | 207-662                    | 2                | 2 (1.3)                                   | -                        |
| Europe                | 393                        | 5,109 (1.3)                    | 6.1 (2.9-10.5)                                  | 4.1 (1.5-7.9)                                 | 8                                | 43-500                     | 11               | 18 (11.9)                                 | 96.9                     |
| South-East Asia       | 1,110                      | 21,664 (5.7)                   | 5.4 (2.9-8.5)                                   | 4.3 (2.0-7.4)                                 | 48.5                             | 400-11,997                 | 7                | 12 (7.9)                                  | 98.6                     |
| Western Pacific       | 25,622                     | 329,021 (86.6)                 | 8.2 (7.6-8.8)                                   | 7.7 (7.2-8.4)                                 | 71                               | 39-42,680                  | 7                | 85 (56.3)                                 | 97.2                     |
| Sub-total             | 29,392                     | 379,998 (100)                  | 7.4 (6.8-8.0)                                   | 6.5 (5.9-7.1)                                 | 44                               | 39-42,680                  | 51               | 151 (100)                                 | 98.0                     |
| <b>2005-2009</b>      |                            |                                |                                                 |                                               |                                  |                            |                  |                                           |                          |
| Americas              | 757                        | 7,727 (4.8)                    | 9.4 (5.5-14.1)                                  | 8.4 (4.3-13.6)                                | 43                               | 78-850                     | 10               | 16 (14.2)                                 | 98.2                     |
| Africa                | 56                         | 2,627 (1.6)                    | 2.0 (0.1-5.7)                                   | 1.7 (0.5-6)                                   | 7                                | 290-879                    | 5                | 5 (4.4)                                   | 96.5                     |
| Eastern Mediterranean | 177                        | 915 (0.6)                      | 19.3 (16.9-22.0)                                | 19.3 (16.9-22.0)                              | 177                              | 915-915                    | 1                | 1 (0.9)                                   | -                        |
| Europe                | 127                        | 1,840 (1.1)                    | 8.8 (3.2-16.6)                                  | 5.4 (0.8-13.3)                                | 8                                | 31-558                     | 7                | 9 (8.0)                                   | 96.7                     |
| South-East Asia       | 801                        | 14,724 (9.1)                   | 5.3 (4.3-6.4)                                   | 5.0 (4.1-6.1)                                 | 33                               | 200-3,739                  | 5                | 16 (14.2)                                 | 85.8                     |
| Western Pacific       | 15,369                     | 134,624 (82.9)                 | 12.4 (11.3-13.6)                                | 11.7 (10.6-12.9)                              | 68                               | 50-47,231                  | 8                | 66 (58.4)                                 | 97.3                     |
| Sub-total             | 17,287                     | 162,457 (100)                  | 10.0 (9.0-11.0)                                 | 9.1 (8.1-10.2)                                | 54                               | 31-47,231                  | 36               | 113 (100)                                 | 97.8                     |
| <b>2000-2004</b>      |                            |                                |                                                 |                                               |                                  |                            |                  |                                           |                          |
| Americas              | 1,156                      | 9,177 (39.2)                   | 10.1 (6.7-14.0)                                 | 9.9 (6.6-13.8)                                | 60                               | 85-3,280                   | 3                | 11 (34.4)                                 | 96.6                     |
| Africa                | 21                         | 442 (1.9)                      | 4.8 (3.1-7.2)                                   | 4.8 (3.1-7.2)                                 | 21                               | 442-442                    | 1                | 1 (3.1)                                   | -                        |
| Eastern Mediterranean | 306                        | 1,174 (5.0)                    | 25.8 (23.3-28.3)                                | 25.8 (23.3-28.3)                              | 153                              | 388-786                    | 1                | 2 (6.3)                                   | -                        |
| Europe                | 119                        | 2,474 (10.6)                   | 7.1 (3.5-11.8)                                  | 3.1 (1.0-6.3)                                 | 21                               | 99-1,387                   | 4                | 5 (15.6)                                  | 89.7                     |
| South-East Asia       | 639                        | 7,407 (31.6)                   | 7.6 (3.9-12.4)                                  | 6.5 (2.9-11.3)                                | 65                               | 110-2,399                  | 5                | 7 (21.9)                                  | 97.8                     |
| Western Pacific       | 173                        | 2,746 (11.7)                   | 7.4 (3.8-12.1)                                  | 7.4 (3.8-12.1)                                | 23                               | 144-1,396                  | 3                | 6 (18.8)                                  | 92.7                     |
| Sub-total             | 2,414                      | 23,420 (100)                   | 9.2 (7.0-11.8)                                  | 8.1 (5.9-10.6)                                | 41                               | 85-3,280                   | 17               | 32 (100)                                  | 97.6                     |

\*Heterogeneity between subgroups in all subgroup analyses except for the period 2015-2020 had a P value <0.001, while the period 2015-2020 had a P value of 0.07.

**Table S5.** Sensitivity and specificity of HIV diagnostic tests

| Diagnostic tests                                       | Sensitivity (%) | Specificity (%) | No. of data points | No. of MSM tested |
|--------------------------------------------------------|-----------------|-----------------|--------------------|-------------------|
| ≥ 2 HIV diagnostics                                    | ~100            | ~100            | 305                | 586,139           |
| NAAT/ PCR                                              | 100             | 100             | 1                  | 382               |
| EIA/ ELISA (overall) <sup>13</sup>                     | 100             | 99.4~100        | 7                  | 2,677             |
| Genscreen ULTRA HIV Ag-Ab <sup>14</sup>                | 100             | 98.7~100        | 1                  | 397               |
| Rapid test (overall) <sup>13</sup>                     | 97.6~100        | 97.6~100        | 1                  | 423               |
| Abbott Determine HIV-1/2 <sup>13</sup>                 | 100             | 99.4            | 1                  | 171               |
| Alere Determine HIV-1/2 Ag/Ab rapid test <sup>13</sup> | 100             | 98.9            | 1                  | 788               |
| Hexagon HIV <sup>15</sup>                              | 99.0            | 99.0            | 1                  | 400               |
| Murex HIV Ag/Ab combination <sup>13</sup>              | 100             | 99.3            | 1                  | 300               |
| Uni-Gold HIV-1/2 <sup>13</sup>                         | 99.8~100        | 99.9~100        | 1                  | 2,296             |
| HIV antibody/ No information about HIV diagnostic      | 97.6~100        | 97.6~100        | 11                 | 6,145             |

EIA: enzyme immunoassay, ELISA: enzyme-linked immunosorbent assay, NAAT: nucleic acid amplification techniques, PCR: polymerase chain reaction



**Table S6.** Pooled syphilis prevalence estimates among MSM in regions of the Sustainable Development Goals between 2000-2020 in five-year intervals

| SDG regions                                   | No. of MSM tested positive | No. of MSM tested (% of total) | Uncorrected pooled prevalence estimates (95%CI) | Corrected pooled prevalence estimates (95%CI) | Median no. of positive diagnoses | Range of study sample size | No. of countries | No. of point prevalence data (% of total) | Heterogeneity $I^2$ (%)* |
|-----------------------------------------------|----------------------------|--------------------------------|-------------------------------------------------|-----------------------------------------------|----------------------------------|----------------------------|------------------|-------------------------------------------|--------------------------|
| <b>2015-2020</b>                              |                            |                                |                                                 |                                               |                                  |                            |                  |                                           |                          |
| Australia and New Zealand                     | -                          | -                              | -                                               | -                                             | -                                | -                          | 0                | 0 (0)                                     | -                        |
| Central and Southern Asia                     | 90                         | 4,471 (11.1)                   | 3.0 (1.2-5.6)                                   | 2.4 (0.7-5.0)                                 | 12                               | 42-1,573                   | 6                | 7 (14.3)                                  | 94.1                     |
| Eastern and South-Eastern Asia                | 1,619                      | 21,427 (53.1)                  | 7.7 (6.1-9.5)                                   | 7.3 (5.6-9.1)                                 | 43                               | 102-3,613                  | 4                | 19 (38.8)                                 | 95.5                     |
| Europe and Northern America                   | 264                        | 4,309 (10.7)                   | 8.3 (2.5-17.0)                                  | 6.2 (1.2-14.4)                                | 38                               | 200-2,296                  | 3                | 6 (12.2)                                  | 98.5                     |
| Latin America and the Caribbean               | 598                        | 4,215 (10.4)                   | 16.8 (9.3-26.0)                                 | 14.0 (6.8-23.2)                               | 84                               | 83-1,398                   | 5                | 7 (14.3)                                  | 98.2                     |
| Northern Africa and Western Asia              | 203                        | 2,136 (5.3)                    | 6.9 (0.23-5)                                    | 6.3 (0.1-21.0)                                | 32                               | 400-700                    | 2                | 4 (8.2)                                   | 99.1                     |
| Oceania (excluding Australia and New Zealand) | 49                         | 899 (2.2)                      | 4.8 (3.4-6.4)                                   | 4.8 (3.4-6.4)                                 | 24.5                             | 39-860                     | 2                | 2 (4.1)                                   | -                        |
| Sub-Saharan Africa                            | 151                        | 2,900 (7.2)                    | 8.4 (0.5-23.8)                                  | 7.6 (0.1-24.1)                                | 29.5                             | 109-1,288                  | 4                | 4 (8.2)                                   | 99.3                     |
| <b>Total</b>                                  | <b>2,974</b>               | <b>40,357 (100)</b>            | <b>7.9 (6.0-9.9)</b>                            | <b>6.9 (5.1-8.9)</b>                          | <b>38</b>                        | <b>39-3,613</b>            | <b>26</b>        | <b>49 (100)</b>                           | <b>98.2</b>              |
| <b>2010-2014</b>                              |                            |                                |                                                 |                                               |                                  |                            |                  |                                           |                          |
| Australia and New Zealand                     | 11                         | 915 (0.2)                      | 1.1 (0.4-1.9)                                   | 1.1 (0.4-1.9)                                 | 4                                | 98-617                     | 1                | 3 (2.0)                                   | -                        |
| Central and Southern Asia                     | 545                        | 16,507 (4.3)                   | 3.6 (2.0-5.6)                                   | 3.3 (1.9-5.0)                                 | 26                               | 207-11,997                 | 5                | 6 (4.0)                                   | 93.8                     |
| Eastern and South-Eastern Asia                | 26,211                     | 333,431 (87.7)                 | 8.5 (7.9-9.1)                                   | 7.9 (7.3-8.5)                                 | 78                               | 151-42,680                 | 8                | 88 (58.3)                                 | 97.5                     |
| Europe and Northern America                   | 306                        | 4,010 (1.1)                    | 5.8 (2.2-10.7)                                  | 3.5 (0.8-7.8)                                 | 9                                | 43-442                     | 10               | 15 (9.9)                                  | 97.1                     |
| Latin America and the Caribbean               | 1,651                      | 12,492 (3.3)                   | 10.5 (7.4-14.0)                                 | 10.2 (6.9-14.0)                               | 33                               | 62-5,101                   | 11               | 17 (11.3)                                 | 97.2                     |
| Northern Africa and Western Asia              | 322                        | 2,519 (0.7)                    | 11.1 (4.0-21.1)                                 | 9.7 (3.1-19.4)                                | 68                               | 216-662                    | 4                | 7 (4.6)                                   | 98.0                     |
| Oceania (excluding Australia and New Zealand) | 1                          | 39 (0.01)                      | 2.6 (0.5-13.2)                                  | 2.6 (0.5-13.2)                                | 1                                | 39-39                      | 1                | 1 (0.7)                                   | -                        |
| Sub-Saharan Africa                            | 345                        | 10,085 (2.7)                   | 2.2 (1.3-3.4)                                   | 1.3 (0.6-2.1)                                 | 7                                | 205-2,442                  | 11               | 14 (9.3)                                  | 89.9                     |
| <b>Sub-total</b>                              | <b>29,392</b>              | <b>379,998 (100)</b>           | <b>7.4 (6.8-8.0)</b>                            | <b>6.5 (5.9-7.1)</b>                          | <b>44</b>                        | <b>39-42,680</b>           | <b>51</b>        | <b>151 (100)</b>                          | <b>98.0</b>              |
| <b>2005-2009</b>                              |                            |                                |                                                 |                                               |                                  |                            |                  |                                           |                          |
| Australia and New Zealand                     | 7                          | 183 (0.1)                      | 3.8 (1.9-7.7)                                   | 2.6 (1.1-6.0)                                 | 7                                | 183-183                    | 1                | 1 (0.9)                                   | -                        |
| Central and Southern Asia                     | 576                        | 8,694 (5.4)                    | 5.7 (2.9-9.3)                                   | 5.7 (2.9-9.3)                                 | 58                               | 400-3,739                  | 4                | 7 (6.2)                                   | 97.3                     |
| Eastern and South-Eastern Asia                | 15,763                     | 141,286 (87.0)                 | 11.7 (10.7-12.8)                                | 11.1 (10.0-12.2)                              | 65                               | 50-47,231                  | 8                | 74 (65.5)                                 | 97.3                     |
| Europe and Northern America                   | 73                         | 2,380 (1.5)                    | 3.5 (1.2-6.7)                                   | 1.9 (0.2-4.9)                                 | 6                                | 31-850                     | 6                | 7 (6.2)                                   | 91.6                     |
| Latin America and the Caribbean               | 740                        | 6,877 (4.2)                    | 10.1 (6.0-15.0)                                 | 9.0 (4.5-14.6)                                | 54                               | 78-833                     | 9                | 15 (13.3)                                 | 98.1                     |
| Northern Africa and Western Asia              | 71                         | 310 (0.2)                      | 21.1 (7.7-38.7)                                 | 14.7 (0.46-6)                                 | 19                               | 70-140                     | 2                | 3 (2.7)                                   | -                        |
| Oceania (excluding Australia and New Zealand) | 1                          | 100 (0.1)                      | 1.0 (0.2-5.4)                                   | 1.0 (0.2-5.4)                                 | 1                                | 100-100                    | 1                | 1 (0.9)                                   | -                        |
| Sub-Saharan Africa                            | 56                         | 2,627 (1.6)                    | 2.0 (0.1-5.7)                                   | 1.7 (0.5-6)                                   | 7                                | 290-879                    | 5                | 5 (4.4)                                   | 96.5                     |
| <b>Sub-total</b>                              | <b>17,287</b>              | <b>162,457 (100)</b>           | <b>10.0 (9.0-11.0)</b>                          | <b>9.1 (8.1-10.2)</b>                         | <b>54</b>                        | <b>31-47,231</b>           | <b>36</b>        | <b>113 (100)</b>                          | <b>97.8</b>              |
| <b>2000-2004</b>                              |                            |                                |                                                 |                                               |                                  |                            |                  |                                           |                          |
| Australia and New Zealand                     | 42                         | 1,396 (6.0)                    | 3.0 (2.2-4.0)                                   | 3.0 (2.2-4.0)                                 | 42                               | 1,396-1,396                | 1                | 1 (3.1)                                   | -                        |
| Central and Southern Asia                     | 797                        | 7,704 (32.9)                   | 10.1 (4.6-17.4)                                 | 8.8 (3.6-16.0)                                | 99                               | 132-2,399                  | 4                | 7 (21.9)                                  | 98.8                     |
| Eastern and South-Eastern Asia                | 279                        | 2,227 (9.5)                    | 10.7 (7.4-14.5)                                 | 10.7 (7.4-14.5)                               | 21                               | 110-767                    | 4                | 7 (21.9)                                  | 85.1                     |
| Europe and Northern America                   | 120                        | 2,919 (12.5)                   | 5.4 (2.2-9.7)                                   | 2.4 (0.7-5.1)                                 | 17                               | 99-1,387                   | 5                | 6 (18.8)                                  | 91.3                     |
| Latin America and the Caribbean               | 1,155                      | 8,732 (37.3)                   | 11.9 (9.2-14.9)                                 | 11.7 (9.0-14.7)                               | 84.5                             | 85-3,280                   | 2                | 10 (31.3)                                 | 93.1                     |
| Northern Africa and Western Asia              | -                          | -                              | -                                               | -                                             | -                                | -                          | 0                | 0 (0)                                     | -                        |
| Oceania (excluding Australia and New Zealand) | -                          | -                              | -                                               | -                                             | -                                | -                          | 0                | 0 (0)                                     | -                        |
| Sub-Saharan Africa                            | 21                         | 442 (1.9)                      | 4.8 (3.1-7.2)                                   | 4.8 (3.1-7.2)                                 | 21                               | 442-442                    | 1                | 1 (3.1)                                   | -                        |
| <b>Sub-total</b>                              | <b>2,414</b>               | <b>23,420 (100)</b>            | <b>9.2 (7.0-11.8)</b>                           | <b>8.1 (5.9-10.6)</b>                         | <b>41</b>                        | <b>85-3,280</b>            | <b>17</b>        | <b>32 (100)</b>                           | <b>97.6</b>              |

\*Heterogeneity between subgroups in all sub-group analyses had a  $P$  value <0.05

**Table S7.** Pooled syphilis prevalence estimates among MSM by country between 2000-2020

| Country            | No. of point prevalence data | Corrected pooled Prevalence estimates | 95% CI    |
|--------------------|------------------------------|---------------------------------------|-----------|
| Afghanistan        | 1                            | 13.3                                  | 9.3-18.6  |
| Angola             | 1                            | 0                                     | 0-1.2     |
| Argentina          | 5                            | 20.5                                  | 10.6-32.7 |
| Armenia            | 5                            | 1.1                                   | 0.4-2.1   |
| Australia          | 5                            | 1.9                                   | 1.0-3.1   |
| Azerbaijan         | 2                            | 3.7                                   | 2.2-5.4   |
| Bangladesh         | 8                            | 4.2                                   | 2.1-6.9   |
| Belgium            | 1                            | 7.5                                   | 4.6-12.0  |
| Belize             | 1                            | 0.8                                   | 0.1-4.3   |
| Bhutan             | 1                            | 9.5                                   | 3.8-22.1  |
| Bolivia            | 1                            | 8.9                                   | 7.1-11.0  |
| Bosnia-Herzegovina | 2                            | 0                                     | 0-0.4     |
| Botswana           | 1                            | 2.7                                   | 1.5-4.6   |
| Brazil             | 9                            | 12.5                                  | 4.7-23.3  |
| Burkina Faso       | 1                            | 6.6                                   | 5.0-8.8   |
| Cambodia           | 2                            | 1.8                                   | 0.9-2.9   |
| Cameroon           | 1                            | 0.4                                   | 0.1-1.4   |
| Canada             | 1                            | 9.7                                   | 5.1-17.8  |
| China              | 153                          | 9.7                                   | 9.2-10.3  |
| Costa Rica         | 1                            | 18.0                                  | 14.1-22.7 |
| Cote d'Ivoire      | 1                            | 0                                     | 0-0.3     |
| Croatia            | 3                            | 4.7                                   | 0.6-12.1  |
| Dominican Republic | 1                            | 13.0                                  | 7.8-21.0  |
| Ecuador            | 3                            | 7.6                                   | 5.0-10.6  |
| El Salvador        | 2                            | 11.7                                  | 10.1-13.4 |
| Estonia            | 1                            | 0                                     | 0-8.2     |
| Gambia             | 1                            | 0.5                                   | 0.1-2.7   |
| Georgia            | 6                            | 26.5                                  | 16.4-38.1 |
| Guatemala          | 2                            | 0.8                                   | 0.3-1.5   |
| Guyana             | 1                            | 0                                     | 0-1.0     |
| Haiti              | 2                            | 11.0                                  | 9.6-12.6  |
| Honduras           | 1                            | 8.0                                   | 6.2-10.3  |
| India              | 5                            | 4.7                                   | 2.7-7.3   |
| Indonesia          | 3                            | 15.3                                  | 12.7-18.0 |
| Italy              | 1                            | 5.5                                   | 3.4-8.8   |
| Jamaica            | 2                            | 5.4                                   | 3.0-8.4   |
| Japan              | 1                            | 4.9                                   | 3.3-7.4   |
| Kenya              | 2                            | 1.2                                   | 0.6-1.9   |
| Lesotho            | 1                            | 11.2                                  | 9.2-13.5  |
| Liberia            | 1                            | 1.0                                   | 0.3-3.5   |
| Macedonia          | 2                            | 0.4                                   | 0-1.0     |
| Malawi             | 3                            | 0.6                                   | 0.3-1.0   |
| Malaysia           | 1                            | 28.3                                  | 22.4-35.2 |
| Mauritius          | 2                            | 12.7                                  | 9.8-15.9  |
| Mexico             | 2                            | 9.2                                   | 7.8-10.7  |
| Moldova            | 3                            | 2.9                                   | 1.5-4.6   |
| Mongolia           | 3                            | 10.3                                  | 2.9-21.4  |
| Morocco            | 1                            | 11.0                                  | 8.9-13.6  |
| Myanmar            | 6                            | 2.4                                   | 0.2-6.6   |
| Nepal              | 6                            | 2.6                                   | 1.8-3.6   |
| Netherlands        | 1                            | 0                                     | 0-1.0     |
| Nicaragua          | 1                            | 8.3                                   | 6.4-10.7  |
| Nigeria            | 1                            | 0                                     | 0-0.4     |
| Pakistan           | 3                            | 25.0                                  | 16.9-34.2 |
| Panama             | 1                            | 23.4                                  | 20.2-26.9 |
| Papua New Guinea   | 1                            | 5.7                                   | 4.3-7.5   |
| Peru               | 14                           | 12.3                                  | 10.0-14.7 |
| Philippines        | 1                            | 0                                     | 0-1.3     |
| Republic of Korea  | 1                            | 19.1                                  | 12.8-27.5 |
| Russia             | 5                            | 4.8                                   | 0.1-14.7  |
| Senegal            | 2                            | 4.0                                   | 2.8-5.4   |
| Serbia             | 2                            | 3.0                                   | 1.8-4.6   |
| Solomon Islands    | 1                            | 0                                     | 0-9.0     |
| Spain              | 2                            | 2.3                                   | 1.6-3.2   |
| Sri Lanka          | 2                            | 0.6                                   | 0.3-0.9   |
| Switzerland        | 1                            | 4.3                                   | 3.0-6.3   |
| Tajikistan         | 1                            | 0                                     | 0-0.8     |
| Tanzania           | 3                            | 0.4                                   | 0-1.4     |
| Thailand           | 10                           | 7.0                                   | 4.7-9.7   |
| Timor-Leste        | 2                            | 3.2                                   | 1.6-5.1   |
| Togo               | 2                            | 0.3                                   | 0.1-0.7   |
| Tonga              | 1                            | 1.0                                   | 0.2-5.4   |
| Uganda             | 1                            | 10.3                                  | 7.3-14.4  |
| United Kingdom     | 1                            | 0                                     | 0-1.0     |
| United States      | 8                            | 6.9                                   | 1.8-14.9  |
| Vanuatu            | 1                            | 2.6                                   | 0.5-13.2  |
| Viet Nam           | 4                            | 3.5                                   | 1.0-7.3   |

**Table S8.** Individual studies identified by systematic review containing syphilis prevalence estimates among MSM

| Study                                 | Country     | Study year(s) | Income level | Study design    | Sampling method* | Diagnostic method    | HIV prevalence (crude) | No. syphilis positive | No. syphilis tested | Syphilis prevalence (crude)† | Axis score |
|---------------------------------------|-------------|---------------|--------------|-----------------|------------------|----------------------|------------------------|-----------------------|---------------------|------------------------------|------------|
| <b>Australia and New Zealand</b>      |             |               |              |                 |                  |                      |                        |                       |                     |                              |            |
| Jin, 2007 <sup>16</sup>               | Australia   | 2001-2004     | High         | Cross-sectional | Convenience      | TPPA+FTA-ABS         | 0.0%                   | 42                    | 1396                | 3.0%                         | 12         |
| Lee, 2010 <sup>17</sup>               | Australia   | 2009          | High         | Cross-sectional | Convenience      | POCT                 | -                      | 7                     | 183                 | 3.8%                         | 9          |
| Read, 2013 <sup>18</sup>              | Australia   | 2010-2011     | High         | Cross-sectional | Convenience      | RPR+TPPA+FTA-ABS     | -                      | 1                     | 98                  | 1.0%                         | 13         |
| Zou, 2014 <sup>19</sup>               | Australia   | 2010-2012     | High         | Cross-sectional | Convenience      | RPR+EIA              | 0.0%                   | 4                     | 200                 | 2.0%                         | 11         |
| Goddard, 2019 <sup>20</sup>           | Australia   | 2010-2015     | High         | Cohort          | Convenience      | RPR≥1:4+TPPA+FTA-ABS | 35.8%                  | 6                     | 617                 | 1.0%                         | 12         |
| <b>Central and Southern Asia</b>      |             |               |              |                 |                  |                      |                        |                       |                     |                              |            |
| MOH, 2012 <sup>21</sup>               | Afghanistan | 2012          | Low          | Cross-sectional | RDS              | POCT                 | 0.5%                   | 36                    | 207                 | 17.4%                        | 15         |
| MOH, 2002 <sup>22</sup>               | Bangladesh  | 2002          | Low          | Cross-sectional | Convenience      | RPR+TPHA             | 0.2%                   | 316                   | 2399                | 13.2%                        | 14         |
| MOH, 2007 <sup>23</sup>               | Bangladesh  | 2003-2004     | Low          | Cross-sectional | Convenience      | RPR≥1:8+TPHA/TPPA    | 0.1%                   | 99                    | 2276                | 4.3%                         | 14         |
| MOH, 2005 <sup>24</sup>               | Bangladesh  | 2004-2005     | Low          | Cross-sectional | Convenience      | RPR≥1:8+TPPA         | 0.4%                   | 65                    | 1365                | 4.8%                         | 14         |
| MOH, 2007 <sup>25</sup>               | Bangladesh  | 2006          | Low          | Cross-sectional | Convenience      | RPR≥1:8+TPPA         | 0.5%                   | 38                    | 1038                | 3.7%                         | 13         |
| MOH, 2008 <sup>26</sup>               | Bangladesh  | 2007          | Low          | Cross-sectional | Convenience      | RPR≥1:8+TPPA         | 0.2%                   | 58                    | 1481                | 3.9%                         | 14         |
| MOH, 2011 <sup>27</sup>               | Bangladesh  | 2011          | Low          | Cross-sectional | Convenience      | RPR≥1:8+TPPA         | 0.3%                   | 72                    | 1797                | 4.0%                         | 14         |
| Rana, 2016 <sup>28</sup>              | Bangladesh  | 2012          | Low          | Cross-sectional | VCT              | RPR≥1:8+TPPA         | 0.8%                   | 16                    | 889                 | 1.8%                         | 12         |
| MOH, 2017 <sup>29</sup>               | Bangladesh  | 2015          | Lower-middle | Cross-sectional | Convenience      | RPR≥1:8+TPPA         | 0.6%                   | 16                    | 1307                | 1.2%                         | 14         |
| SPMER, 2016 <sup>30</sup>             | Bhutan      | 2016          | Lower-middle | Cross-sectional | RDS              | RPR+TPPA             | 0.0%                   | 4                     | 42                  | 9.5%                         | 13         |
| Schneider, 2010 <sup>31</sup>         | India       | 2004-2005     | Low          | Cross-sectional | Probability      | ELISA                | 7.6%                   | 5                     | 132                 | 3.8%                         | 15         |
| Solomon, 2010 <sup>32</sup>           | India       | 2008          | Lower-middle | Cross-sectional | RDS              | RPR+TPPA             | 9.0%                   | 58                    | 721                 | 8.0%                         | 13         |
| Ramakrishnan, 2015 <sup>33</sup>      | India       | 2009-2010     | Lower-middle | Cross-sectional | TLS              | RPR+TPHA             | 12.5%                  | 228                   | 3739                | 6.1%                         | 14         |
| Solomon, 2015 <sup>34</sup>           | India       | 2012-2013     | Lower-middle | Cross-sectional | RDS              | RPR+TPHA             | 9.6%                   | 401                   | 11997               | 3.3%                         | 11         |
| Das, 2019 <sup>35</sup>               | India       | 2017          | Lower-middle | Cross-sectional | Snowball         | RPR≥1:8              | 3.2%                   | 22                    | 247                 | 8.9%                         | 14         |
| CREHPA, 2005 <sup>36</sup>            | Nepal       | 2004          | Low          | Cross-sectional | RDS              | RPR≥1:8+TPPA         | 3.9%                   | 6                     | 358                 | 1.7%                         | 13         |
| New ERA, 2008 <sup>37</sup>           | Nepal       | 2007          | Low          | Cross-sectional | RDS              | RPR+TPHA             | 3.3%                   | 11                    | 400                 | 2.8%                         | 15         |
| New ERA, 2009 <sup>38</sup>           | Nepal       | 2009          | Low          | Cross-sectional | RDS              | RPR≥1:8+TPHA         | 3.8%                   | 6                     | 400                 | 1.5%                         | 12         |
| MOH, 2013 <sup>39</sup>               | Nepal       | 2012          | Low          | Cross-sectional | RDS              | RPR+TPPA             | 6.3%                   | 10                    | 400                 | 2.5%                         | 17         |
| MOH, 2015 <sup>40</sup>               | Nepal       | 2015          | Low          | Cross-sectional | RDS              | RPR+TPPA             | 5.3%                   | 19                    | 400                 | 4.8%                         | 15         |
| MOH, 2017 <sup>41</sup>               | Nepal       | 2017          | Low          | Cross-sectional | RDS              | RPR+TPPA             | 6.3%                   | 12                    | 400                 | 3.0%                         | 17         |
| MOH, 2005 <sup>42</sup>               | Pakistan    | 2004          | Low          | Cross-sectional | Snowball         | RPR+TPHA             | 2.2%                   | 166                   | 786                 | 21.1%                        | 14         |
| MOH, 2005 <sup>42</sup>               | Pakistan    | 2004          | Low          | Cross-sectional | Probability      | RPR+TPHA             | 1.0%                   | 140                   | 388                 | 36.1%                        | 14         |
| Hawkes, 2009 <sup>43</sup>            | Pakistan    | 2007          | Low          | Cross-sectional | RDS              | RPR+TPHA             | 0.8%                   | 177                   | 915                 | 19.3%                        | 13         |
| NSACP, 2015 <sup>44</sup>             | Sri Lanka   | 2014          | Lower-middle | Cross-sectional | RDS              | VDRL≥16+POCT         | 0.6%                   | 10                    | 1217                | 0.8%                         | 15         |
| NSACP, 2018 <sup>45</sup>             | Sri Lanka   | 2017          | Lower-middle | Cross-sectional | RDS              | VDRL+TPPA            | 0.3%                   | 6                     | 1573                | 0.4%                         | 15         |
| Gulov, 2016 <sup>46</sup>             | Tajikistan  | 2015          | Lower-middle | Cross-sectional | Convenience      | Syphilis antibody    | 2.6%                   | 11                    | 502                 | 2.2%                         | 12         |
| <b>Eastern and South-Eastern Asia</b> |             |               |              |                 |                  |                      |                        |                       |                     |                              |            |
| Girault, 2004 <sup>47</sup>           | Cambodia    | 2000          | Low          | Cross-sectional | TLS              | RPR+TPPA             | 14.1%                  | 11                    | 206                 | 5.3%                         | 14         |
| Sopheab, 2005 <sup>48</sup>           | Cambodia    | 2005          | Low          | Cross-sectional | RDS              | RPR+TPPA             | 5.2%                   | 5                     | 541                 | 0.9%                         | 13         |
| Jiang, 2006 <sup>49</sup>             | China       | 2003          | Lower-middle | Cross-sectional | Convenience      | RPR≥1:8+TPPA         | 0.0%                   | 10                    | 144                 | 6.9%                         | 12         |
| Ma, 2007 <sup>50</sup>                | China       | 2004          | Lower-middle | Cross-sectional | RDS              | RPR+ELISA            | 1.5%                   | 25                    | 325                 | 7.7%                         | 13         |
| He, 2006 <sup>51</sup>                | China       | 2004          | Lower-middle | Cross-sectional | Convenience      | TRUST+ELISA          | 0.0%                   | 21                    | 200                 | 10.5%                        | 9          |
| Choi, 2007 <sup>52</sup>              | China       | 2004-2005     | Lower-middle | Cross-sectional | Snowball         | TRUST+TPPA           | 1.5%                   | 64                    | 475                 | 13.5%                        | 11         |
| Ruan, 2007 <sup>53</sup>              | China       | 2005          | Lower-middle | Cross-sectional | Convenience      | TPPA                 | 3.2%                   | 59                    | 526                 | 11.2%                        | 12         |
| Ma, 2007 <sup>50</sup>                | China       | 2005          | Lower-middle | Cross-sectional | RDS              | RPR+ELISA            | 6.1%                   | 54                    | 427                 | 12.6%                        | 13         |
| Zhang, 2007 <sup>54</sup>             | China       | 2005-2006     | Lower-middle | Cross-sectional | VCT              | RPR+TPHA             | 2.1%                   | 53                    | 753                 | 7.0%                         | 13         |
| Ye, 2012 <sup>55</sup>                | China       | 2006          | Lower-middle | Cross-sectional | Snowball         | RPR+TPPA             | 2.3%                   | 518                   | 5076                | 10.2%                        | 11         |
| Xiao, 2010 <sup>56</sup>              | China       | 2006          | Lower-middle | Cross-sectional | Snowball         | RPR+TPPA             | 2.9%                   | 490                   | 4983                | 9.8%                         | 11         |

| Study                     | Country | Study year(s) | Income level | Study design    | Sampling method* | Diagnostic method | HIV prevalence (crude) | No. syphilis positive | No. syphilis tested | Syphilis prevalence (crude)† | Axis score |
|---------------------------|---------|---------------|--------------|-----------------|------------------|-------------------|------------------------|-----------------------|---------------------|------------------------------|------------|
| Ma, 2007 <sup>50</sup>    | China   | 2006          | Lower-middle | Cross-sectional | RDS              | RPR+ELISA         | 6.9%                   | 54                    | 540                 | 10.0%                        | 13         |
| Zhang, 2012 <sup>57</sup> | China   | 2006          | Lower-middle | Cross-sectional | Snowball         | RPR+TPPA          | 10.9%                  | 89                    | 953                 | 9.3%                         | 13         |
| Zeng, 2014 <sup>58</sup>  | China   | 2006          | Lower-middle | Cross-sectional | Snowball         | ELISA             | 13.0%                  | 54                    | 561                 | 9.6%                         | 12         |
| He, 2009 <sup>59</sup>    | China   | 2006          | Lower-middle | Cross-sectional | RDS              | RPR+ELISA         | 1.7%                   | 20                    | 409                 | 4.9%                         | 11         |
| Wang, 2012 <sup>60</sup>  | China   | 2006          | Lower-middle | Cross-sectional | Snowball         | RPR+TPPA          | 1.0%                   | 37                    | 401                 | 9.2%                         | 13         |
| Guo, 2009 <sup>61</sup>   | China   | 2006          | Lower-middle | Cross-sectional | Convenience      | RPR+TPPA          | 4.7%                   | 79                    | 296                 | 26.7%                        | 10         |
| Xu, 2010 <sup>62</sup>    | China   | 2006          | Lower-middle | Cohort          | Convenience      | RPR+TPPA          | 0.0%                   | 73                    | 218                 | 33.5%                        | 13         |
| Feng, 2008 <sup>63</sup>  | China   | 2005-2007     | Lower-middle | Cross-sectional | Convenience      | TRUST+TPPA        | 3.3%                   | 264                   | 1376                | 19.2%                        | 12         |
| Ruan, 2009 <sup>64</sup>  | China   | 2006-2007     | Lower-middle | Cross-sectional | Convenience      | TPHA              | 4.8%                   | 107                   | 541                 | 19.8%                        | 12         |
| Ye, 2012 <sup>55</sup>    | China   | 2007          | Lower-middle | Cross-sectional | Snowball         | RPR+TPPA          | 3.4%                   | 538                   | 4981                | 10.8%                        | 11         |
| Zheng, 2012 <sup>65</sup> | China   | 2007          | Lower-middle | Cross-sectional | Convenience      | RPR+TPPA          | 2.5%                   | 11                    | 157                 | 7.0%                         | 12         |
| Zou, 2010 <sup>66</sup>   | China   | 2007          | Lower-middle | Cross-sectional | Convenience      | TPPA              | 4.8%                   | 48                    | 420                 | 11.4%                        | 11         |
| Feng, 2010 <sup>67</sup>  | China   | 2007          | Lower-middle | Cross-sectional | Snowball         | ELISA             | 9.1%                   | 144                   | 513                 | 28.1%                        | 11         |
| Xiao, 2009 <sup>68</sup>  | China   | 2007          | Lower-middle | Cross-sectional | Convenience      | RPR+TPPA          | 10.9%                  | 56                    | 742                 | 7.5%                         | 11         |
| Zhang, 2012 <sup>57</sup> | China   | 2007          | Lower-middle | Cross-sectional | Snowball         | RPR+TPPA          | 12.8%                  | 89                    | 1015                | 8.8%                         | 13         |
| Wang, 2012 <sup>60</sup>  | China   | 2007          | Lower-middle | Cross-sectional | Snowball         | RPR+TPPA          | 2.9%                   | 65                    | 419                 | 15.5%                        | 13         |
| Guo, 2013 <sup>69</sup>   | China   | 2007          | Lower-middle | Cohort          | Convenience      | RPR+TPHA          | 8.1%                   | 35                    | 161                 | 21.7%                        | 13         |
| Zhu, 2008 <sup>70</sup>   | China   | 2007          | Lower-middle | Cross-sectional | Convenience      | ELISA             | 3.9%                   | 18                    | 73                  | 24.7%                        | 12         |
| Guo, 2009 <sup>61</sup>   | China   | 2007          | Lower-middle | Cross-sectional | Convenience      | RPR+TPPA          | 8.0%                   | 41                    | 137                 | 29.9%                        | 10         |
| Ye, 2012 <sup>55</sup>    | China   | 2008          | Lower-middle | Cross-sectional | Snowball         | RPR+TPPA          | 4.9%                   | 748                   | 5460                | 13.7%                        | 11         |
| Wang, 2014 <sup>71</sup>  | China   | 2008          | Lower-middle | Cross-sectional | Convenience      | RPR+ELISA         | 1.7%                   | 59                    | 1146                | 5.1%                         | 13         |
| Li, 2011 <sup>72</sup>    | China   | 2008          | Lower-middle | Cross-sectional | Convenience      | TPPA              | 4.5%                   | 161                   | 550                 | 29.3%                        | 12         |
| She, 2013 <sup>73</sup>   | China   | 2008          | Lower-middle | Cross-sectional | Snowball         | RPR+TPPA          | 6.9%                   | 206                   | 1693                | 12.2%                        | 11         |
| Zhang, 2012 <sup>57</sup> | China   | 2008          | Lower-middle | Cross-sectional | Snowball         | RPR+TPPA          | 16.6%                  | 63                    | 743                 | 8.5%                         | 13         |
| Zeng, 2014 <sup>58</sup>  | China   | 2008          | Lower-middle | Cross-sectional | Snowball         | ELISA             | 16.3%                  | 70                    | 602                 | 11.6%                        | 12         |
| Ma, 2016 <sup>74</sup>    | China   | 2008          | Lower-middle | Cross-sectional | RDS              | RPR+TPPA          | 16.2%                  | 72                    | 617                 | 11.7%                        | 13         |
| Zhong, 2014 <sup>75</sup> | China   | 2008          | Lower-middle | Cross-sectional | Snowball         | RPR+TPPA          | 5.0%                   | 66                    | 379                 | 17.4%                        | 14         |
| Wang, 2012 <sup>60</sup>  | China   | 2008          | Lower-middle | Cross-sectional | Snowball         | RPR+TPPA          | 3.5%                   | 65                    | 451                 | 14.4%                        | 13         |
| Yan, 2016 <sup>76</sup>   | China   | 2008          | Lower-middle | Cross-sectional | RDS              | RPR+TPPA          | 4.7%                   | 54                    | 430                 | 12.6%                        | 13         |
| Cai, 2010 <sup>77</sup>   | China   | 2008          | Lower-middle | Cross-sectional | TLS              | RPR+TPPA          | 5.3%                   | 56                    | 394                 | 14.2%                        | 14         |
| Bai, 2011 <sup>78</sup>   | China   | 2008          | Lower-middle | Cross-sectional | Snowball         | RPR/TRUST+TPPA    | 7.1%                   | 42                    | 280                 | 15.0%                        | 11         |
| Xu, 2011 <sup>79</sup>    | China   | 2008-2009     | Lower-middle | Cross-sectional | Convenience      | RPR+TPPA          | 3.0%                   | 22                    | 436                 | 5.0%                         | 13         |
| Wu, 2013 <sup>80</sup>    | China   | 2008-2009     | Lower-middle | Cross-sectional | Snowball         | RPR/TRUST+TPPA    | 4.9%                   | 5552                  | 47231               | 11.8%                        | 13         |
| Chen, 2016 <sup>81</sup>  | China   | 2008-2009     | Lower-middle | Cross-sectional | RDS              | RPR+TPPA          | 7.7%                   | 422                   | 2958                | 14.3%                        | 11         |
| Cao, 2014 <sup>82</sup>   | China   | 2008-2009     | Lower-middle | Cross-sectional | Snowball         | RPR+TPPA          | 8.0%                   | 154                   | 858                 | 17.9%                        | 12         |
| Gao, 2015 <sup>83</sup>   | China   | 2008-2009     | Lower-middle | Cross-sectional | Snowball         | RPR+TPPA          | 6.0%                   | 108                   | 600                 | 18.0%                        | 12         |
| Zhao, 2014 <sup>84</sup>  | China   | 2008-2009     | Lower-middle | Cross-sectional | TLS              | RPR+TPPA          | 7.0%                   | 162                   | 801                 | 20.2%                        | 15         |
| Liao, 2011 <sup>85</sup>  | China   | 2008-2009     | Lower-middle | Cross-sectional | Convenience      | RPR+TPPA          | 2.5%                   | 166                   | 2994                | 5.5%                         | 11         |
| Qin, 2016 <sup>86</sup>   | China   | 2009          | Lower-middle | Cross-sectional | Snowball         | RPR+ELISA         | 5.5%                   | 1586                  | 17431               | 9.1%                         | 12         |
| Ye, 2012 <sup>55</sup>    | China   | 2009          | Lower-middle | Cross-sectional | Snowball         | RPR+TPPA          | 5.3%                   | 692                   | 5326                | 13.0%                        | 11         |
| Wang, 2014 <sup>71</sup>  | China   | 2009          | Lower-middle | Cross-sectional | Convenience      | RPR+ELISA         | 1.3%                   | 90                    | 1351                | 6.7%                         | 13         |
| Fan, 2012 <sup>87</sup>   | China   | 2009          | Lower-middle | Cross-sectional | RDS              | RPR+TPPA          | 7.2%                   | 110                   | 500                 | 22.0%                        | 12         |
| Mao, 2014 <sup>88</sup>   | China   | 2009          | Lower-middle | Cohort          | Convenience      | RPR+TPPA          | 6.6%                   | 162                   | 547                 | 29.6%                        | 12         |
| Li, 2012 <sup>89</sup>    | China   | 2009          | Lower-middle | Cohort          | Convenience      | RPR+TPPA          | 0.0%                   | 131                   | 797                 | 16.4%                        | 12         |
| Chen, 2015 <sup>90</sup>  | China   | 2009          | Lower-middle | Cross-sectional | Snowball         | RPR+TPPA          | 12.3%                  | 61                    | 826                 | 7.4%                         | 12         |
| Zhang, 2012 <sup>91</sup> | China   | 2009          | Lower-middle | Cross-sectional | RDS              | RPR+TPPA          | 11.5%                  | 26                    | 503                 | 5.2%                         | 12         |
| Zhang, 2012 <sup>57</sup> | China   | 2009          | Lower-middle | Cross-sectional | Snowball         | RPR+TPPA          | 19.1%                  | 72                    | 603                 | 11.9%                        | 13         |
| Zhong, 2014 <sup>75</sup> | China   | 2009          | Lower-middle | Cross-sectional | Snowball         | RPR+TPPA          | 3.9%                   | 32                    | 385                 | 8.3%                         | 14         |
| Wang, 2012 <sup>60</sup>  | China   | 2009          | Lower-middle | Cross-sectional | Snowball         | RPR+TPPA          | 5.1%                   | 101                   | 450                 | 22.4%                        | 13         |

| Study                      | Country | Study year(s) | Income level | Study design    | Sampling method* | Diagnostic method | HIV prevalence (crude) | No. syphilis positive | No. syphilis tested | Syphilis prevalence (crude)† | Axis score |
|----------------------------|---------|---------------|--------------|-----------------|------------------|-------------------|------------------------|-----------------------|---------------------|------------------------------|------------|
| Yang, 2014 <sup>92</sup>   | China   | 2009          | Lower-middle | Cross-sectional | Convenience      | TRUST+ELISA       | 14.7%                  | 178                   | 839                 | 21.2%                        | 13         |
| Jia, 2015 <sup>93</sup>    | China   | 2007-2012     | Lower-middle | Cohort          | Convenience      | RPR+TPPA          | 8.4%                   | 481                   | 5800                | 8.3%                         | 12         |
| Li, 2016 <sup>94</sup>     | China   | 2009-2010     | Lower-middle | Cohort          | Convenience      | RPR+TPPA          | 6.3%                   | 170                   | 962                 | 17.7%                        | 12         |
| Wang, 2014 <sup>95</sup>   | China   | 2009-2010     | Lower-middle | Cohort          | Snowball         | TRUST+ELISA/TPPA  | 10.5%                  | 118                   | 622                 | 19.0%                        | 15         |
| Huan, 2011 <sup>96</sup>   | China   | 2010          | Upper-middle | Cross-sectional | Snowball         | TRUST≥1:8+ELISA   | -                      | 44                    | 328                 | 13.4%                        | 11         |
| Qin, 2016 <sup>86</sup>    | China   | 2010          | Upper-middle | Cross-sectional | Snowball         | RPR+ELISA         | 5.7%                   | 2940                  | 34191               | 8.6%                         | 12         |
| Luo, 2012 <sup>97</sup>    | China   | 2010          | Upper-middle | Cross-sectional | Snowball         | RPR+TPPA          | 8.2%                   | 44                    | 1118                | 3.9%                         | 11         |
| Chen, 2017 <sup>98</sup>   | China   | 2010          | Upper-middle | Cross-sectional | Snowball         | TRUST+ELISA       | 8.9%                   | 410                   | 3061                | 13.4%                        | 13         |
| Hu, 2017 <sup>99</sup>     | China   | 2010          | Upper-middle | Cross-sectional | Snowball         | RPR+ELISA         | 1.0%                   | 145                   | 3087                | 4.7%                         | 12         |
| Wang, 2014 <sup>71</sup>   | China   | 2010          | Upper-middle | Cross-sectional | Convenience      | RPR+ELISA         | 3.2%                   | 99                    | 1257                | 7.9%                         | 13         |
| Zhang, 2013 <sup>100</sup> | China   | 2010          | Upper-middle | Cross-sectional | Snowball         | RPR+ELISA         | 9.9%                   | 58                    | 302                 | 19.2%                        | 13         |
| Zeng, 2014 <sup>58</sup>   | China   | 2010          | Upper-middle | Cross-sectional | Snowball         | TRUST+ELISA       | 12.5%                  | 25                    | 400                 | 6.3%                         | 12         |
| Zhong, 2014 <sup>75</sup>  | China   | 2010          | Upper-middle | Cross-sectional | Snowball         | RPR+TPPA          | 7.7%                   | 28                    | 405                 | 6.9%                         | 14         |
| Wu, 2016 <sup>101</sup>    | China   | 2010          | Upper-middle | Cross-sectional | Convenience      | TPPA              | 3.4%                   | 23                    | 522                 | 4.4%                         | 13         |
| Wang, 2012 <sup>60</sup>   | China   | 2010          | Upper-middle | Cross-sectional | Snowball         | RPR+TPPA          | 7.5%                   | 65                    | 413                 | 15.7%                        | 13         |
| Xu, 2013 <sup>102</sup>    | China   | 2009-2011     | Upper-middle | Cohort          | Convenience      | RPR+TPPA          | 0.0%                   | 22                    | 378                 | 5.8%                         | 13         |
| Zhao, 2015 <sup>103</sup>  | China   | 2010          | Upper-middle | Cross-sectional | RDS              | RPR+TPPA          | 9.5%                   | 122                   | 621                 | 19.6%                        | 15         |
| Zhao, 2015 <sup>103</sup>  | China   | 2010          | Upper-middle | Cross-sectional | TLS              | RPR+TPPA          | 9.4%                   | 75                    | 533                 | 14.1%                        | 17         |
| Zhou, 2011 <sup>104</sup>  | China   | 2010          | Upper-middle | Cross-sectional | Snowball         | RPR+TPPA          | 2.3%                   | 43                    | 400                 | 10.8%                        | 9          |
| Liu, 2013 <sup>105</sup>   | China   | 2010          | Upper-middle | Cross-sectional | Convenience      | ELISA             | 13.1%                  | 40                    | 388                 | 10.3%                        | 12         |
| Tao, 2013 <sup>106</sup>   | China   | 2010-2011     | Upper-middle | Cross-sectional | Snowball         | RPR+ELISA         | 5.4%                   | 150                   | 894                 | 16.8%                        | 11         |
| Fan, 2014 <sup>107</sup>   | China   | 2010-2011     | Upper-middle | Cross-sectional | Snowball         | RPR+TPPA          | 5.3%                   | 148                   | 887                 | 16.7%                        | 11         |
| Zhang, 2015 <sup>108</sup> | China   | 2009-2012     | Upper-middle | Cross-sectional | Snowball         | RPR+TPPA          | 7.9%                   | 187                   | 1230                | 15.2%                        | 13         |
| Huang, 2014 <sup>109</sup> | China   | 2009-2012     | Upper-middle | Cross-sectional | RDS              | RPR+TPPA          | 15.4%                  | 61                    | 1239                | 4.9%                         | 11         |
| Cai, 2014 <sup>110</sup>   | China   | 2009-2012     | Upper-middle | Cross-sectional | Snowball         | TRUST+TPPA        | 8.0%                   | 179                   | 813                 | 22.0%                        | 10         |
| Wang, 2012 <sup>111</sup>  | China   | 2011          | Upper-middle | Cross-sectional | Snowball         | RPR/TRUST+ELISA   | 6.3%                   | 2902                  | 37084               | 7.8%                         | 10         |
| Qin, 2016 <sup>86</sup>    | China   | 2011          | Upper-middle | Cross-sectional | Snowball         | RPR+ELISA         | 6.3%                   | 2894                  | 37099               | 7.8%                         | 12         |
| Qi, 2015 <sup>112</sup>    | China   | 2011          | Upper-middle | Cross-sectional | Convenience      | RPR+rapid test    | 6.3%                   | 2189                  | 32701               | 6.7%                         | 12         |
| Chen, 2017 <sup>98</sup>   | China   | 2011          | Upper-middle | Cross-sectional | Snowball         | TRUST+ELISA       | 7.9%                   | 300                   | 3337                | 9.0%                         | 13         |
| Lan, 2014 <sup>113</sup>   | China   | 2011          | Upper-middle | Cross-sectional | Convenience      | RPR/TRUST+TPPA    | 3.0%                   | 53                    | 462                 | 11.5%                        | 10         |
| Hu, 2016 <sup>114</sup>    | China   | 2011          | Upper-middle | Cross-sectional | Convenience      | TRUST+ELISA       | 8.1%                   | 249                   | 2433                | 10.2%                        | 12         |
| Hu, 2017 <sup>99</sup>     | China   | 2011          | Upper-middle | Cross-sectional | Snowball         | RPR+ELISA         | 1.9%                   | 156                   | 3192                | 4.9%                         | 12         |
| Wang, 2014 <sup>71</sup>   | China   | 2011          | Upper-middle | Cross-sectional | Convenience      | RPR+ELISA         | 2.7%                   | 81                    | 1314                | 6.2%                         | 13         |
| Wang, 2016 <sup>115</sup>  | China   | 2011          | Upper-middle | Cross-sectional | RDS              | RPR+TPPA          | 19.2%                  | 16                    | 391                 | 4.1%                         | 11         |
| Zhong, 2014 <sup>75</sup>  | China   | 2011          | Upper-middle | Cross-sectional | Snowball         | RPR+TPPA          | 9.3%                   | 25                    | 400                 | 6.3%                         | 14         |
| Luo, 2015 <sup>116</sup>   | China   | 2011          | Upper-middle | Cross-sectional | Snowball         | RPR+TPHA          | 10.4%                  | 37                    | 259                 | 14.3%                        | 13         |
| Zhang, 2013 <sup>117</sup> | China   | 2011          | Upper-middle | Cross-sectional | Snowball         | RPR+TPPA          | 9.5%                   | 66                    | 463                 | 14.3%                        | 13         |
| Liao, 2014 <sup>118</sup>  | China   | 2011          | Upper-middle | Cross-sectional | Convenience      | RPR+TPPA          | 1.6%                   | 84                    | 1228                | 6.8%                         | 13         |
| Wu, 2018 <sup>119</sup>    | China   | 2011          | Upper-middle | Cross-sectional | Snowball         | RPR+ELISA         | 3.8%                   | 28                    | 400                 | 7.0%                         | 11         |
| Fan, 2016 <sup>120</sup>   | China   | 2011-2012     | Upper-middle | Cross-sectional | Convenience      | TPPA              | 19.2%                  | 16                    | 391                 | 4.1%                         | 11         |
| Pan, 2016 <sup>121</sup>   | China   | 2009-2014     | Upper-middle | Cross-sectional | VCT              | RPR+TPPA          | 11.9%                  | 232                   | 1981                | 11.7%                        | 12         |
| Qu, 2016 <sup>122</sup>    | China   | 2012          | Upper-middle | Cross-sectional | Snowball         | TRUST+ELISA       | 6.8%                   | 381                   | 1611                | 23.6%                        | 12         |
| Qin, 2016 <sup>86</sup>    | China   | 2012          | Upper-middle | Cross-sectional | Snowball         | RPR+ELISA         | 6.7%                   | 2993                  | 39910               | 7.5%                         | 12         |
| Chen, 2017 <sup>98</sup>   | China   | 2012          | Upper-middle | Cross-sectional | Snowball         | TRUST+ELISA       | 9.6%                   | 298                   | 4380                | 6.8%                         | 13         |
| Hu, 2016 <sup>114</sup>    | China   | 2012          | Upper-middle | Cross-sectional | Convenience      | TRUST+ELISA       | 9.6%                   | 196                   | 2678                | 7.3%                         | 12         |
| Hu, 2017 <sup>99</sup>     | China   | 2012          | Upper-middle | Cross-sectional | Snowball         | RPR+ELISA         | 2.2%                   | 170                   | 3202                | 5.3%                         | 12         |
| Liang, 2014 <sup>123</sup> | China   | 2012          | Upper-middle | Cross-sectional | Snowball         | TRUST+EIA         | 11.1%                  | 147                   | 2783                | 5.3%                         | 10         |
| Wang, 2014 <sup>71</sup>   | China   | 2012          | Upper-middle | Cross-sectional | Convenience      | RPR+ELISA         | 3.7%                   | 109                   | 1301                | 8.4%                         | 13         |

| Study                         | Country   | Study year(s) | Income level | Study design    | Sampling method* | Diagnostic method | HIV prevalence (crude) | No. syphilis positive | No. syphilis tested | Syphilis prevalence (crude)† | Axis score |
|-------------------------------|-----------|---------------|--------------|-----------------|------------------|-------------------|------------------------|-----------------------|---------------------|------------------------------|------------|
| Zeng, 2014 <sup>58</sup>      | China     | 2012          | Upper-middle | Cross-sectional | Snowball         | TRUST+ELISA       | 19.5%                  | 11                    | 390                 | 2.8%                         | 12         |
| Zhong, 2014 <sup>75</sup>     | China     | 2012          | Upper-middle | Cross-sectional | Snowball         | RPR+TPPA          | 10.0%                  | 36                    | 401                 | 9.0%                         | 14         |
| Yan, 2016 <sup>76</sup>       | China     | 2012          | Upper-middle | Cross-sectional | RDS              | RPR+TPPA          | 9.2%                   | 67                    | 589                 | 11.4%                        | 13         |
| Chu, 2018 <sup>124</sup>      | China     | 2011-2013     | Upper-middle | Cohort          | Snowball         | RPR+TPPA          | 9.1%                   | 69                    | 657                 | 10.5%                        | 12         |
| Wu, 2018 <sup>119</sup>       | China     | 2012          | Upper-middle | Cross-sectional | Snowball         | RPR+ELISA         | 7.3%                   | 25                    | 400                 | 6.3%                         | 11         |
| Mao, 2018 <sup>125</sup>      | China     | 2012-2013     | Upper-middle | Cross-sectional | Convenience      | RPR+TPPA          | 9.9%                   | 381                   | 4496                | 8.5%                         | 14         |
| Xu, 2014 <sup>126</sup>       | China     | 2012-2013     | Upper-middle | Cross-sectional | Convenience      | RPR+TPPA          | 9.2%                   | 466                   | 3830                | 12.2%                        | 12         |
| Qin, 2016 <sup>86</sup>       | China     | 2013          | Upper-middle | Cross-sectional | Snowball         | RPR+ELISA         | 7.3%                   | 2689                  | 42680               | 6.3%                         | 12         |
| Chen, 2017 <sup>98</sup>      | China     | 2013          | Upper-middle | Cross-sectional | Snowball         | TRUST+ELISA       | 8.6%                   | 231                   | 4208                | 5.5%                         | 13         |
| Guanghua, 2018 <sup>127</sup> | China     | 2013          | Upper-middle | Cross-sectional | Convenience      | RPR+ELISA         | 6.6%                   | 185                   | 1996                | 9.3%                         | 14         |
| Hu, 2016 <sup>114</sup>       | China     | 2013          | Upper-middle | Cross-sectional | Convenience      | TRUST+ELISA       | 8.8%                   | 169                   | 2591                | 6.5%                         | 12         |
| Hu, 2017 <sup>99</sup>        | China     | 2013          | Upper-middle | Cross-sectional | Snowball         | RPR+ELISA         | 3.6%                   | 193                   | 3164                | 6.1%                         | 12         |
| Zeng, 2014 <sup>58</sup>      | China     | 2013          | Upper-middle | Cross-sectional | Snowball         | TRUST+ELISA       | 19.7%                  | 11                    | 376                 | 2.9%                         | 12         |
| Zhang, 2019 <sup>128</sup>    | China     | 2013          | Upper-middle | Cross-sectional | Snowball         | RPR+TRUST+ELISA   | 23.0%                  | 28                    | 875                 | 3.2%                         | 13         |
| Zhong, 2014 <sup>75</sup>     | China     | 2013          | Upper-middle | Cross-sectional | Snowball         | RPR+TPPA          | 11.4%                  | 21                    | 633                 | 3.3%                         | 14         |
| Wu, 2019 <sup>129</sup>       | China     | 2013          | Upper-middle | Case-control    | Convenience      | TRUST+TPPA        | .                      | 71                    | 447                 | 15.9%                        | 13         |
| Ding, 2014 <sup>130</sup>     | China     | 2013          | Upper-middle | Cross-sectional | Snowball         | Syphilis antibody | 1.3%                   | 2                     | 151                 | 1.3%                         | 10         |
| Zhang, 2018 <sup>131</sup>    | China     | 2012-2014     | Upper-middle | Cross-sectional | Convenience      | RPR+TPPA          | 10.8%                  | 71                    | 646                 | 11.0%                        | 13         |
| Cai, 2016 <sup>132</sup>      | China     | 2011-2015     | Upper-middle | Cross-sectional | VCT              | TRUST+TPPA        | 9.8%                   | 556                   | 3040                | 18.3%                        | 11         |
| Wu, 2018 <sup>119</sup>       | China     | 2013          | Upper-middle | Cross-sectional | Snowball         | RPR+ELISA         | 5.5%                   | 22                    | 400                 | 5.5%                         | 11         |
| Liu, 2016 <sup>133</sup>      | China     | 2013-2014     | Upper-middle | Cross-sectional | Convenience      | TRUST+TPPA        | 12.7%                  | 269                   | 3588                | 7.5%                         | 12         |
| Li, 2016 <sup>134</sup>       | China     | 2013-2014     | Upper-middle | Cross-sectional | RDS              | TRUST+TPPA        | 14.7%                  | 201                   | 1316                | 15.3%                        | 13         |
| Liu, 2016 <sup>135</sup>      | China     | 2013-2014     | Upper-middle | Cross-sectional | Snowball         | ELISA             | 12.4%                  | 56                    | 587                 | 9.5%                         | 13         |
| Chen, 2017 <sup>98</sup>      | China     | 2014          | Upper-middle | Cross-sectional | Snowball         | TRUST+ELISA       | 8.9%                   | 324                   | 4766                | 6.8%                         | 13         |
| Guanghua, 2018 <sup>127</sup> | China     | 2014          | Upper-middle | Cross-sectional | Convenience      | RPR+ELISA         | 8.4%                   | 193                   | 1965                | 9.8%                         | 14         |
| Hu, 2016 <sup>114</sup>       | China     | 2014          | Upper-middle | Cross-sectional | Convenience      | TRUST+ELISA       | 10.6%                  | 204                   | 2610                | 7.8%                         | 12         |
| Hu, 2017 <sup>99</sup>        | China     | 2014          | Upper-middle | Cross-sectional | Snowball         | RPR+ELISA         | 4.4%                   | 138                   | 3060                | 4.5%                         | 12         |
| Zhang, 2019 <sup>128</sup>    | China     | 2014          | Upper-middle | Cross-sectional | Snowball         | RPR+TRUST+ELISA   | 21.5%                  | 66                    | 1149                | 5.7%                         | 13         |
| Huang, 2016 <sup>136</sup>    | China     | 2014          | Upper-middle | Cross-sectional | TLS              | RPR+TPPA          | 9.7%                   | 105                   | 965                 | 10.9%                        | 14         |
| Wu, 2018 <sup>119</sup>       | China     | 2014          | Upper-middle | Cross-sectional | Snowball         | RPR+ELISA         | 6.0%                   | 26                    | 400                 | 6.5%                         | 11         |
| Li, 2019 <sup>137</sup>       | China     | 2014-2015     | Upper-middle | Cohort          | Convenience      | RPR+TPPA          | 0.0%                   | 34                    | 523                 | 6.5%                         | 14         |
| Zhang, 2017 <sup>138</sup>    | China     | 2014-2015     | Upper-middle | Cross-sectional | Convenience      | TRUST+TPPA        | 17.0%                  | 34                    | 300                 | 11.3%                        | 14         |
| Lu, 2017 <sup>139</sup>       | China     | 2015          | Upper-middle | Cross-sectional | Snowball         | TRUST+ELISA       | 9.8%                   | 10                    | 102                 | 9.8%                         | 11         |
| Guanghua, 2018 <sup>127</sup> | China     | 2015          | Upper-middle | Cross-sectional | Convenience      | RPR+ELISA         | 11.2%                  | 104                   | 1697                | 6.1%                         | 14         |
| Hu, 2016 <sup>114</sup>       | China     | 2015          | Upper-middle | Cross-sectional | Convenience      | TRUST+ELISA       | 10.1%                  | 212                   | 2541                | 8.3%                         | 12         |
| Zhang, 2019 <sup>128</sup>    | China     | 2015          | Upper-middle | Cross-sectional | Snowball         | RPR+TRUST+ELISA   | 20.3%                  | 71                    | 1329                | 5.3%                         | 13         |
| Liu, 2017 <sup>140</sup>      | China     | 2015          | Upper-middle | Cross-sectional | VCT              | RPR+TPPA          | 11.6%                  | 53                    | 732                 | 7.2%                         | 13         |
| An, 2019 <sup>141</sup>       | China     | 2015          | Upper-middle | Cross-sectional | Convenience      | RPR+TPPA          | 22.5%                  | 33                    | 267                 | 12.4%                        | 15         |
| Wu, 2018 <sup>119</sup>       | China     | 2015          | Upper-middle | Cross-sectional | Snowball         | RPR+ELISA         | 8.3%                   | 20                    | 400                 | 5.0%                         | 11         |
| Zhang, 2019 <sup>128</sup>    | China     | 2016          | Upper-middle | Cross-sectional | Snowball         | RPR+TRUST+ELISA   | 19.8%                  | 107                   | 1604                | 6.7%                         | 13         |
| Wei, 2019 <sup>142</sup>      | China     | 2015-2017     | Upper-middle | Cross-sectional | TLS              | RPR+TPPA          | 13.5%                  | 484                   | 3613                | 13.4%                        | 11         |
| Bai, 2019 <sup>143</sup>      | China     | 2016          | Upper-middle | Cross-sectional | Convenience      | TRUST+ELISA       | 3.8%                   | 32                    | 400                 | 8.0%                         | 11         |
| Wu, 2018 <sup>119</sup>       | China     | 2016          | Upper-middle | Cross-sectional | Snowball         | RPR+ELISA         | 9.0%                   | 34                    | 400                 | 8.5%                         | 11         |
| Zhang, 2019 <sup>128</sup>    | China     | 2017          | Upper-middle | Cross-sectional | Snowball         | RPR+TRUST+ELISA   | 18.9%                  | 102                   | 1527                | 6.7%                         | 13         |
| Bai, 2019 <sup>143</sup>      | China     | 2017          | Upper-middle | Cross-sectional | Convenience      | TRUST+ELISA       | 3.3%                   | 17                    | 400                 | 4.3%                         | 11         |
| Wu, 2018 <sup>119</sup>       | China     | 2017          | Upper-middle | Cross-sectional | Snowball         | RPR+ELISA         | 6.3%                   | 43                    | 400                 | 10.8%                        | 11         |
| Liao, 2019 <sup>144</sup>     | China     | 2018          | Upper-middle | Cross-sectional | Snowball         | TRUST+ELISA       | 3.0%                   | 96                    | 3474                | 2.8%                         | 12         |
| Bai, 2019 <sup>143</sup>      | China     | 2018          | Upper-middle | Cross-sectional | Convenience      | TRUST+ELISA       | 3.0%                   | 31                    | 400                 | 7.8%                         | 11         |
| Pisani, 2004 <sup>145</sup>   | Indonesia | 2002          | Low          | Cross-sectional | Convenience      | RPR+TPPA          | 9.0%                   | 131                   | 767                 | 17.1%                        | 14         |



| Study                               | Country             | Study year(s) | Income level | Study design    | Sampling method* | Diagnostic method             | HIV prevalence (crude) | No. syphilis positive | No. syphilis tested | Syphilis prevalence (crude)† | Axis score |
|-------------------------------------|---------------------|---------------|--------------|-----------------|------------------|-------------------------------|------------------------|-----------------------|---------------------|------------------------------|------------|
| MOH, 2013 <sup>146</sup>            | Indonesia           | 2013          | Lower-middle | Cross-sectional | RDS              | RPR+TPHA                      | 17.3%                  | 122                   | 960                 | 12.7%                        | 11         |
| MOH, 2013 <sup>146</sup>            | Indonesia           | 2013          | Lower-middle | Cross-sectional | Probability      | RPR+TPHA                      | 19.0%                  | 159                   | 980                 | 16.2%                        | 11         |
| Itoda, 2013 <sup>147</sup>          | Japan               | 2008-2011     | High         | Cross-sectional | VCT              | POCT                          | 3.1%                   | 43                    | 423                 | 10.2%                        | 13         |
| Wickersham, 2017 <sup>148</sup>     | Malaysia            | 2014          | Upper-middle | Cross-sectional | RDS              | RPR+TPPA                      | 12.4%                  | 53                    | 187                 | 28.3%                        | 15         |
| Davaalkham, 2009 <sup>149</sup>     | Mongolia            | 2007          | Lower-middle | Cross-sectional | Convenience      | POCT                          | 0.0%                   | 15                    | 50                  | 30.0%                        | 11         |
| MOH, 2012 <sup>150</sup>            | Mongolia            | 2012          | Lower-middle | Cross-sectional | RDS              | RPR≥1:2+TPPA                  | 10.7%                  | 8                     | 196                 | 4.1%                         | 14         |
| MOH, 2014 <sup>151</sup>            | Mongolia            | 2014          | Upper-middle | Cross-sectional | RDS              | RPR+TPHA                      | 13.7%                  | 18                    | 255                 | 7.1%                         | 14         |
| MOH, 2007 <sup>152</sup>            | Myanmar             | 2007          | Low          | Cross-sectional | Convenience      | VDRL                          | 29.3%                  | 28                    | 400                 | 7.0%                         | 11         |
| MOH, 2009 <sup>153</sup>            | Myanmar             | 2008          | Low          | Cross-sectional | Convenience      | VDRL                          | 28.8%                  | 56                    | 397                 | 14.1%                        | 12         |
| MOH, 2010 <sup>154</sup>            | Myanmar             | 2009          | Low          | Cross-sectional | Convenience      | VDRL                          | 22.3%                  | 25                    | 400                 | 6.3%                         | 12         |
| MOH, 2011 <sup>155</sup>            | Myanmar             | 2010          | Low          | Cross-sectional | Convenience      | VDRL                          | 11.0%                  | 4                     | 400                 | 1.0%                         | 12         |
| MOH, 2012 <sup>156</sup>            | Myanmar             | 2011          | Low          | Cross-sectional | Convenience      | VDRL                          | 7.8%                   | 10                    | 400                 | 2.5%                         | 11         |
| MOH, 2013 <sup>157</sup>            | Myanmar             | 2012          | Low          | Cross-sectional | Convenience      | VDRL                          | 8.9%                   | 25                    | 763                 | 3.3%                         | 11         |
| Dept of Health, 2014 <sup>158</sup> | Philippines         | 2013          | Lower-middle | Cross-sectional | Probability      | TPPA                          | 3.7%                   | 7                     | 296                 | 2.4%                         | 12         |
| Jung, 2012 <sup>159</sup>           | South Korea         | 2008          | High         | Cross-sectional | TLS              | TPPA                          | 6.5%                   | 22                    | 108                 | 20.4%                        | 13         |
| Ananwanich, 2013 <sup>160</sup>     | Thailand            | 2005          | Lower-middle | Cross-sectional | VCT              | RPR+POCT                      | 24.6%                  | 10                    | 200                 | 5.0%                         | 10         |
| Ananwanich, 2013 <sup>160</sup>     | Thailand            | 2006          | Lower-middle | Cross-sectional | VCT              | RPR+POCT                      | 23.0%                  | 16                    | 505                 | 3.2%                         | 10         |
| Ananwanich, 2013 <sup>160</sup>     | Thailand            | 2007          | Lower-middle | Cross-sectional | VCT              | RPR+POCT                      | 25.3%                  | 27                    | 440                 | 6.1%                         | 10         |
| Holtz, 2012 <sup>161</sup>          | Thailand            | 2006-2010     | Lower-middle | Cross-sectional | Convenience      | RPR≥1:8+POCT                  | 21.6%                  | 68                    | 1541                | 4.4%                         | 14         |
| Ananwanich, 2013 <sup>160</sup>     | Thailand            | 2008          | Lower-middle | Cross-sectional | VCT              | RPR+POCT                      | 26.6%                  | 27                    | 611                 | 4.4%                         | 10         |
| Ananwanich, 2013 <sup>160</sup>     | Thailand            | 2009          | Lower-middle | Cross-sectional | VCT              | RPR+POCT                      | 27.4%                  | 63                    | 707                 | 8.9%                         | 10         |
| Van Griensven, 2013 <sup>162</sup>  | Thailand            | 2006-2012     | Lower-middle | Cohort          | Convenience      | RPR≥1:8+POCT                  | 21.3%                  | 82                    | 1744                | 4.7%                         | 12         |
| Ananwanich, 2013 <sup>160</sup>     | Thailand            | 2010          | Upper-middle | Cross-sectional | VCT              | RPR+POCT                      | 34.1%                  | 157                   | 867                 | 18.1%                        | 10         |
| Ananwanich, 2013 <sup>160</sup>     | Thailand            | 2011          | Upper-middle | Cross-sectional | VCT              | RPR+POCT                      | 29.4%                  | 124                   | 994                 | 12.5%                        | 10         |
| Phanuphak, 2018 <sup>163</sup>      | Thailand            | 2016-2017     | Upper-middle | Cross-sectional | Convenience      | RPR+TPHA                      | 0.0%                   | 113                   | 1626                | 6.9%                         | 13         |
| Pisani, 2006 <sup>164</sup>         | Timor -Leste        | 2003          | Low          | Cross-sectional | Convenience      | RPR+TPHA                      | 0.9%                   | 17                    | 110                 | 15.5%                        | 10         |
| ASHM, 2017 <sup>165</sup>           | Timor-Leste         | 2017          | Lower-middle | Cross-sectional | RDS              | POCT                          | 0.3%                   | 21                    | 310                 | 6.8%                         | 15         |
| Pham, 2012 <sup>166</sup>           | Vietnam             | 2009          | Lower-middle | Cross-sectional | Convenience      | TPHA                          | 6.3%                   | 5                     | 381                 | 1.3%                         | 12         |
| MOH, 2011 <sup>167</sup>            | Vietnam             | 2009-2010     | Lower-middle | Cross-sectional | RDS              | RPR+TPHA                      | 13.7%                  | 17                    | 1595                | 1.1%                         | 15         |
| Nguyen, 2016 <sup>168</sup>         | Vietnam             | 2010-2012     | Lower-middle | Cross-sectional | Convenience      | RPR+TPHA                      | 2.6%                   | 40                    | 2467                | 1.6%                         | 14         |
| Colby, 2016 <sup>169</sup>          | Vietnam             | 2015          | Lower-middle | Cross-sectional | Snowball         | RPR+POCT                      | 18.0%                  | 36                    | 205                 | 17.6%                        | 12         |
| <b>Europe and Northern America</b>  |                     |               |              |                 |                  |                               |                        |                       |                     |                              |            |
| Revniers, 2018 <sup>170</sup>       | Belgium             | 2015-2016     | High         | Cross-sectional | Convenience      | RPR≥1:4 +TPPA/TPA             | 0.0%                   | 15                    | 200                 | 7.5%                         | 15         |
| Ravlija, 2011 <sup>171</sup>        | Bosnia- Herzegovina | 2010-2011     | Upper-middle | Cross-sectional | Snowball         | ELISA                         | 1.8%                   | 1                     | 168                 | 0.6%                         | 12         |
| Ravlija, 2012 <sup>172</sup>        | Bosnia- Herzegovina | 2012          | Upper-middle | Cross-sectional | Snowball         | ELISA                         | 1.2%                   | 2                     | 330                 | 0.6%                         | 12         |
| Nelson, 2019 <sup>173</sup>         | Canada              | 2011-2013     | High         | Cross-sectional | Convenience      | EIA                           | 38.4%                  | 15                    | 86                  | 17.4%                        | 12         |
| Bozicevic, 2009 <sup>174</sup>      | Croatia             | 2006          | Upper-middle | Cross-sectional | RDS              | TPHA                          | 5.0%                   | 31                    | 360                 | 8.6%                         | 15         |
| Bozicevic, 2012 <sup>175</sup>      | Croatia             | 2010-2011     | High         | Cross-sectional | RDS              | RPR+TPHA                      | 3.6%                   | 3                     | 387                 | 0.8%                         | 15         |
| Vilibic-Cavlek, 2018 <sup>176</sup> | Croatia             | 2011-2013     | High         | Cross-sectional | VCT              | ELISA+Western Blotting        | 3.3%                   | 11                    | 90                  | 12.2%                        | 12         |
| Ruutel, 2015 <sup>177</sup>         | Estonia             | 2013          | High         | Cross-sectional | Convenience      | Syphilis antibody             | 7.0%                   | 2                     | 43                  | 4.7%                         | 15         |
| Zorzi, 2017 <sup>178</sup>          | Italy               | 2013-2014     | High         | Cross-sectional | RDS              | RPR+TPPA                      | .                      | 16                    | 289                 | 5.5%                         | 14         |
| Mikik, 2011 <sup>179</sup>          | Macedonia           | 2010          | Upper-middle | Cross-sectional | RDS              | Real time PCR (blood)         | 0.5%                   | 2                     | 382                 | 0.5%                         | 12         |
| MOH, 2014 <sup>180</sup>            | Macedonia           | 2013-2014     | Upper-middle | Cross-sectional | RDS              | Syphilis antibody+TPH-test    | 2.3%                   | 5                     | 426                 | 1.2%                         | 13         |
| WHO (Europe), 2004 <sup>181</sup>   | Moldova             | 2003          | Low          | Cross-sectional | Convenience      | Treponema antibody            | 1.7%                   | 12                    | 99                  | 12.1%                        | 11         |
| NCHM, 2008 <sup>182</sup>           | Moldova             | 2007          | Lower-middle | Cross-sectional | Convenience      | TPHA                          | 4.8%                   | 2                     | 31                  | 6.5%                         | 14         |
| Zohrabyan, 2013 <sup>183</sup>      | Moldova             | 2010          | Lower-middle | Cross-sectional | RDS              | TPHA                          | 1.5%                   | 27                    | 397                 | 6.8%                         | 13         |
| Hoorneborg, 2018 <sup>184</sup>     | Netherland          | 2015-2016     | High         | Cross-sectional | Convenience      | CLIA                          | 0.0%                   | 6                     | 374                 | 1.6%                         | 13         |
| Amirkhanian, 2006 <sup>185</sup>    | Russia              | 2003          | Lower-middle | Cross-sectional | Convenience      | Wasserman reaction assay+TPHA | .                      | 13                    | 125                 | 10.4%                        | 10         |
| WHO (Europe), 2004 <sup>181</sup>   | Russia              | 2003          | Lower-middle | Cross-sectional | Snowball         | Treponema antibody            | 2.5%                   | 21                    | 253                 | 8.3%                         | 11         |

| Study                                  | Country            | Study year(s) | Income level | Study design    | Sampling method* | Diagnostic method     | HIV prevalence (crude) | No. syphilis positive | No. syphilis tested | Syphilis prevalence (crude)† | Axis score |
|----------------------------------------|--------------------|---------------|--------------|-----------------|------------------|-----------------------|------------------------|-----------------------|---------------------|------------------------------|------------|
| Baral, 2010 <sup>186</sup>             | Russia             | 2005-2006     | Upper-middle | Cohort          | RDS              | RPR                   | 16.0%                  | 6                     | 50                  | 12.0%                        | 11         |
| WHO (Europe), 2007 <sup>187</sup>      | Russia             | 2006          | Upper-middle | Cross-sectional | Convenience      | RPGA                  | 2.2%                   | 10                    | 558                 | 1.8%                         | 15         |
| Wirtz, 2015 <sup>188</sup>             | Russia             | 2012-2013     | High         | Cross-sectional | RDS              | RPR+RPGA              | 47.2%                  | 20                    | 123                 | 16.3%                        | 14         |
| MOH, 2012 <sup>189</sup>               | Serbia             | 2012          | Upper-middle | Cross-sectional | Snowball         | POCT                  | 3.8%                   | 46                    | 400                 | 11.5%                        | 13         |
| Tahirukaj, 2014 <sup>190</sup>         | Serbia (Kosovo)    | 2014          | Lower-middle | Cross-sectional | RDS              | Syphilis antibody     | 2.3%                   | 9                     | 217                 | 4.1%                         | 15         |
| Hurtado, 2011 <sup>191</sup>           | Spain              | 2000-2006     | High         | Cross-sectional | VCT              | RPR+ELISA+FTA-ABS     | .                      | 33                    | 1387                | 2.4%                         | 9          |
| Hurtado, 2010 <sup>192</sup>           | Spain              | 2008          | High         | Cross-sectional | Convenience      | POCT                  | 4.1%                   | 6                     | 141                 | 4.3%                         | 11         |
| Borelli, 2009 <sup>193</sup>           | Switzerland        | 2004          | High         | Cross-sectional | Convenience      | TPPA                  | .                      | 40                    | 610                 | 6.6%                         | 10         |
| Manavi, 2012 <sup>194</sup>            | United Kingdom     | 2009-2010     | High         | Cross-sectional | Convenience      | POCT                  | 1.5%                   | 1                     | 390                 | 0.3%                         | 8          |
| Golden, 2006 <sup>195</sup>            | United States      | 2002-2005     | High         | Cross-sectional | Convenience      | RPR+TPPA              | 5.0%                   | 1                     | 445                 | 0.2%                         | 12         |
| Mayer, 2012 <sup>196</sup>             | United States      | 2004-2010     | High         | Cross-sectional | Convenience      | RPR+FTA-ABS           | 2.3%                   | 17                    | 850                 | 2.0%                         | 12         |
| Katz, 2018 <sup>197</sup>              | United States      | 2010-2014     | High         | RCT             | Convenience      | RPR+TPPA              | 0.0%                   | 4                     | 230                 | 1.7%                         | 15         |
| Watson, 2019 <sup>198</sup>            | United States      | 2013-2014     | High         | Cross-sectional | RDS              | Treponema antibody    | 36.8%                  | 143                   | 442                 | 32.4%                        | 13         |
| Fujimoto, 2018 <sup>199</sup>          | United States      | 2014-2016     | High         | Cross-sectional | RDS              | RPR≥1:4+FTA-ABS       | 40.5%                  | 105                   | 365                 | 28.8%                        | 12         |
| Reback, 2018 <sup>200</sup>            | United States      | 2014-2016     | High         | Cohort          | Convenience      | RPR+FTA-ABS           | 41.6%                  | 38                    | 286                 | 13.3%                        | 12         |
| Obafemi, 2019 <sup>201</sup>           | United States      | 2016-2018     | High         | Cross-sectional | Convenience      | RPR+TPPA              | 1.8%                   | 38                    | 2296                | 1.7%                         | 11         |
| Shannon, 2019 <sup>202</sup>           | United States      | 2017-2019     | High         | Cross-sectional | Convenience      | POCT                  | 17.0%                  | 62                    | 788                 | 7.9%                         | 15         |
| <b>Latin America and the Caribbean</b> |                    |               |              |                 |                  |                       |                        |                       |                     |                              |            |
| Pando, 2006 <sup>203</sup>             | Argentina          | 2000-2001     | Upper-middle | Cross-sectional | Convenience      | VDRL+TPHA+FTA-ABS     | 13.8%                  | 112                   | 662                 | 16.9%                        | 14         |
| Berini, 2007 <sup>204</sup>            | Argentina          | 2000-2003     | Upper-middle | Cross-sectional | Convenience      | VDRL+TPHA+FTA-ABS     | 13.2%                  | 109                   | 682                 | 16.0%                        | 12         |
| Segura, 2010 <sup>205</sup>            | Argentina          | 2003-2004     | Upper-middle | Cohort          | Convenience      | RPR+TPPA/TPHA+FTA-ABS | 7.5%                   | 60                    | 877                 | 6.8%                         | 9          |
| Avila, 2017 <sup>206</sup>             | Argentina          | 2006-2009     | Upper-middle | Cross-sectional | Convenience      | VDRL+TPHA+FTA-ABS     | 34.1%                  | 130                   | 258                 | 50.4%                        | 14         |
| Pando, 2012 <sup>207</sup>             | Argentina          | 2007-2009     | Upper-middle | Cross-sectional | RDS              | VDRL+TPHA+FTA-ABS     | 17.2%                  | 102                   | 496                 | 20.6%                        | 13         |
| MOH, 2012 <sup>208</sup>               | Belize             | 2012          | Upper-middle | Cross-sectional | RDS              | RPR+TPPA              | 13.8%                  | 1                     | 129                 | 0.8%                         | 11         |
| MOH, 2010 <sup>209</sup>               | Bolivia            | 2008          | Lower-middle | Cross-sectional | RDS              | RPR+TPPA              | 13.6%                  | 72                    | 811                 | 8.9%                         | 15         |
| Soares, 2014 <sup>210</sup>            | Brazil             | 2005-2006     | Lower-middle | Cross-sectional | RDS              | POCT                  | 7.3%                   | 62                    | 558                 | 11.1%                        | 11         |
| Ribeiro, 2012 <sup>211</sup>           | Brazil             | 2007          | Upper-middle | Cross-sectional | Convenience      | ELISA                 | .                      | 21                    | 833                 | 2.5%                         | 13         |
| Brignol, 2015 <sup>212</sup>           | Brazil             | 2008-2009     | Upper-middle | Cross-sectional | RDS              | POCT                  | 6.3%                   | 32                    | 363                 | 8.8%                         | 13         |
| de Albuquerque, 2014 <sup>213</sup>    | Brazil             | 2011          | Upper-middle | Cross-sectional | Convenience      | VDRL+MHA-TP           | 4.8%                   | 10                    | 62                  | 16.1%                        | 10         |
| Fernandes, 2015 <sup>214</sup>         | Brazil             | 2011-2013     | Upper-middle | Cross-sectional | Convenience      | VDRL+EIA              | 14.4%                  | 149                   | 430                 | 34.7%                        | 12         |
| Hoagland, 2017 <sup>215</sup>          | Brazil             | 2014-2015     | Upper-middle | Cross-sectional | Convenience      | RPR≥1:8+MHA-TP        | 0.0%                   | 43                    | 444                 | 9.7%                         | 15         |
| Grinsztejn, 2017 <sup>216</sup>        | Brazil             | 2015-2016     | Upper-middle | Cross-sectional | RDS              | VDRL≥1:8+TPHA         | 41.2%                  | 112                   | 342                 | 32.7%                        | 14         |
| Da Motta, 2018 <sup>217</sup>          | Brazil             | 2016          | Upper-middle | Cross-sectional | Probability      | VDRL+FTA-ABS          | .                      | 59                    | 1279                | 4.6%                         | 16         |
| Ferreira, 2019 <sup>218</sup>          | Brazil             | 2015-2017     | Upper-middle | Cohort          | RDS              | VDRL≥1:8+POCT         | 54.0%                  | 88                    | 322                 | 27.3%                        | 11         |
| MOH, 2010 <sup>219</sup>               | Costa Rica         | 2009          | Upper-middle | Cross-sectional | RDS              | VDRL+TPHA             | 12.7%                  | 54                    | 300                 | 18.0%                        | 14         |
| Brito, 2015 <sup>220</sup>             | Dominican Republic | 2013          | Upper-middle | Cross-sectional | Snowball         | VDRL+FTA-ABS          | 5.0%                   | 13                    | 100                 | 13.0%                        | 12         |
| Hernandez, 2017 <sup>221</sup>         | Ecuador            | 2010          | Upper-middle | Cross-sectional | Convenience      | VDRL+TPPA             | 9.5%                   | 33                    | 306                 | 10.8%                        | 15         |
| Jacobson, 2014 <sup>222</sup>          | Ecuador            | 2010-2011     | Upper-middle | Cross-sectional | RDS              | RPR≥1:8+FTA-ABS       | 12.8%                  | 24                    | 414                 | 5.8%                         | 14         |
| Sanchez-Gomez, 2015 <sup>223</sup>     | Ecuador            | 2011-2012     | Upper-middle | Cross-sectional | RDS              | RPR≥1:8+FTA-ABS       | 13.6%                  | 25                    | 370                 | 6.8%                         | 14         |
| Ham, 2015 <sup>224</sup>               | El Salvador        | 2007-2008     | Lower-middle | Cross-sectional | RDS              | RPR+TPPA              | 13.5%                  | 70                    | 704                 | 9.9%                         | 8          |
| Creswell, 2012 <sup>225</sup>          | El Salvador        | 2008          | Lower-middle | Cross-sectional | RDS              | RPR+TPHA              | 13.4%                  | 94                    | 690                 | 13.6%                        | 14         |
| Lahuerta, 2011 <sup>226</sup>          | Guatemala          | 2006-2009     | Lower-middle | Cross-sectional | VCT              | VDRL+TPHA             | 0.8%                   | 0                     | 385                 | 0.0%                         | 12         |
| Ham, 2015 <sup>224</sup>               | Guatemala          | 2012          | Lower-middle | Cross-sectional | RDS              | RPR≥1:8+TPPA          | 10.4%                  | 11                    | 541                 | 2.0%                         | 8          |
| MOH, 2014 <sup>227</sup>               | Guyana             | 2014          | Lower-middle | Cross-sectional | Convenience      | RPR                   | .                      | 4                     | 387                 | 1.0%                         | 15         |
| OHMASS, 2015 <sup>228</sup>            | Haiti              | 2014-2015     | Low          | Cross-sectional | RDS              | RPR+POCT              | 16.0%                  | 175                   | 1239                | 14.1%                        | 16         |
| Zalla, 2019 <sup>229</sup>             | Haiti              | 2016-2017     | Low          | Cross-sectional | Probability      | POCT                  | 4.7%                   | 49                    | 488                 | 10.0%                        | 17         |
| Ham, 2015 <sup>224</sup>               | Honduras           | 2012          | Lower-middle | Cross-sectional | RDS              | RPR+TPPA              | 14.4%                  | 54                    | 677                 | 8.0%                         | 8          |
| Figueroa, 2013 <sup>230</sup>          | Jamaica            | 2007-2008     | Upper-middle | Cross-sectional | Convenience      | TRUST+TPPA            | 32.3%                  | 12                    | 201                 | 6.0%                         | 11         |
| Logie, 2018 <sup>231</sup>             | Jamaica            | 2015          | Upper-middle | Cross-sectional | Snowball         | POCT                  | .                      | 8                     | 83                  | 9.6%                         | 13         |



| Study                                                | Country          | Study year(s) | Income level | Study design    | Sampling method* | Diagnostic method          | HIV prevalence (crude) | No. syphilis positive | No. syphilis tested | Syphilis prevalence (crude)† | Axis score |
|------------------------------------------------------|------------------|---------------|--------------|-----------------|------------------|----------------------------|------------------------|-----------------------|---------------------|------------------------------|------------|
| Pitpitan, 2015 <sup>232</sup>                        | Mexico           | 2012-2013     | Upper-middle | Cross-sectional | RDS              | RPR+TPHA                   | 17.3%                  | 14                    | 191                 | 7.3%                         | 15         |
| Martinez, 2019 <sup>233</sup>                        | Mexico           | 2016-2018     | Upper-middle | Cross-sectional | VCT              | POCT                       | 16.7%                  | 198                   | 1398                | 14.2%                        | 5          |
| Ham, 2015 <sup>234</sup>                             | Nicaragua        | 2009-2010     | Lower-middle | Cross-sectional | RDS              | RPR+TPPA                   | 7.8%                   | 54                    | 652                 | 8.3%                         | 8          |
| Hakre, 2014 <sup>234</sup>                           | Panama           | 2011-2012     | Upper-middle | Cross-sectional | RDS              | RPR+TPHA                   | 20.6%                  | 141                   | 603                 | 23.4%                        | 14         |
| Sanchez, 2007 <sup>235</sup>                         | Peru             | 2000          | Lower-middle | Cross-sectional | Snowball         | RPR+MHA-TP                 | 19.7%                  | 201                   | 1357                | 14.8%                        | 14         |
| Clark, 2007 <sup>236</sup>                           | Peru             | 2000-2001     | Lower-middle | Cross-sectional | Probability      | RPR+TPPA                   | 0.0%                   | 2                     | 85                  | 2.4%                         | 15         |
| Caceres, 2008 <sup>237</sup>                         | Peru             | 2001-2003     | Lower-middle | Cross-sectional | Convenience      | RPR+TPPA                   | 9.6%                   | 48                    | 166                 | 28.9%                        | 12         |
| Lama, 2006 <sup>238</sup>                            | Peru             | 2002-2003     | Lower-middle | Cross-sectional | Snowball         | RPR+MHA-TP                 | 13.9%                  | 440                   | 3280                | 13.4%                        | 13         |
| Clark, 2008 <sup>239</sup>                           | Peru             | 2003-2004     | Lower-middle | Cross-sectional | Convenience      | RPR+TPPA                   | 1.5%                   | 5                     | 197                 | 2.5%                         | 14         |
| Park, 2016 <sup>240</sup>                            | Peru             | 2002-2005     | Lower-middle | Cohort          | Convenience      | TPPA                       | .                      | 124                   | 913                 | 13.6%                        | 12         |
| Snowden, 2010 <sup>241</sup>                         | Peru             | 2003-2005     | Lower-middle | Cross-sectional | Convenience      | RPR≥1:8+TPPA               | 11.9%                  | 54                    | 513                 | 10.5%                        | 12         |
| Blas, 2007 <sup>242</sup>                            | Peru             | 2006          | Lower-middle | Cross-sectional | Convenience      | RPR                        | 5.5%                   | 6                     | 78                  | 7.7%                         | 11         |
| Perez-Brumer, 2013 <sup>243</sup>                    | Peru             | 2007          | Lower-middle | Cross-sectional | Convenience      | RPR≥1:16+TPPA              | 8.2%                   | 8                     | 122                 | 6.6%                         | 12         |
| Silva-Santisteban, 2012 <sup>244</sup>               | Peru             | 2009          | Upper-middle | Cross-sectional | RDS              | RPR≥1:8                    | 29.8%                  | 23                    | 426                 | 5.4%                         | 14         |
| Pizzicato, 2017 <sup>245</sup>                       | Peru             | 2011          | Upper-middle | Cross-sectional | Convenience      | RPR+MHA-TP                 | 8.0%                   | 706                   | 5101                | 13.8%                        | 13         |
| Galea, 2015 <sup>246</sup>                           | Peru             | 2012-2013     | Upper-middle | Cross-sectional | Convenience      | POCT                       | 0.0%                   | 105                   | 600                 | 17.5%                        | 12         |
| Blair, 2019 <sup>247</sup>                           | Peru             | 2012-2014     | Upper-middle | Cross-sectional | Convenience      | RPR≥1:16+MHA-TP            | .                      | 143                   | 898                 | 15.9%                        | 13         |
| Allan-Blitz, 2019 <sup>248</sup>                     | Peru             | 2016          | Upper-middle | Cross-sectional | Convenience      | RPR+TPPA                   | 22.8%                  | 84                    | 303                 | 27.7%                        | 11         |
| <b>Northern Africa and Western Asia</b>              |                  |               |              |                 |                  |                            |                        |                       |                     |                              |            |
| MOH, 2011 <sup>249</sup>                             | Armenia          | 2010-2011     | Lower-middle | Cross-sectional | RDS              | RPR+TPHA                   | 2.2%                   | 4                     | 270                 | 1.5%                         | 10         |
| MOH, 2013 <sup>250</sup>                             | Armenia          | 2012          | Lower-middle | Cross-sectional | RDS              | RPR+TPHA                   | 2.0%                   | 7                     | 300                 | 2.3%                         | 11         |
| MOH, 2015 <sup>251</sup>                             | Armenia          | 2014          | Lower-middle | Cross-sectional | RDS              | RPR+TPHA                   | 1.3%                   | 6                     | 300                 | 2.0%                         | 11         |
| MOH, 2016 <sup>252</sup>                             | Armenia          | 2016          | Lower-middle | Cross-sectional | RDS              | RPR+TPHA                   | 1.3%                   | 1                     | 400                 | 0.3%                         | 14         |
| MOH, 2018 <sup>253</sup>                             | Armenia          | 2018          | Upper-middle | Cross-sectional | RDS              | Rapid test+TPHA            | 2.0%                   | 4                     | 700                 | 0.6%                         | 16         |
| MOH, 2008 <sup>254</sup>                             | Azerbaijan       | 2007-2008     | Lower-middle | Cross-sectional | Convenience      | Syphilis antibody          | 1.0%                   | 8                     | 100                 | 8.0%                         | 11         |
| MOH, 2015 <sup>255</sup>                             | Azerbaijan       | 2014-2015     | Upper-middle | Cross-sectional | RDS              | ELISA                      | 2.2%                   | 68                    | 500                 | 13.6%                        | 13         |
| Tanadgoma, 2005 <sup>256</sup>                       | Georgia          | 2005          | Lower-middle | Cross-sectional | RDS              | RPR+TPHA+ELISA             | 4.3%                   | 19                    | 70                  | 27.1%                        | 12         |
| Save the Children, 2008 <sup>257</sup>               | Georgia          | 2007          | Lower-middle | Cross-sectional | RDS              | RPR+TPHA+syphilis antibody | 3.7%                   | 44                    | 140                 | 31.4%                        | 14         |
| Curatio Intl, 2010 <sup>258</sup>                    | Georgia          | 2010          | Lower-middle | Cross-sectional | RDS              | TPHA                       | 7.0%                   | 93                    | 271                 | 34.3%                        | 15         |
| Curatio Intl, 2012 <sup>259</sup>                    | Georgia          | 2012          | Lower-middle | Cross-sectional | RDS              | TPHA                       | 13.0%                  | 71                    | 216                 | 32.9%                        | 16         |
| Curatio Intl, 2015 <sup>260</sup>                    | Georgia          | 2015          | Upper-middle | Cross-sectional | RDS              | ELISA                      | 20.7%                  | 138                   | 415                 | 33.3%                        | 14         |
| Curatio Intl, 2018 <sup>261</sup>                    | Georgia          | 2018          | Upper-middle | Cross-sectional | RDS              | RPR+TPHA+LIA               | 16.2%                  | 60                    | 621                 | 9.7%                         | 13         |
| Johnston, 2013 <sup>262</sup>                        | Morocco          | 2010-2011     | Lower-middle | Cross-sectional | RDS              | VDRL+TPHA                  | 4.9%                   | 73                    | 662                 | 11.0%                        | 11         |
| <b>Oceania (excluding Australia and New Zealand)</b> |                  |               |              |                 |                  |                            |                        |                       |                     |                              |            |
| Hakim, 2019 <sup>263</sup>                           | Papua New Guinea | 2016-2017     | Lower-middle | Cross-sectional | RDS              | POCT                       | 6.4%                   | 49                    | 860                 | 5.7%                         | 15         |
| MOH, 2018 <sup>264</sup>                             | Solomon Islands  | 2017          | Lower-middle | Cross-sectional | RDS              | RPR≥1:8                    | 0.0%                   | 0                     | 39                  | 0.0%                         | 17         |
| MOH, 2008 <sup>265</sup>                             | Tonga            | 2007-2008     | Lower-middle | Cross-sectional | Convenience      | RPR≥1:8+TPPA               | 0.0%                   | 1                     | 100                 | 1.0%                         | 13         |
| Veronese, 2015 <sup>266</sup>                        | Vanuatu          | 2011-2012     | Lower-middle | Cross-sectional | RDS              | RPR+POCT                   | 0.0%                   | 1                     | 39                  | 2.6%                         | 15         |
| <b>Sub-Saharan Africa</b>                            |                  |               |              |                 |                  |                            |                        |                       |                     |                              |            |
| Kendall, 2014 <sup>267</sup>                         | Angola           | 2011          | Upper-middle | Cross-sectional | RDS              | POCT                       | 8.2%                   | 1                     | 310                 | 0.3%                         | 14         |
| MOH, 2013 <sup>268</sup>                             | Botswana         | 2012          | Upper-middle | Cross-sectional | RDS              | RPR+TPHA                   | 13.1%                  | 12                    | 450                 | 2.7%                         | 15         |
| Goodman, 2016 <sup>269</sup>                         | Burkina Faso     | 2013          | Low          | Cross-sectional | RDS              | RPR+POCT                   | 4.8%                   | 44                    | 665                 | 6.6%                         | 13         |
| Park, 2013 <sup>270</sup>                            | Cameroon         | 2011          | Lower-middle | Cross-sectional | RDS              | RPR+TPHA                   | 37.0%                  | 2                     | 511                 | 0.4%                         | 15         |
| MoH, 2016 <sup>271</sup>                             | Cote d'Ivoire    | 2015-2016     | Lower-middle | Cross-sectional | RDS              | POCT                       | 11.6%                  | 6                     | 1288                | 0.5%                         | 17         |
| Mason, 2013 <sup>272</sup>                           | Gambia           | 2011          | Low          | Cross-sectional | Snowball         | RPR+TPHA                   | 9.8%                   | 1                     | 205                 | 0.5%                         | 13         |
| Sanders, 2013 <sup>273</sup>                         | Kenya            | 2005-2011     | Low          | Cohort          | Convenience      | RPR+TPHA                   | 0.0%                   | 7                     | 449                 | 1.6%                         | 12         |
| Muraguri, 2015 <sup>274</sup>                        | Kenya            | 2010          | Low          | Cross-sectional | RDS              | RPR+TPHA                   | 25.6%                  | 5                     | 563                 | 0.9%                         | 11         |
| MoH, 2019 <sup>275</sup>                             | Lesotho          | 2018          | Lower-middle | Cross-sectional | RDS              | POCT+EIA                   | 22.7%                  | 92                    | 825                 | 11.2%                        | 14         |
| MOH, 2013 <sup>276</sup>                             | Liberia          | 2013          | Low          | Cross-sectional | Convenience      | RPR+TPHA                   | 19.8%                  | 2                     | 207                 | 1.0%                         | 12         |

| Study                         | Country   | Study year(s) | Income level | Study design    | Sampling method* | Diagnostic method | HIV prevalence (crude) | No. syphilis positive | No. syphilis tested | Syphilis prevalence (crude)† | Axis score |
|-------------------------------|-----------|---------------|--------------|-----------------|------------------|-------------------|------------------------|-----------------------|---------------------|------------------------------|------------|
| Wirtz, 2013 <sup>277</sup>    | Malawi    | 2011-2012     | Low          | Cross-sectional | RDS              | TPHA              | 15.4%                  | 18                    | 338                 | 5.3%                         | 14         |
| Wirtz, 2017 <sup>278</sup>    | Malawi    | 2011-2014     | Low          | Cross-sectional | RDS              | TPHA              | 17.3%                  | 110                   | 2442                | 4.5%                         | 14         |
| Wirtz, 2014 <sup>279</sup>    | Malawi    | 2011-2014     | Low          | Cross-sectional | RDS              | TPHA              | 17.3%                  | 110                   | 2441                | 4.5%                         | 12         |
| MOH, 2010 <sup>280</sup>      | Mauritius | 2010          | Upper-middle | Cross-sectional | RDS              | VDRL+TPHA         | 10.6%                  | 21                    | 362                 | 5.8%                         | 15         |
| PILS, 2017¶ <sup>281</sup>    | Mauritius | 2017          | Upper-middle | Cross-sectional | RDS              | RPR/VDRL+TPHA     | 28.4%                  | 53                    | 109                 | 48.6%                        | 15         |
| Merrigan, 2011 <sup>282</sup> | Nigeria   | 2007          | Low          | Cross-sectional | RDS              | RPR+TPHA          | 12.4%                  | 0                     | 879                 | 0.0%                         | 14         |
| Wade, 2005 <sup>283</sup>     | Senegal   | 2004          | Low          | Cross-sectional | Snowball         | RPR+TPHA          | 21.5%                  | 21                    | 442                 | 4.8%                         | 13         |
| Wade, 2010 <sup>284</sup>     | Senegal   | 2007          | Low          | Cross-sectional | Snowball         | RPR+TPHA          | 21.8%                  | 17                    | 500                 | 3.4%                         | 12         |
| Johnston, 2010 <sup>285</sup> | Tanzania  | 2007          | Low          | Cross-sectional | RDS              | POCT              | 12.8%                  | 2                     | 509                 | 0.4%                         | 11         |
| Ross, 2014 <sup>286</sup>     | Tanzania  | 2012-2013     | Low          | Cross-sectional | RDS              | POCT              | 23.7%                  | 5                     | 262                 | 1.9%                         | 12         |
| Mmbaga, 2018 <sup>287</sup>   | Tanzania  | 2014          | Low          | Cross-sectional | RDS              | VDRL+TPHA         | 22.3%                  | 7                     | 646                 | 1.1%                         | 14         |
| Horacio, 2019 <sup>288</sup>  | Togo      | 2012-2013     | Low          | Cross-sectional | RDS              | VDRL+TPHA         | 9.1%                   | 7                     | 683                 | 1.0%                         | 14         |
| Ekouevi, 2019 <sup>289</sup>  | Togo      | 2017          | Low          | Cross-sectional | RDS              | POCT              | 22.0%                  | 0                     | 678                 | 0.0%                         | 13         |
| Kim, 2016 <sup>290</sup>      | Uganda    | 2008-2009     | Low          | Cross-sectional | RDS              | RPR+ELISA         | 13.4%                  | 30                    | 290                 | 10.3%                        | 11         |

\*If snowball sampling, RDS, or TLS was used with other convenience sampling methods, it was described and counted as snowball sampling, RDS, or TLS, respectively. †If a study did not have crude prevalence data of syphilis and there was no response from authors (or there was no contact information), the study was excluded from our study.

¶Data points exclusively with male sex workers, transgender women, transgender women sex workers. ‡All of the participants were male or transgender women sex workers. For male sex workers in these two studies, it is possible that heterosexual male sex workers were included to some extent.

## Text S1. Search terms

| Search on MEDLINE (full text and subject heading search terms)                                                                                                                                                                                                                                                                                                                                                                                                        |
|-----------------------------------------------------------------------------------------------------------------------------------------------------------------------------------------------------------------------------------------------------------------------------------------------------------------------------------------------------------------------------------------------------------------------------------------------------------------------|
| (syphili* OR exp syphilis [MeSH] OR treponema pallidum OR treponema pallidum [MeSH] OR great pox) AND (men who have sex with men OR exp "Sexual and Gender Minorities" [MeSH] OR gay OR homosexual* OR Homosexuality, Male [MeSH] OR bisexual* OR Bisexuality [MeSH] OR transgender OR high risk population) AND limit to yr="2000-Current" AND "each country name"                                                                                                   |
| Search on EMBASE (full text and subject heading search terms)                                                                                                                                                                                                                                                                                                                                                                                                         |
| (syphili* OR exp syphilis/ OR treponema pallidum OR Treponema pallidum/ OR great pox) AND (men who have sex with men OR men who have sex with men/ OR gay OR homosexual male/ OR homosexual* OR bisexual* OR bisexual male/ OR men who have sex with men and women/ OR transgender OR transgender/ OR high risk population OR high risk population/) AND limit to yr="2000-Current" AND "each country name"                                                           |
| Search on LILACS (full text and subject heading search terms)                                                                                                                                                                                                                                                                                                                                                                                                         |
| tw:((tw:(syphili*)) OR (mh:("syphilis"))) OR (tw:(great pox)) OR (tw:(treponema pallidum)) OR (mh:("treponema pallidum")) AND (tw:(men who have sex with men)) OR (tw:(msm)) OR (tw:(gay*)) OR (tw:(bisexual*)) OR (tw:(homosexual*)) OR (tw:(transgender*)) OR (tw:(high risk population*)) OR (tw:(same sex*)) OR (mh:("homosexuality, male")) OR (mh:("bisexual")) OR (mh:("gay")) OR (mh:("transgender"))) AND ( db:("LILACS")) AND (year_cluster:[2000 TO 2020]) |
| Search on African Index Medicus (AIM) (full text search terms)                                                                                                                                                                                                                                                                                                                                                                                                        |
| Syphili\$ OR Treponema pallidum                                                                                                                                                                                                                                                                                                                                                                                                                                       |

*Text S2. Data extraction form*

| General information                                   |                                                                             |                                   |                              |                                                |
|-------------------------------------------------------|-----------------------------------------------------------------------------|-----------------------------------|------------------------------|------------------------------------------------|
| Study ID (No.)                                        |                                                                             | Date form completed               | DD / MM / YYYY               |                                                |
| Name of person extracting data                        | 1.                                                                          | 2.                                | 3.                           |                                                |
| Study title                                           |                                                                             |                                   |                              |                                                |
| First author                                          |                                                                             | Year of publication               |                              |                                                |
| Source                                                | Database / reference                                                        | 1. MEDLINE or EMBASE              |                              |                                                |
|                                                       | Other data sets                                                             | 2. References of review studies   |                              |                                                |
| Included STIs in this article                         | 1. IBBS (for syphilis)                                                      |                                   | 2. LILACS                    | 3. AIM                                         |
|                                                       | 1. Syphilis                                                                 |                                   | 2. Gonorrhoea                | 3. Chlamydia                                   |
| 4. Trichomoniasis                                     |                                                                             |                                   |                              |                                                |
| Study eligibility                                     |                                                                             |                                   |                              |                                                |
| Country                                               |                                                                             |                                   |                              |                                                |
| SDG region                                            | 1. Sub-Saharan Africa                                                       | 2. Northern Africa & Western Asia | 3. Central & Southern Asia   | 4. Eastern & South-Eastern Asia                |
|                                                       | 5. Latin America & the Caribbean                                            | 6. Australia & New Zealand        | 7. Europe & Northern America | 8. Oceania (excluding Australia & New Zealand) |
| Study type                                            | 1. Cross sectional                                                          | 2. Cohort                         | 3. Case-control              | 4. Other studies using primary data ( )        |
| Study duration                                        | From DD / MM / YYYY                                                         |                                   | To DD / MM / YYYY            |                                                |
| Age of participants (years)                           | If available, mean/median ( ), range/IQR ( )                                |                                   |                              |                                                |
| Location                                              | 1. Community                                                                |                                   |                              | 2. Clinic                                      |
| Population definition                                 |                                                                             |                                   |                              |                                                |
| Sex at birth                                          | 1. Male                                                                     |                                   | 2. Female                    | 3. Intersex                                    |
| Sexuality                                             | 1. MSM                                                                      | 2. Bisexual                       | 3. Transgender               | 4. Heterosexual                                |
| Language (of full-text)                               | 1. English                                                                  |                                   | 2. Others ( )                |                                                |
| Eligibility criteria met?                             | 1. Yes                                                                      |                                   |                              | 2. No                                          |
| Reason for exclusion                                  |                                                                             |                                   |                              |                                                |
| For syphilis                                          |                                                                             |                                   |                              |                                                |
| Definition of syphilis diagnosis according to authors |                                                                             |                                   |                              |                                                |
| Diagnostic test                                       | 1. Both NTT & TT                                                            |                                   | 2. NTT only                  | 3. TT only                                     |
| Non-treponemal test (NTT)                             | 1. RPR                                                                      |                                   | 2. VDRL                      | 3. TRUST                                       |
| Treponemal test (TT)                                  | 1. TPPA                                                                     | 2. TPHA                           | 3. FTA-ABS                   | 4. MHA-TP                                      |
|                                                       | 5. ELISA                                                                    | 6. EIA                            | 7. CIA                       | 8. POCT (ICS)                                  |
| Any NTT titer information?                            | 1. Yes                                                                      |                                   |                              | 2. No                                          |
| NTT Cutoff titer for active syphilis                  | 1. 1:8                                                                      |                                   | 2. 1:16                      | 3. Other                                       |
| Outcomes (Prevalence)                                 |                                                                             |                                   |                              |                                                |
| Reported prevalence                                   | %                                                                           |                                   | 95% CI:                      |                                                |
| Number tested                                         |                                                                             |                                   | Number positive              |                                                |
| Others                                                |                                                                             |                                   |                              |                                                |
| Reference to other relevant studies                   | 1. Yes                                                                      |                                   |                              | 2. No                                          |
| Notes                                                 | HIV prevalence = (No. tested positive) / (No. tested) = % (diagnosed with ) |                                   |                              |                                                |

***Text S3. Correction of observed prevalence***

We corrected errors of known magnitude with the following formula based on the sensitivity and specificity of each assay used.<sup>291</sup> If there was a range for either the sensitivity or specificity of a specific biological assay, we used the midpoint to calculate the corrected point estimate.

$$\text{Corrected prevalence} = (\text{Observed prevalence} + \text{Specificity} - 1) / (\text{Sensitivity} + \text{Specificity} - 1)$$

**Text S4. Appraisal tool for cross-sectional studies (AXIS)**

|                     | Question                                                                                                                                             | Yes | No | Don't know/<br>Comment |
|---------------------|------------------------------------------------------------------------------------------------------------------------------------------------------|-----|----|------------------------|
| <b>Introduction</b> |                                                                                                                                                      |     |    |                        |
| 1                   | Were the aims/objectives of the study clear?                                                                                                         |     |    |                        |
| <b>Methods</b>      |                                                                                                                                                      |     |    |                        |
| 2                   | Was the study design appropriate for the stated aim(s)?                                                                                              |     |    |                        |
| 3                   | Was the sample size justified?                                                                                                                       |     |    |                        |
| 4                   | Was the target/reference population clearly defined? (Is it clear who the research was about?)                                                       |     |    |                        |
| 5                   | Was the sample frame taken from an appropriate population base so that it closely represented the target/reference population under investigation?   |     |    |                        |
| 6                   | Was the selection process likely to select subjects/participants that were representative of the target/reference population under investigation?    |     |    |                        |
| 7                   | Were measures undertaken to address and categorise non-responders?                                                                                   |     |    |                        |
| 8                   | Were the risk factor and outcome variables measured appropriate to the aims of the study?                                                            |     |    |                        |
| 9                   | Were the risk factor and outcome variables measured correctly using instruments/measurements that had been trialed, piloted or published previously? |     |    |                        |
| 10                  | Is it clear what was used to determine statistical significance and/or precision estimates? (e.g. p-values, confidence intervals)                    |     |    |                        |
| 11                  | Were the methods (including statistical methods) sufficiently described to enable them to be repeated?                                               |     |    |                        |
| <b>Results</b>      |                                                                                                                                                      |     |    |                        |
| 12                  | Were the basic data adequately described?                                                                                                            |     |    |                        |
| 13                  | Does the response rate raise concerns about non-response bias?                                                                                       |     |    |                        |
| 14                  | If appropriate, was information about non-responders described?                                                                                      |     |    |                        |
| 15                  | Were the results internally consistent?                                                                                                              |     |    |                        |
| 16                  | Were the results presented for all the analyses described in the methods?                                                                            |     |    |                        |
| <b>Discussion</b>   |                                                                                                                                                      |     |    |                        |
| 17                  | Were the authors' discussions and conclusions justified by the results?                                                                              |     |    |                        |
| 18                  | Were the limitations of the study discussed?                                                                                                         |     |    |                        |
| <b>Other</b>        |                                                                                                                                                      |     |    |                        |
| 19                  | Were there any funding sources or conflicts of interest that may affect the authors' interpretation of the results?                                  |     |    |                        |
| 20                  | Was ethical approval or consent of participants attained?                                                                                            |     |    |                        |



## Text S5. References

1. Hambie EA, Larsen SA, Perryman MW, Pettit DE, Mullally RL, Whittington W. Comparison of a new rapid plasma reagin card test with the standard rapid plasma reagin 18-mm circle card test and the venereal disease research laboratory slide test for serodiagnosis of syphilis. *J Clin Microbiol* 1983; **17**(2): 249-54.
2. Perryman MW, Larsen SA, Hambie EA, Pettit DE, Mullally RL, Whittington W. Evaluation of a new rapid plasma reagin card test as a screening test for syphilis. *J Clin Microbiol* 1982; **16**(2): 286-90.
3. Parham CE, Pettit DE, Larsen SA, Hambie EA, Perryman MW, McGrew BE. Interlaboratory comparison of the toluidine red unheated serum test antigen preparation. *J Clin Microbiol* 1984; **20**(3): 434-7.
4. Cantor AG, Pappas M, Daeges M, Nelson HD. Screening for Syphilis: Updated Evidence Report and Systematic Review for the US Preventive Services Task Force. *JAMA* 2016; **315**(21): 2328-37.
5. Sena AC, White BL, Sparling PF. Novel *Treponema pallidum* serologic tests: a paradigm shift in syphilis screening for the 21st century. *Clin Infect Dis* 2010; **51**(6): 700-8.
6. Park IU, Fakile YF, Chow JM, et al. Performance of Treponemal Tests for the Diagnosis of Syphilis. *Clin Infect Dis* 2019; **68**(6): 913-8.
7. Tinajeros F, Grossman D, Richmond K, et al. Diagnostic accuracy of a point-of-care syphilis test when used among pregnant women in Bolivia. *Sex Transm Infect* 2006; **82** Suppl 5: v17-21.
8. Nakku-Joloba E, Kiragga A, Mbazira JK, et al. Clinical Evaluation of 2 Point-of-Care Lateral Flow Tests for the Diagnosis of Syphilis. *Sex Transm Dis* 2016; **43**(10): 623-5.
9. Montoya PJ, Lukehart SA, Brentlinger PE, et al. Comparison of the diagnostic accuracy of a rapid immunochromatographic test and the rapid plasma reagin test for antenatal syphilis screening in Mozambique. *Bull World Health Organ* 2006; **84**(2): 97-104.
10. Matthias J, Dwiggins P, Totten Y, Blackmore C, Wilson C, Peterman TA. Notes from the Field: Evaluation of the Sensitivity and Specificity of a Commercially Available Rapid Syphilis Test - Escambia County, Florida, 2016. *MMWR Morb Mortal Wkly Rep* 2016; **65**(42): 1174-5.
11. Shakya G, Singh DR, Ojha HC, et al. Evaluation of SD Bioline HIV/syphilis Duo rapid test kits in Nepal. *BMC Infect Dis* 2016; **16**(1): 450.
12. Gayet-Ageron A, Lautenschlager S, Ninet B, Perneger TV, Combescure C. Sensitivity, specificity and likelihood ratios of PCR in the diagnosis of syphilis: a systematic review and meta-analysis. *Sex Transm Infect* 2013; **89**(3): 251-6.
13. HIV assays, laboratory performance and other operational characteristics, rapid diagnostic tests (combined detection of HIV-1/2 antibodies and discriminatory detection of HIV-1 and HIV-2 antibodies), report 18. Geneva, Switzerland: World Health Organization, 2015. Available at: [https://www.who.int/diagnostics\\_laboratory/evaluations/hiv/150819\\_hiv\\_assay\\_report18\\_final\\_version.pdf?ua=1](https://www.who.int/diagnostics_laboratory/evaluations/hiv/150819_hiv_assay_report18_final_version.pdf?ua=1) Accessed 1 March, 2020.
14. Bio-Rad. Genscreen ULTRA HIV Ag-Ab. Available at: [http://www.bio-rad.com/webroot/web/pdf/inserts/CDG/en/883605\\_EN.pdf](http://www.bio-rad.com/webroot/web/pdf/inserts/CDG/en/883605_EN.pdf) Accessed 1 March 2020.
15. Flores K, Leon SR. Diagnostic accuracy among 4 point-of-care tests for the screening of HIV infection. *Lab Medicine* 2013; **44**:172-175.
16. Jin F, Prestage GP, Zablotska I, et al. High rates of sexually transmitted infections in HIV positive homosexual men: Data from two community based cohorts. *Sexually Transmitted Infections* 2007; **83**(5): 397-9.
17. Lee D, Fairley C, Cummings R, Bush M, Read T, Chen M. Men who have sex with men prefer rapid testing for syphilis and may test more frequently using it. *Sexually Transmitted Diseases* 2010; **37**(9): 557-8.
18. Read PJ, Knight V, Bourne C, et al. Community event-based outreach screening for syphilis and other sexually transmissible infections among gay men in Sydney, Australia. *Sexual Health* 2013; **10**(4): 357-62.
19. Zou H, Prestage G, Fairley CK, et al. Sexual behaviors and risk for sexually transmitted infections among teenage men who have sex with men. *Journal of Adolescent Health*; **55**(2): 247-53.
20. Goddard SL, Poynten IM, Petoumenous K, et al. Prevalence, incidence and predictors of anal Chlamydia trachomatis, anal Neisseria gonorrhoeae and syphilis among older gay and bisexual men in the longitudinal Study for the Prevention of Anal Cancer (SPANAC). *Sexually Transmitted Infections* 2019: 24.
21. Integrated biological & behavioral surveillance (IBBS) in selected cities of Afghanistan. Afghanistan: National AIDS Control Program (NACP), Ministry of Health, Afghanistan, 2012.
22. National HIV serological and behavioural surveillance, 2002, Bangladesh, fourth round technical report. Bangladesh: National AIDS/STD Programme, Directorate General of Services, Ministry of Health and Family Welfare, Government of the People's Republic of Bangladesh, 2002.
23. National HIV serological and behavioural surveillance, 2003-2004, Bangladesh, fifth round technical report. Bangladesh: National AIDS/STD Programme, Directorate General of Services, Ministry of Health and Family Welfare, Government of the People's Republic of Bangladesh, 2007.
24. National HIV serological surveillance, 2004-2005, Bangladesh, sixth round technical report. Bangladesh: National AIDS/STD Programme, Directorate General of Services, Ministry of Health and Family Welfare, Government of the People's Republic of Bangladesh, 2005.

25. National HIV serological surveillance, 2006, Bangladesh, seventh round technical report. Bangladesh: National AIDS/STD Programme, Directorate General of Services, Ministry of Health and Family Welfare, Government of the People's Republic of Bangladesh, 2007.
26. National HIV serological surveillance, 2007, Bangladesh, eighth round technical report. Bangladesh: National AIDS/STD Programme, Directorate General of Services, Ministry of Health and Family Welfare, Government of the People's Republic of Bangladesh, 2008.
27. National HIV serological surveillance, 2011, Bangladesh, ninth round technical report. Bangladesh: National AIDS/STD Programme, Directorate General of Services, Ministry of Health and Family Welfare, Government of the People's Republic of Bangladesh, 2011.
28. Rana AK, Reza MM, Alam MS, Khatun M, Khan SI, Azim T. Effects of In-country and Cross-Border Mobility on Condom Use Among Transgender Women (hijras) in Bangladesh: A Cross-Sectional Study. *AIDS and behavior* 2016; **20**(10): 2165-77.
29. Behavioural and serological surveillance on males having sex with males, male sex workers and hijra, 2015. Bangladesh: AIDS/STD Programme, Directorate General of Services, Ministry of Health and Family Welfare, Government of the People's Republic of Bangladesh, 2017.
30. Integrated biological and behavioral surveillance (IBBS) surveys among vulnerable and key populations at higher risk in Bhutan, 2016. Bhutan: School of Planning Monitoring Evaluation and Research (SPMER), 2016. .
31. Schneider JA, Lakshmi V, Dandona R, Kumar GA, Sudha T, Dandona L. Population-based seroprevalence of HSV-2 and syphilis in Andhra Pradesh state of India. *BMC Infectious Diseases* 2010; **10** (no pagination)(59).
32. Solomon SS, Srikrishnan AK, Sifakis F, et al. The emerging HIV epidemic among men who have sex with men in Tamil Nadu, India: geographic diffusion and bisexual concurrency. *AIDS and behavior* 2010; **14**(5): 1001-10.
33. Ramakrishnan L, Ramanathan S, Chakrapani V, et al. Comparison of Sexual Risk, HIV/STI Prevalence and Intervention Exposure Among Men Who Have Sex with Men and Women (MSMW) and Men Who Have Sex with Men Only (MSMO) in India: Implications for HIV Prevention. *AIDS and behavior* 2015; **19**(12): 2255-69.
34. Solomon SS, Mehta SH, Srikrishnan AK, et al. High HIV prevalence and incidence among MSM across 12 cities in India. *Aids* 2015; **29**(6): 723-31.
35. Das A, George B, Ranebennur V, et al. Getting to the First 90: Incentivized Peer Mobilizers Promote HIV Testing Services to Men Who Have Sex With Men Using Social Media in Mumbai, India. *Global health, science and practice* 2019; **7**(3): 469-77.
36. Integrated bio-behavioral survey (IBBS) among MSM population in Kathmandu Valley. Nepal: Center for Research on Environment Health and Population Activities (CREHPA), 2005.
37. Integrated bio-behavioral survey (IBBS) among men who have sex with men in the Kathmandu Valley-2007. Nepal: New ERA, 2008.
38. Integrated biological and behavioral surveillance survey (IBBS) among men who have sex with men (MSM) in the Kathmandu Valley Round III-2009. Nepal: New ERA, 2009.
39. Integrated biological and behavioral surveillance (IBBS) survey among men who have sex with men (MSM) and transgender (TG) people in Kathmandu Valley, Nepal Round IV-2012. Kathmandu, Nepal: Ministry of Health, National Centre for AIDS and STD Control, 2013.
40. Integrated biological and behavioral surveillance survey (IBBS) among men who have sex with men (MSM) & transgender (TG) people in Kathmandu Valley, 2015, Round V. Kathmandu, Nepal: Ministry of Health, National Centre for AIDS and STD Control, 2015.
41. Integrated biological and behavioral surveillance (IBBS) survey among men who have sex with men (MSM) and transgender (TG) in Kathmandu Valley, Round VI. Kathmandu, Nepal: Ministry of Health, National Centre for AIDS and STD Control, 2017.
42. National study of reproductive tract and sexually transmitted infections, survey of high risk groups in Lahore and Karachi, 2005. Pakistan: National AIDS Control Program, Ministry of Health, Government of Pakistan, 2005.
43. Hawkes S, Collumbien M, Platt L, et al. HIV and other sexually transmitted infections among men, transgenders and women selling sex in two cities in Pakistan: A cross-sectional prevalence survey. *Sexually Transmitted Infections* 2009; **85**(SUPPL. 2): ii8-ii16.
44. Integrated biological and behavioural surveillance (IBBS) survey among key populations at higher risk of HIV in Sri Lanka. Sri Lanka: National STD/AIDS Control Programme (NSACP), 2015.
45. Integrated biological and behavioural surveillance (IBBS) survey among key populations at higher risk of HIV in Sri Lanka. Sri Lanka: National STD/AIDS Control Programme (NSACP), 2018.
46. Gulov K, Coulter RW, Matthews DD, Uzzi M, Stall R. HIV and STIs Among MSM in Tajikistan: Laboratory-Confirmed Diagnoses and Self-Reported Testing Behaviors. *AIDS and behavior* 2016; **20**(Supplement 3): 341-9.
47. Girault P, Saidel T, Song N, et al. HIV, STIs, and sexual behaviors among men who have sex with men in Phnom Penh, Cambodia. *AIDS Education and Prevention* 2004; **16**(1): 31-44.
48. Sopheab H, Morineau G, Neal JJ, et al. 2005 Cambodia STI prevalence survey, integrated biological and behavioral survey, sexually transmitted infections and related behaviors among brothel-based female sex workers, police, and men who have sex with men. Cambodia: National Center for HIV/AIDS, Dermatology and STDs, 2005.
49. Jiang J, Cao N, Zhang J, et al. High prevalence of sexually transmitted diseases among men who have sex with men in Jiangsu Province, China. *Sexually Transmitted Diseases* 2006; **33**(2): 118-23.

50. Ma X, Zhang Q, He X, et al. Trends in prevalence of HIV, syphilis, hepatitis C, hepatitis B, and sexual risk behavior among men who have sex with men: Results of 3 consecutive respondent-driven sampling surveys in Beijing, 2004 through 2006. *Journal of Acquired Immune Deficiency Syndromes* 2007; **45**(5): 581-7.
51. He Q, Wang Y, Lin P, et al. Potential bridges for HIV infection to men who have sex with men in Guangzhou, China. *AIDS & Behavior* 2006; **10**(4 Suppl): S17-23.
52. Choi KH, Ning Z, Gregorich SE, Pan QC. The influence of social and sexual networks in the spread of HIV and syphilis among men who have sex with men in Shanghai, China. *Journal of Acquired Immune Deficiency Syndromes* 2007; **45**(1): 77-84.
53. Ruan Y, Li D, Li X, et al. Relationship between syphilis and HIV infections among men who have sex with men in Beijing, China. *Sexually Transmitted Diseases* 2007; **34**(8): 592-7.
54. Zhang X, Wang C, Hengwei W, et al. Risk factors of HIV infection and prevalence of co-infections among men who have sex with men in Beijing, China. *Aids* 2007; **21**(SUPPL. 8): S53-S7.
55. Ye S, Xiao Y, Jin C, et al. Effectiveness of Integrated HIV Prevention Interventions among Chinese Men Who Have Sex with Men: Evaluation of a 16-City Public Health Program. *PLoS ONE* 2012; **7** (12) (no pagination)(e50873).
56. Xiao Y, Sun J, Li C, et al. Prevalence and correlates of HIV and syphilis infections among men who have sex with men in seven Provinces in China with historically low HIV prevalence. *Journal of Acquired Immune Deficiency Syndromes* 2010; **53**(SUPPL. 1): S66-S73.
57. Zhang Y, Chen P, Lu R, et al. Prevalence of HIV among men who have sex with men in chongqing, China, 2006-2009: Cross-sectional biological and behavioural surveys. *Sexually Transmitted Infections* 2012; **88**(6): 444-50.
58. Zeng G, Feng L, Ouyang L, et al. The dynamic trends of HIV prevalence, risks, and prevention among men who have sex with men in Chongqing, China. *BioMed Research International* 2014; **2014** (no pagination)(602719).
59. He Q, Wang Y, Lin P, et al. High prevalence of risk behaviour concurrent with links to other high-risk populations: A potentially explosive HIV epidemic among men who have sex with men in Guangzhou, China. *Sexually Transmitted Infections* 2009; **85**(5): 383-90.
60. Wang K, Yan H, Liu Y, Leng Z, Wang B, Zhao J. Increasing prevalence of HIV and syphilis but decreasing rate of self-reported unprotected anal intercourse among men who had sex with men in Harbin, China: Results of five consecutive surveys from 2006 to 2010. *International Journal of Epidemiology* 2012; **41**(2): 423-32.
61. Guo H, Wei JF, Yang H, Huan X, Tsui SKW, Zhang C. Rapidly increasing prevalence of HIV and syphilis and HIV-1 subtype characterization among men who have sex with men in Jiangsu, China. *Sexually Transmitted Diseases* 2009; **36**(2): 120-5.
62. Xu JJ, Zhang M, Brown K, et al. Syphilis and HIV seroconversion among a 12-month prospective cohort of men who have sex with men in Shenyang, China. *Sexually Transmitted Diseases* 2010; **37**(7): 432-9.
63. Feng TJ, Liu XL, Cai YM, et al. Prevalence of syphilis and human immunodeficiency virus infections among men who have sex with men in shenzhen, China: 2005 to 2007. *Sexually Transmitted Diseases* 2008; **35**(12): 1022-4.
64. Ruan Y, Luo F, Jia Y, et al. Risk factors for syphilis and prevalence of HIV, hepatitis B and C among men who have sex with men in Beijing, China: Implications for HIV prevention. *AIDS and Behavior* 2009; **13**(4): 663-70.
65. Zheng J, Wu Z, Poundstone KE, Pang L, Rou K. HIV, syphilis infection, and risky sexual behaviors among male university students who have sex with men in Beijing, China: A cross-sectional study. *AIDS Education and Prevention* 2012; **24**(1): 78-88.
66. Zou H, Wu Z, Yu J, et al. Sexual risk behaviors and HIV infection among men who have sex with men who use the internet in Beijing and Urumqi, China. *Journal of Acquired Immune Deficiency Syndromes* 2010; **53**(SUPPL. 1): S81-S7.
67. Feng Y, Wu Z, Detels R, et al. HIV/STD prevalence among men who have sex with men in Chengdu, China and associated risk factors for HIV infection. *Journal of Acquired Immune Deficiency Syndromes* 2010; **53**(SUPPL. 1): S74-S80.
68. Xiao Y, Ding X, Li C, Liu J, Sun J, Jia Y. Prevalence and correlates of hiv and syphilis infections among men who have sex with men in chongqing municipality, China. *Sexually Transmitted Diseases* 2009; **36**(10): 647-56.
69. Guo W, Wu ZY, Song AJ, Poundstone K. Impact of HIV/sexually transmitted infection testing on risky sexual behaviors among men who have sex with men in Langfang, China. *Chinese Medical Journal* 2013; **126**(7): 1257-63.
70. Zhu WM, Lin HJ, Zhang YF, et al. Human immunodeficiency virus/sexually transmitted infection, risk behavior and sexual networks among men who have sex with men in Taizhou city, Zhejiang province. [Chinese]. *Zhonghua liu xing bing xue za zhi = Zhonghua liuxingbingxue zazhi* 2008; **29**(10): 994-8.
71. Wang X, Lan G, Shen Z, et al. HIV and syphilis prevalence trends among men who have sex with men in Guangxi, China: Yearly cross-sectional surveys, 2008-2012. *BMC Infectious Diseases* 2014; **14** (1) (no pagination)(367).
72. Li SM, Zhou ZH, Jiang SL, et al. [Incidence and risk factors of HIV and syphilis seroconversion among men who have sex with men in Beijing]. [Chinese]. *Zhonghua yu fang yi xue za zhi [Chinese journal of preventive medicine]* 2011; **45**(2): 118-22.
73. She M, Zhang H, Wang J, et al. Associated factors for HIV and syphilis infection among men who have sex with men only and men who have sex with both men and women in cities of China. *International Journal of STD and AIDS* 2013; **24**(4): 293-300.

74. Ma W, Wu G, Zheng H, et al. Prevalence and risk factors of HIV and syphilis, and knowledge and risk behaviors related to HIV/AIDS among men who have sex with men in Chongqing, China. *Journal of Biomedical Research* 2016; **30**(2): 101-11.
75. Zhong F, Liang B, Xu H, et al. Increasing HIV and decreasing syphilis prevalence in a context of persistently high unprotected anal intercourse, six consecutive annual surveys among men who have sex with men in Guangzhou, China, 2008 to 2013. *PLoS ONE* 2014; **9** (7) (no pagination)(e103136).
76. Yan H, Li J, Raymond HF, et al. Increased HIV testing among men who have sex with men from 2008 to 2012, Nanjing, China. *PLoS ONE* 2016; **11** (4) (no pagination)(e0154466).
77. Cai WD, Zhao J, Zhao JK, et al. HIV prevalence and related risk factors among male sex workers in Shenzhen, China: Results from a time-location sampling survey. *Sexually Transmitted Infections* 2010; **86**(1): 15-20.
78. Bai H, Huan X, Tang W, et al. A survey of HIV infection and related high-risk factors among men who have sex with men in Suzhou, Jiangsu, China. *Journal of Biomedical Research* 2011; **25**(1): 17-24.
79. Xu JJ, Reilly KH, Lu CM, et al. A cross-sectional study of HIV and syphilis infections among male students who have sex with men (MSM) in northeast China: implications for implementing HIV screening and intervention programs. *BMC public health* 2011; **11**: 287.
80. Wu Z, Liu E, Mao Y, et al. HIV and syphilis prevalence among men who have sex with men: A cross-sectional survey of 61 cities in China. *Clinical Infectious Diseases* 2013; **57**(2): 298-309.
81. Chen L, Mahapatra T, Fu G, et al. Male clients of male sex workers in China: An ignored high-risk population. *Journal of Acquired Immune Deficiency Syndromes* 2016; **71**(3): 316-22.
82. Cao Z, Xu J, Zhang H, et al. Risk factors for syphilis among married men who have sex with men in China. *Sexually Transmitted Diseases* 2014; **41**(2): 98-102.
83. Gao W, Li Z, Li Y, Qiao X. Sexual practices and the prevalence of HIV and syphilis among men who have sex with men in Lanzhou, China. *Japanese Journal of Infectious Diseases* 2015; **68**(5): 370-5.
84. Zhao J, Chen L, Cai WD, et al. HIV infection and sexual behaviors among non-commercial men who have sex with men at different venues. *Archives of sexual behavior* 2014; **43**(4): 801-9.
85. Liao M, Kang D, Jiang B, et al. Bisexual behavior and infection with HIV and syphilis among men who have sex with men along the east coast of China. *AIDS Patient Care and STDs* 2011; **25**(11): 683-91.
86. Qin Q, Tang W, Ge L, et al. Changing trend of HIV, Syphilis and Hepatitis C among Men Who Have Sex with Men in China. *Scientific reports* 2016; **6**: 31081.
87. Fan S, Lu H, Ma X, et al. Behavioral and serologic survey of men who have sex with Men in Beijing, China: Implication for HIV intervention. *AIDS Patient Care and STDs* 2012; **26**(3): 148-55.
88. Mao H, Ma W, Lu H, et al. High incidence of HIV and syphilis among migrant men who have sex with men in Beijing, China: A prospective cohort study. *BMJ Open* 2014; **4** (9) (no pagination)(e005351).
89. Li D, Li S, Liu Y, et al. HIV incidence among men who have sex with men in Beijing: A prospective cohort study. *BMJ Open* 2012; **2** (6) (no pagination)(e001829).
90. Chen X, Li X, Zheng J, et al. Club drugs and HIV/STD infection: An exploratory analysis among men who have sex with men in Changsha, China. *PLoS ONE* 2015; **10** (5) (no pagination)(e0126320).
91. Zhang L, Ding X, Lu R, et al. Predictors of hiv and syphilis among men who have sex with men in a chinese metropolitan city: Comparison of risks among students and non-students. *PLoS ONE* 2012; **7** (5) (no pagination)(e37211).
92. Yang HT, Tang W, Xiao ZP, et al. Worsening epidemic of HIV and syphilis among men who have sex with men in Jiangsu Province, China. *Clinical Infectious Diseases* 2014; **58**(12): 1753-9.
93. Jia Z, Huang X, Wu H, et al. HIV burden in men who have sex with men: a prospective cohort study 2007-2012. *Scientific reports* 2015; **5**: 11205.
94. Li D, Yang X, Zhang Z, et al. Incidence of Co-infections of HIV, herpes simplex virus type 2 and syphilis in a large cohort of men who have sex with men in Beijing, China. *PLoS ONE* 2016; **11** (1) (no pagination)(e0147422).
95. Wang QQ, Chen XS, Yin YP, et al. HIV prevalence, incidence and risk behaviours among men who have sex with men in Yangzhou and Guangzhou, China: A cohort study. *Journal of the International AIDS Society* 2014; **17** (no pagination)(18849).
96. Huan XP, Yin YP, Fu GF, et al. [Analysis on sexually transmitted diseases and the related risk factors among men who have sex with men in Jiangsu province]. [Chinese]. *Zhonghua yu fang yi xue za zhi [Chinese journal of preventive medicine]* 2011; **45**(11): 975-8.
97. Luo HB, Mei JY, Song LJ, et al. A comprehensive surveillance on HIV among 1,237 men who have sex with men in thirteen cities of Yunnan. [Chinese]. *Zhonghua liu xing bing xue za zhi = Zhonghua liuxingbingxue zazhi* 2012; **33**(7): 706-9.
98. Chen Y, Tang W, Chen L, et al. Changing Epidemic of HIV and Syphilis Among Resident and Migrant Men Who Have Sex with Men in Jiangsu, China. *Scientific reports* 2017; **7**(1): 9478.
99. Hu J, Gu X, Tao X, et al. Prevalence and trends of HIV, syphilis, and HCV in migrant and resident men who have sex with men in Shandong, China: Results from a serial cross-sectional study. *PLoS ONE* 2017; **12** (1) (no pagination)(e0170443).
100. Zhang X, Yu J, Sun X, et al. Prevalence and related risk behaviors of HIV, syphilis, and anal HPV infection among men who have sex with men from Beijing, China. *AIDS and behavior* 2013; **17**(3): 1129-36.

101. Wu J, Wu H, Li P, Lu C. HIV/STIs risks between migrant MSM and local MSM: A cross-sectional comparison study in China. *PeerJ* 2016; **2016 (7) (no pagination)**(e2169).
102. Xu J, An M, Han X, et al. Prospective cohort study of HIV incidence and molecular characteristics of HIV among men who have sex with men(MSM) in Yunnan Province, China. *BMC Infectious Diseases* 2013; **13**: 3.
103. Zhao J, Cai R, Chen L, et al. A comparison between respondent-driven sampling and time-location sampling among men who have sex with men in Shenzhen, China. *Archives of sexual behavior* 2015; **44(7)**: 2055-65.
104. Zhou H, Zhao C, Liu X, et al. The analysis of AIDS monitoring conditions among 400 MSMs in Shijiazhuang. *J Med Pest Control* 2011; **27(11)**: 1007-9.
105. Liu J, Qu B, Ezeakile MC, Zhang Y, Liang S. Factors associated with HIV infection among men who have sex with men in Henan Province, China: a cross-sectional study. *BMC public health* 2013; **13**: 356.
106. Tao J, Ruan Y, Yin L, et al. Sex with women among men who have sex with men in China: Prevalence and sexual practices. *AIDS Patient Care and STDs* 2013; **27(9)**: 524-8.
107. Fan W, Yin L, Qian HZ, et al. HIV risk perception among HIV negative or status-unknown men who have sex with men in China. *BioMed Research International* 2014; **2014 (no pagination)**(232451).
108. Zhang H, Lu H, Pan SW, et al. Correlates of unprotected anal intercourse: the influence of anal sex position among men who have sex with men in Beijing, china. *Arch Sex Behav* 2015; **44(2)**: 375-87.
109. Huang D, Hu Y, Wu G, et al. HIV prevention services and testing utilization behaviors among men who have sex with men at elevated risk for HIV in Chongqing, china. *BioMed Research International* 2014; **2014 (no pagination)**(174870).
110. Cai Y, Liu H, Song Y, Hong F. Factors associated with HIV and syphilis infection among men who have sex with men blood donors in Shenzhen. [Chinese]. *Zhonghua yu fang yi xue za zhi [Chinese journal of preventive medicine]* 2014; **48(2)**: 128-32.
111. Wang L, Norris JL, Li DM, Guo W, Ding ZW, Wang N. HIV prevalence and influencing factors analysis of sentinel surveillance among men who have sex with men in China, 2003 - 2011. *Chinese medical journal* 2012; **125(11)**: 1857-61.
112. Qi J, Zhang D, Fu X, et al. High risks of HIV transmission for men who have sex with men - A comparison of risk factors of HIV infection among MSM associated with recruitment channels in 15 cities of China. *PLoS ONE* 2015; **10 (4) (no pagination)**(e0121267).
113. LAN G, Chen Y, Zhang H, Zhu Q. HIV prevalence and risk factors among MSM in Bathrooms in Guangxi. *J Prev Med Inf* 2014; **30(2)**: 87-9.
114. Hu H, Liu X, Zhang Z, et al. Increasing HIV Incidence among Men Who Have Sex with Men in Jiangsu Province, China: Results from Five Consecutive Surveys, 2011-2015. *International Journal of Environmental Research & Public Health [Electronic Resource]* 2016; **13(8)**: 06.
115. Wang N, Wu G, Lu R, et al. Investigating HIV Infection and HIV Incidence Among Chinese Men Who Have Sex with Men with Recent Sexual Debut, Chongqing, China, 2011. *AIDS and behavior* 2016; **20(12)**: 2976-82.
116. Luo Y, Zhu C, Chen S, et al. Risk factors for HIV and syphilis infection among male sex workers who have sex with men: a cross-sectional study in Hangzhou, China, 2011. *BMJ open* 2015; **5(4)**: e006791.
117. Zhang L, Zhang D, Yu B, et al. Prevalence of HIV Infection and Associated Risk Factors among Men Who Have Sex with Men (MSM) in Harbin, P. R. China. *PLoS ONE* 2013; **8 (3) (no pagination)**(e58440).
118. Liao M, Kang D, Tao X, et al. Alcohol use, stigmatizing/discriminatory attitudes, and HIV high-risk sexual behaviors among men who have sex with men in China. *Biomed Res Int* 2014; **2014**: 143738.
119. Wu ZL, Guan GY, Zhao JH, et al. Dynamic Characteristics and HIV Infection of Men who have Sex with Men from 2011 to 2017 in Yinchuan, Ningxia, China. *Current HIV research* 2018; **16(5)**: 364-73.
120. Fan W, Lu R, Wu G, et al. Alcohol drinking and HIV-related risk among men who have sex with men in Chongqing, China. *Alcohol* 2016; **50**: 1-7.
121. Pan S, Xu JJ, Han XX, et al. Internet-Based Sex-Seeking Behavior Promotes HIV Infection Risk: A 6-Year Serial Cross-Sectional Survey to MSM in Shenyang, China. *BioMed Research International* 2016; **2016 (no pagination)**(2860346).
122. Qu L, Wang W, Gao Y, et al. A Cross-sectional Survey of HIV Transmission and Behavior among Men Who Have Sex with Men in Different Areas of Inner Mongolia Autonomous Region, China. *BMC public health* 2016; **16(1)**: 1161.
123. Liang L, Zhang J, Liu L, Luo Y, Pei X, Hu Y. Infection status of HIV and its influence factors among men who have sex with men in Sichuan province. [Chinese]. *Zhonghua yu fang yi xue za zhi [Chinese journal of preventive medicine]* 2014; **48(11)**: 980-4.
124. Chu ZX, Xu JJ, Zhang YH, et al. Poppers use and Sexual Partner Concurrency Increase the HIV Incidence of MSM: a 24-month Prospective Cohort Survey in Shenyang, China. *Scientific reports* 2018; **8(1)**: 24.
125. Mao X, Hu Q, Huang C, et al. HIV incidence is rapidly increasing with age among young men who have sex with men in China: a multicentre cross-sectional survey. *HIV Medicine* 2018; **19(8)**: 513-22.
126. Xu JJ, Zhang C, Hu QH, et al. Recreational drug use and risks of HIV and sexually transmitted infections among Chinese men who have sex with men: Mediation through multiple sexual partnerships. *BMC Infectious Diseases* 2014; **14 (1) (no pagination)**(642).

127. Guanghua L, Yi C, Shuai T, et al. HIV, syphilis and behavioral risk factors among men who have sex with men in a drug-using area of southwestern China: Results of 3 cross-sectional surveys from 2013 to 2015. *Medicine* 2018; **97**(16): e0404.
128. Zhang Y, Wu G, Lu R, et al. What has changed HIV and syphilis infection among men who have sex with men (MSM) in Southwest China: a comparison of prevalence and behavioural characteristics (2013-2017). *BMC public health* 2019; **19**(1): 1314.
129. Wu H, Xiu C, Fu X, et al. Syphilis associated with recreational drug use, depression and high-risk sexual behaviour in men who have sex with men: A case-control study in China. *Sexually Transmitted Infections* 2019.
130. Ding W, Zhang Y. Survey on knowledge, attitude and practice about HIV/syphilis among MSM, Qingzhou city, 2013. *Prev Med Trib* 2014; **20**(2): 112-4.
131. Zhang J, Xu JJ, Song W, et al. HIV Incidence and Care Linkage among MSM First-Time-Testers in Shenyang, China 2012-2014. *AIDS & Behavior* 2018; **22**(3): 711-21.
132. Cai YM, Song YJ, Liu H, Hong FC. Factors associated with commercial sexual behavior among men who have sex with men in Shenzhen, China, in 2011-2015. [Chinese]. *Zhonghua yu fang yi xue za zhi [Chinese journal of preventive medicine]* 2016; **50**(11): 943-8.
133. Liu Y, Li D, Vermund SH, et al. Associations of current marital status and living arrangements with HIV and syphilis risk: findings from a community-based sample of men who have sex with men in China. *AIDS Care - Psychological and Socio-Medical Aspects of AIDS/HIV* 2016; **28**(11): 1461-6.
134. Li R, Pan X, Ma Q, et al. Prevalence of prior HIV testing and associated factors among MSM in Zhejiang Province, China: a cross-sectional study. *BMC Public Health* 2016; **16**(1): 1152.
135. Liu YY, Tao HD, Liu J, et al. Prevalence and associated factors of HIV infection among men who have sex with men in Hefei, China, 2013-2014: a cross-sectional study. *International Journal of STD and AIDS* 2016; **27**(4): 305-12.
136. Huang Y, Zhang Y, Li K, Zhao J. Changes in prevalence of HIV or syphilis among male sex workers and non-commercial men who have sex with men in Shenzhen, China: Results of a second survey. *PLoS ONE* 2016; **11** (12) (no pagination)(e0167619).
137. Li Q, Li X, Luo Y, et al. HIV incidence and cohort retention among men who have sex with men in Hangzhou, China: A prospective cohort study. *Medicine (United States)* 2019; **98** (40) (no pagination)(e17419).
138. Zhang X, Jia M, Chen M, et al. Prevalence and the associated risk factors of HIV, STIs and HBV among men who have sex with men in Kunming, China. *International Journal of STD and AIDS* 2017; **28**(11): 1115-23.
139. Dorjiwangmo, Lu S, Iasi, et al. Epidemiological survey of prevalence of HIV infection, syphilis and hepatitis C in female sex workers and other 6 risk populations in Tibet Autonomous Region. [Chinese]. *Chinese Journal of Endemiology* 2017; **38**(7): 921-5.
140. Liu Y, Tang H, Ning Z, Zheng H, He N, Zhang Y. Co-infections of HIV, syphilis and HSV-2 among men who have sex with men at the voluntary HIV counseling and testing clinics in Shanghai. [Chinese]. *Chinese Journal of Endemiology* 2017; **38**(10): 1363-6.
141. An X, Sun Q, Fang F, et al. The Prevalence of Depression Associated with the Infection Status and Sexual Behaviors among Men Who Have Sex with Men in Shenzhen, China: A Cross-Sectional Study. *International Journal of Environmental Research & Public Health [Electronic Resource]* 2019; **17**(1): 23.
142. Wei L, Chen L, Zhang H, et al. Use of gay app and the associated HIV/syphilis risk among non-commercial men who have sex with men in Shenzhen, China: A serial cross-sectional study. *Sexually Transmitted Infections* 2019.
143. Bai JY, Ning TL, Zhou N, Guo Y, Yu MH. [HIV infection status and related factors in men who have sex with men in sentinel surveillance in Tianjin, 2016-2018][Chinese]. *Chung-Hua Liu Hsing Ping Hsueh Tsa Chih Chinese Journal of Epidemiology*; **40**(9): 1106-10.
144. Liao M, Liu D, Zhu X, et al. Behavior and influencing factors of HIV infection among men who have sex with men only and men who have sex with both men and women in Shandong province. [Chinese]. *Chinese Journal of Endemiology* 2019; **40**(8): 941-6.
145. Pisani E, Girault P, Gultom M, et al. HIV, syphilis infection, and sexual practices among transgenders, male sex workers, and other men who have sex with men in Jakarta, Indonesia. *Sexually Transmitted Infections* 2004; **80**(6): 536-40.
146. Technical Report: 2013 sero-surveillance survey and 2013 rapid behavioral survey. Indonesia: Ministry of Health, National AIDS Commission, 2013.
147. Itoda I, Hoshino S, Sawada T, et al. [Prevalence of HIV and sexually transmitted infections and characteristics of men who have sex with men at a community-based center in Yokohama, Japan]. [Japanese]. *[Nihon koshu eisei zasshi] Japanese journal of public health* 2013; **60**(5): 253-61.
148. Wickersham JA, Gibson BA, Bazazi AR, et al. Prevalence of Human Immunodeficiency Virus and Sexually Transmitted Infections among Cisgender and Transgender Women Sex Workers in Greater Kuala Lumpur, Malaysia: Results from a Respondent-Driven Sampling Study. *Sexually Transmitted Diseases* 2017; **44**(11): 663-70.
149. Davaalkham J, Unenchimeg P, Baigalmaa C, et al. High-risk status of HIV-1 infection in the very low epidemic country, Mongolia, 2007. *Int J STD AIDS* 2009; **20**(6): 391-4.
150. Second generation HIV and STI surveillance report, 2011. Mongolia: Ministry of Health, 2012.
151. HIV/STI surveillance survey report, 2014. Mongolia: Ministry of Health and Sports, 2014.
152. Report of the HIV sentinel sero-surveillance survey 2007 Myanmar. Myanmar: National AIDS Programme, Department of Health, Ministry of Health, 2007.

153. Report of the HIV sentinel sero-surveillance survey 2008 Myanmar. Myanmar: National AIDS Programme, Department of Health, Ministry of Health, 2009.
154. Results of HIV sentinel sero-surveillance 2009 Myanmar. Myanmar: National AIDS Programme, Department of Health, Ministry of Health, 2010.
155. Results of HIV sentinel sero-surveillance 2010 Myanmar. Myanmar: National AIDS Programme, Department of Health, Ministry of Health, 2011.
156. Results of HIV sentinel sero-surveillance 2011 Myanmar. Myanmar: National AIDS Programme, Department of Health, Ministry of Health, 2012.
157. HIV sentinel sero-surveillance survey report, 2012. Myanmar: National AIDS Programme, Department of Health, Ministry of Health, 2013.
158. 2013 Integrated HIV behavioral and serologic surveillance (IHBSS) among higher risk transgender women in Cebu city, Philippines. Philippines: National Epidemiology Center, Department of Health, 2014.
159. Jung M, Lee J, Kwon DS, Park BJ. Comparison of sexual risky factors of men who have sex with men and sex-buying men as groups vulnerable to sexually transmitted diseases. *Journal of Preventive Medicine and Public Health* 2012; **45**(3): 156-63.
160. Ananworanich J, Chitwarakorn A, Wimonasate W, et al. HIV and syphilis infection among men who have sex with men - Bangkok, Thailand, 2005-2011. *Morbidity and Mortality Weekly Report* 2013; **62**(25): 518-20.
161. Holtz TH, Thienkrua W, McNicholl JM, et al. Prevalence of *Treponema pallidum* seropositivity and herpes simplex virus type 2 infection in a cohort of men who have sex with men, Bangkok, Thailand, 2006-2010. *International Journal of STD and AIDS* 2012; **23**(6): 424-8.
162. Van Griensven F, Thienkrua W, McNicholl J, et al. Evidence of an explosive epidemic of HIV infection in a cohort of men who have sex with men in Thailand. *Aids* 2013; **27**(5): 825-32.
163. Phanuphak N, Sungsing T, Jantarapakde J, et al. Princess PrEP program: The first key population-led model to deliver pre-exposure prophylaxis to key populations by key populations in Thailand. *Sexual Health* 2018; **15**(6): 542-55.
164. Pisani E, Purnomo H, Sutrisna A, et al. Basing policy on evidence: Low HIV, STIs, and risk behaviour in Dili, East Timor argue for more focused interventions. *Sexually Transmitted Infections* 2006; **82**(1): 88-93.
165. Integrated biological-behavioral surveillance surveys among female sex workers and men who have sex with men in Timor-Leste, 2016-2017. Timor-Leste: Australasian Society for HIV, Viral Hepatitis and Sexual Health Medicine (ASHM), 2017.
166. Pham QD, Nguyen TV, Hoang CQ, et al. Prevalence of HIV/STIs and associated factors among men who have sex with men in An Giang, Vietnam. *Sexually Transmitted Diseases* 2012; **39**(10): 799-806.
167. Results from the HIV/STI integrated biological and behavioral surveillance (IBBS) in Vietnam - Round II 2009. Vietnam: Ministry of Health, Vietnam, 2011.
168. Nguyen TV, Van Khuu N, Nguyen PD, et al. Sociodemographic Factors, Sexual Behaviors, and Alcohol and Recreational Drug Use Associated with HIV Among Men Who Have Sex with Men in Southern Vietnam. *AIDS and behavior* 2016; **20**(10): 2357-71.
169. Colby D, Nguyen NA, Le B, et al. HIV and Syphilis Prevalence Among Transgender Women in Ho Chi Minh City, Vietnam. *AIDS and behavior* 2016; **20**(Supplement 3): 379-85.
170. Reyniers T, Nostlinger C, Laga M, et al. Choosing Between Daily and Event-Driven Pre-exposure Prophylaxis: Results of a Belgian PrEP Demonstration Project. *J Acquir Immune Defic Syndr* 2018; **79**(2): 186-94.
171. Ravlija J, Jandric L, Zeljko M, Kurtovic A. Research of risk behaviour with regard to HIV prevalence in groups at increased risk. Sarajevo, Bosnia-Herzegovina: Partnerships in Health, 2011.
172. Ravlija J, Jandric L, Vilic-Svraka A, Stojisavljevic S. Research on risk behaviour in relation to HIV/STI prevalence among groups exposed to higher risk (MSM and SW) in Bosnia and Herzegovina, 2012. Bosnia and Herzegovina: 2012.
173. Nelson LE, Tharao W, Husbands W, et al. The epidemiology of HIV and other sexually transmitted infections in African, Caribbean and Black men in Toronto, Canada. *BMC Infectious Diseases* 2019; **19** (1) (no pagination)(294).
174. Bozicevic I, Rode OD, Lepej SZ, et al. Prevalence of sexually transmitted infections among men who have sex with men in Zagreb, Croatia. *AIDS and Behavior* 2009; **13**(2): 303-9.
175. Bozicevic I, Lepej SZ, Rode OD, et al. Prevalence of HIV and sexually transmitted infections and patterns of recent HIV testing among men who have sex with men in Zagreb, Croatia. *Sexually Transmitted Infections* 2012; **88**(7): 539-44.
176. Vilibic-Cavlek T, Kolaric B, Pavlic J, Kosanovic-Licina ML, Nemeth-Blazic T. Seroprevalence and risk factors for HIV, hepatitis B, and syphilis in populations with high-risk behaviors in Croatia. *Acta Dermatovenerologica Croatica* 2018; **26**(4): 314-20.
177. Ruutel K, Lohmus L, Janes J. Internet-based recruitment system for HIV and STI screening for men who have sex with men in Estonia, 2013: Analysis of preliminary outcomes. *Eurosurveillance* 2015; **20** (15) (no pagination)(21094).
178. Zorzi A, Cordioli M, Gios L, et al. Field evaluation of two point-of-care tests for syphilis among men who have sex with men, Verona, Italy. *Sexually transmitted infections* 2017; **93**(S4): S51-S8.
179. Mikik V, Kuzmanovska G, Memeti S. Report from the bio behavioural survey and assessment of population size of man having sex with man in Macedonia, 2010. Institute for Public Health of Republic of Macedonia, Ministry of Health of Republic of Macedonia, 2011.



180. Report on the bio-behavioral study among "men having sex with men" population in Skopje, Macedonia 2013-2014. Skopje, Macedonia: Ministry of Health of Republic of Macedonia, 2014.
181. HIV sentinel surveillance in high-risk groups in Azerbaijan, the Republic of Moldova and the Russian Federation. Copenhagen Denmark: Regional Office for Europe of the World Health Organization, 2004.
182. [Studiul comportamental și de seroprevalență Moldova 2007]. [Romanian]. Moldova: National Center of Health Management, 2008.
183. Zohrabyan L, Johnston L, Scutelnicuic O, et al. HIV, hepatitis and syphilis prevalence and correlates of condom use during anal sex among men who have sex with men in the Republic of Moldova. *International Journal of STD and AIDS* 2013; **24**(5): 357-64.
184. Hoornenborg E, Achterbergh RCA, van der Loeff MFS, et al. Men who have sex with men more often chose daily than event-driven use of pre-exposure prophylaxis: Baseline analysis of a demonstration study in Amsterdam. *Journal of the International AIDS Society* 2018; **21** (3) (no pagination)(e25105).
185. Amirkhanian YA, Kelly JA, Kirsanova AV, et al. HIV risk behaviour patterns, predictors, and sexually transmitted disease prevalence in the social networks of young men who have sex with men in St Petersburg, Russia. *International Journal of STD and AIDS* 2006; **17**(1): 50-6.
186. Baral S, Kizub D, Masenior NF, et al. Male sex workers in Moscow, Russia: A pilot study of demographics, substance use patterns, and prevalence of HIV-1 and sexually transmitted infections. *AIDS Care - Psychological and Socio-Medical Aspects of AIDS/HIV* 2010; **22**(1): 112-8.
187. HIV prevalence and risks among men having sex with men in Moscow and Saint Petersburg. Copenhagen Denmark: Regional Office for Europe of the World Health Organization, 2007.
188. Wirtz AL, Zelaya CE, Peryshkina A, et al. Anal human papillomavirus and HIV: A cross-sectional study among men who have sex with men in Moscow, Russia, 2012-2013. *Eurosurveillance* 2015; **20** (15) (no pagination)(21095).
189. [Research among populations most at risk to HIV]. [Serbian]. Serbia: Ministry of Health, 2012.
190. HIV integrated behavioral and biological surveillance surveys-Kosovo, 2014, people who inject drugs in Prishtina and Prizren, men who have sex with men in Prishtina. Kosovo: Kosovo survey reference group, 2014.
191. Hurtado I, Alastrue I, Pavlou M, Tasa T, Perez-Hoyos S. Increased syphilis trend among patients in an AIDS information and prevention center. *Gaceta Sanitaria* 2011; **25**(5): 368-71.
192. Hurtado I, Alastrue I, Garcia de Olalla P, Albiach D, Martin M, Perez-Hoyos S. Preventive intervention in venues for interaction used by men who have sex with men. [Spanish]. *Gaceta Sanitaria* 2010; **24**(1): 78-80.
193. Borelli S, Monn A, Meyer J, Berger U, Honegger HP, Lautenschlager S. Evaluation of a particle gel immunoassay as a screening test for syphilis. *Infection* 2009; **37**(1): 26-8.
194. Manavi K, Williams G, Newton R. The uptake of HIV and syphilis testing in a nurse-delivered service during Gay Pride events. *International Journal of STD & AIDS* 2012; **23**(12): 887-9.
195. Golden MR, Gift TL, Brewer DD, et al. Peer referral for HIV case-finding among men who have sex with men. *AIDS* 2006; **20**(15): 1961-8.
196. Mayer KH, Ducharme R, Zaller N, et al. Unprotected sex, underestimated risk, undiagnosed HIV and sexually transmitted diseases among men who have sex with men accessing testing services in a new england bathhouse. [*JAIDS Journal of Acquired Immune Deficiency Syndromes* 2011.
197. Katz DA, Golden MR, Hughes JP, Farquhar C, Stekler JD. HIV Self-testing increases HIV testing frequency in high-risk men who have sex with men: A randomized controlled trial. *Journal of Acquired Immune Deficiency Syndromes* 2018; **78**(5): 505-12.
198. Watson DL, Liao C, Ridgway J, Schneider JA. Behavioral characteristics and their association with syphilis seroprevalence among a cohort of young Black men who have sex with men. *International Journal of STD and AIDS* 2019; **30**(4): 396-403.
199. Fujimoto K, Flash CA, Kuhns LM, Kim JY, Schneider JA. Social networks as drivers of syphilis and HIV infection among young men who have sex with men. *Sexually Transmitted Infections* 2018; **94**(5): 365-71.
200. Reback CJ, Fletcher JB. Elevated HIV and STI prevalence and incidence among methamphetamine-using men who have sex with men in Los Angeles county. *AIDS Education and Prevention* 2018; **30**(4): 350-6.
201. Obafemi OA, Wendel KA, Anderson TS, et al. Rapid Syphilis Testing for Men Who Have Sex with Men in Outreach Settings: Evaluation of Test Performance and Impact on Time to Treatment. *Sexually Transmitted Diseases* 2019; **46**(3): 191-5.
202. Shannon CL, Keizur EM, Fehrenbacher A, et al. Sexually Transmitted Infection Positivity among Adolescents with or at High-Risk for Human Immunodeficiency Virus Infection in Los Angeles and New Orleans. *Sexually Transmitted Diseases* 2019; **46**(11): 737-42.
203. Pando MA, Bautista CT, Maulen S, et al. Epidemiology of human immunodeficiency virus, viral hepatitis (B and C), *Treponema pallidum*, and human T-cell lymphotropic I/II virus among men who have sex with men in Buenos Aires, Argentina. *Sexually Transmitted Diseases* 2006; **33**(5): 307-13.
204. Berini CA, Pando MA, Bautista CT, et al. HTLV-1/2 among high-risk groups in Argentina: Molecular diagnosis and prevalence of different sexual transmitted infections. *Journal of Medical Virology* 2007; **79**(12): 1914-20.
205. Segura M, Bautista CT, Marone R, et al. HIV/STI co-infections, syphilis incidence, and hepatitis B vaccination: The Buenos Aires cohort of men who have sex with men. *AIDS Care - Psychological and Socio-Medical Aspects of AIDS/HIV* 2010; **22**(12): 1459-65.

206. Avila MM, Dos Ramos Farias MS, Fazzi L, et al. High Frequency of Illegal Drug Use Influences Condom Use Among Female Transgender Sex Workers in Argentina: Impact on HIV and Syphilis Infections. *AIDS and behavior* 2017; **21**(7): 2059-68.
207. Pando MA, Balan IC, Marone R, et al. HIV and other sexually transmitted infections among men who have sex with men recruited by RDS in Buenos Aires, Argentina: High HIV and HPV infection. *PLoS ONE* 2012; **7** (6) (no pagination)(e39834).
208. Central Americans behavioural seroprevalence survey of HIV and other STIs in more vulnerable populations: sex workers, men who have sex with men and persons with HIV, Belize 2011-2012. Belize: National TB, HIV & other STIs Programme, Ministry of Health of Belize, 2012.
209. [Sexualidad masculina y VIH en Bolivia (SEMVBO)].[Spanish]. Bolivia: Ministry of Health and Sports, 2010.
210. Soares CC, Georg I, Lampe E, et al. HIV-1, HBV, HCV, HTLV, HPV-16/18, and *Treponema pallidum* infections in a sample of Brazilian men who have sex with men. *PLoS ONE* 2014; **9** (8) (no pagination)(e102676).
211. Ribeiro D, Rezende EF, Pinto VM, Pereira GFM, Miranda AE. Prevalence of and risk factors for syphilis in Brazilian armed forces conscripts. *Sexually Transmitted Infections* 2012; **88**(1): 32-4.
212. Brignol S, Dourado I, Amorim LD, Kerr LR. Vulnerability in the context of HIV and syphilis infection in a population of men who have sex with men (MSM) in Salvador, Bahia State, Brazil. *Cadernos de saude publica* 2015; **31**(5): 1035-48.
213. de Albuquerque AC, da Silva DM, Rabelo DC, et al. [Seroprevalence and factors associated with human immunodeficiency virus (HIV) and syphilis in inmates in the state of Pernambuco, Brazil][Portuguese]. *Ciencia & Saude Coletiva*; **19**(7): 2125-32.
214. Fernandes FRP, Zanini PB, Rezende GR, et al. Syphilis infection, sexual practices and bisexual behaviour among men who have sex with men and transgender women: A cross-sectional study. *Sexually Transmitted Infections* 2015; **91**(2): 142-9.
215. Hoagland B, Moreira RI, De Boni RB, et al. High pre-exposure prophylaxis uptake and early adherence among men who have sex with men and transgender women at risk for HIV Infection: The PrEP Brasil demonstration project. *Journal of the International AIDS Society* 2017; **20** (1) (no pagination)(21472).
216. Grinsztejn B, Jalil EM, Monteiro L, et al. Unveiling of HIV dynamics among transgender women: a respondent-driven sampling study in Rio de Janeiro, Brazil. *The Lancet HIV* 2017; **4**(4): e169-e76.
217. Da Motta LR, Dea Sperhackle R, De Gregori Adami A, et al. Syphilis prevalence and risk factors among young men presenting to the Brazilian Army in 2016 Results from a national survey. *Medicine (United States)* 2018; **97** (47) (no pagination)(e13309).
218. Ferreira ACG, Coelho LE, Jalil EM, et al. Transcendendo: A Cohort Study of HIV-Infected and Uninfected Transgender Women in Rio de Janeiro, Brazil. *Transgender Health* 2019; **4**(1): 107-17.
219. [Prevalencia de VIH, sífilis y comportamiento de riesgo en hombres que tienen sexo con hombres del gran area metropolitana de Costa Rica]. [Spanish]. Costa Rica: Ministry of Health, 2010.
220. Brito MO, Hodge D, Donastorg Y, Khosla S, Lerebours L, Pope Z. Risk behaviours and prevalence of sexually transmitted infections and HIV in a group of Dominican gay men, other men who have sex with men and transgender women. *BMJ open* 2015; **5**(4): e007747.
221. Hernandez I, Johnson A, Reina-Ortiz M, et al. Syphilis and HIV/Syphilis Co-infection Among Men Who Have Sex With Men (MSM) in Ecuador. *American journal of men's health* 2017; **11**(4): 823-33.
222. Jacobson JO, Sanchez-Gomez A, Montoya O, et al. A continuing HIV epidemic and differential patterns of HIV-STI risk among MSM in Quito, Ecuador: an urgent need to scale up HIV testing and prevention. *AIDS and behavior* 2014; **18**(1): 88-98.
223. Sanchez-Gomez A, Jacobson JO, Montoya O, et al. HIV, STI and Behavioral Risk Among Men Who have Sex with Men in a Setting of Elevated HIV Prevalence Along Ecuador's Pacific Coast. *AIDS and behavior* 2015; **19**(9): 1609-18.
224. Ham C, Northbrook S, Morales-Miranda S, et al. HIV and STIs among transgendered populations: Four Country Survey from Central America. Poster of the Conference on Retroviruses and Opportunistic Infections, 2015 Feb 23-26; Seattle, Washington.
225. Creswell J, Guardado ME, Lee J, et al. HIV and STI control in El Salvador: Results from an integrated behavioural survey among men who have sex with men. *Sexually Transmitted Infections* 2012; **88**(8): 633-8.
226. Lahuerta M, Sabido M, Giardina F, et al. Comparison of users of an HIV/syphilis screening community-based mobile van and traditional voluntary counselling and testing sites in Guatemala. *Sexually Transmitted Infections* 2011; **87**(2): 136-40.
227. Guyana biobehavioral surveillance survey (BBSS). Guyana: National AIDS Programme Secretariat, Ministry of Health, 2014.
228. [HAITI VIH 2014: Surveillance biologique et comportementale utilisant la méthodologie respondent driven sampling (RDS) auprès des hommes ayant des relations sexuelles avec d'autres hommes (HARSAH)]. [French]. Haiti: Organisation Haïtienne de Marketing Social pour la Santé, 2015.
229. Zalla LC, Herce ME, Edwards JK, Michel J, Weir SS. The burden of HIV among female sex workers, men who have sex with men and transgender women in Haiti: results from the 2016 Priorities for Local AIDS Control Efforts (PLACE) study. *Journal of the International AIDS Society* 2019; **22**(7): e25281.

230. Figueroa JP, Weir SS, Jones-Cooper C, et al. High HIV prevalence among men who have sex with men in Jamaica is associated with social vulnerability and other sexually transmitted infections. *West Indian Medical Journal* 2013; **62**(4): 286-91.
231. Logie CH, Wang Y, Lacombe-Duncan A, et al. Factors Associated with Syphilis Testing and a History of Syphilis Infection among a Sample of Transgender Women in Jamaica. *Sexually Transmitted Diseases* 2018; **45**(3): 158-62.
232. Pitpitan EV, Goodman-Meza D, Burgos JL, et al. Prevalence and correlates of HIV among men who have sex with men in Tijuana, Mexico. *Journal of the International AIDS Society* 2015; **18** (1) (no pagination)(19304).
233. Martinez Vizcaino G, Belaunzaran-Zamudio P, Galicia Juarez V. Syphilis prevalence among men who have sex with men attending community-based HIV testing clinic in the city of Guadalajara, Mexico (2016 to 2018). *Journal of the International AIDS Society Conference: HIV and Hepatitis in the Americas* 2019; **22**(Supplement 2).
234. Hakre S, Arteaga GB, Nunez AE, et al. Prevalence of HIV, syphilis, and other sexually transmitted infections among MSM from three cities in Panama. *Journal of urban health : bulletin of the New York Academy of Medicine* 2014; **91**(4): 793-808.
235. Sanchez J, Lama JR, Kusunoki L, et al. HIV-1, sexually transmitted infections, and sexual behavior trends among men who have sex with men in Lima, Peru. *Journal of Acquired Immune Deficiency Syndromes* 2007; **44**(5): 578-85.
236. Clark JL, Caceres CF, Lescano AG, et al. Prevalence of same-sex sexual behavior and associated characteristics among low-income urban males in Peru. *PLoS ONE* 2007; **2** (8) (no pagination)(e778).
237. Caceres CF, Konda KA, Salazar X, et al. New populations at high risk of HIV/STIs in low-income, urban coastal Peru. *AIDS Behav* 2008; **12**(4): 544-51.
238. Lama JR, Lucchetti A, Suarez L, et al. Association of herpes simplex virus type 2 infection and syphilis with human immunodeficiency virus infection among men who have sex with men in Peru. *Journal of Infectious Diseases* 2006; **194**(10): 1459-66.
239. Clark JL, Konda KA, Munayco CV, et al. Prevalence of HIV, herpes simplex virus-2, and syphilis in male sex partners of pregnant women in Peru. *BMC Public Health* 2008; **8** (no pagination)(65).
240. Park H, Konda KA, Roberts CP, et al. Risk factors associated with incident syphilis in a cohort of high-risk men in peru. *PLoS ONE* 2016; **11** (9) (no pagination)(e0162156).
241. Snowden JM, Konda KA, Leon SR, et al. Recent syphilis infection prevalence and risk factors among male low-income populations in coastal Peruvian cities. *Sexually Transmitted Diseases* 2010; **37**(2): 75-80.
242. Blas MM, Alva IE, Cabello R, et al. Internet as a tool to access high-risk men who have sex with men from a resource-constrained setting: A study from Peru. *Sexually Transmitted Infections* 2007; **83**(7): 567-70.
243. Perez-Brumer AG, Konda KA, Salvatierra HJ, et al. Prevalence of HIV, STIs, and Risk Behaviors in a Cross-Sectional Community- and Clinic-Based Sample of Men Who Have Sex with Men (MSM) in Lima, Peru. *PLoS ONE* 2013; **8** (4) (no pagination)(e59072).
244. Silva-Santisteban A, Raymond HF, Salazar X, et al. Understanding the HIV/AIDS epidemic in transgender women of Lima, Peru: results from a sero-epidemiologic study using respondent driven sampling. *AIDS and behavior* 2012; **16**(4): 872-81.
245. Pizzicato LN, Vagenas P, Gonzales P, et al. Active syphilis and its association with HIV and sexual risk behaviours in a multicity sample of men who have sex with men and transgender women in Peru. *Sexual Health* 2017; **14**(4): 304-12.
246. Galea JT, Kinsler JJ, Galan DB, et al. Factors associated with visible anogenital warts among HIV-uninfected Peruvian men who have sex with men and transwomen: A cross-sectional study. *Sexually Transmitted Diseases* 2015; **42**(4): 202-7.
247. Blair C, Passaro RC, Segura ER, et al. Sexual network characteristics of men who have sex with men with syphilis and/or gonorrhoea/chlamydia in Lima, Peru: Network patterns as roadmaps for STI prevention interventions. *Sexually Transmitted Infections* 2019.
248. Allan-Blitz LT, Herrera MC, Calvo GM, et al. Venue-Based HIV-Testing: An Effective Screening Strategy for High-Risk Populations in Lima, Peru. *AIDS and behavior* 2019; **23**(4): 813-9.
249. Results from the HIV biological and behavioural surveillance in the Republic of Armenia 2010-2011. Armenia: Ministry of Health, Republic of Armenia, 2011.
250. Results from the HIV biological and behavioural surveillance in the Republic of Armenia 2012. Yerevan, Armenia: Ministry of Health, Republic of Armenia, 2013.
251. Results from the HIV biological and behavioural surveillance in the Republic of Armenia 2014. Yerevan, Armenia: Ministry of Health, Republic of Armenia, 2015.
252. Integrated biological-behavioral surveillance survey among people who inject drugs, female sex workers and men who have sex with men in Yerevan, Gyumri and Vanadzor, Armenia-2016. Armenia: Ministry of Health, Republic of Armenia, 2016.
253. Integrated biological-behavioural surveillance survey among people who inject drugs, female sex workers, men who have sex with men and transgender persons 2018. Yerevan, Armenia: Ministry of Health, Republic of Armenia, 2018.
254. Prevalence of HIV, hepatitis and syphilis, and behavioural risk factors among most-at-risk groups in the Republic of Azerbaijan. Baku, Azerbaijan: Ministry of Health of the Republic of Azerbaijan, 2008.

255. Report on the integrated bio-behavioural surveillance surveys among key populations in Azerbaijan, 2015. Azerbaijan: Ministry of Health of the Republic of Azerbaijan, 2015.
256. Prevention of HIV/AIDS and sexually transmitted infections among commercial sex workers, men who have sex with men and their clients. Georgia: Tanadgoma, Scientific Research Institute of Dermatology and Venerology, AIDS and Clinical Immunology Research Center, 2005.
257. Characteristics, high-risk behaviors and knowledge of STI/HIV/AIDS, and prevalence of HIV, syphilis and hepatitis among MSM in Tbilisi, Georgia: 2007. Georgia: Save the Children, Tanadgoma, AIDS and Clinical Immunology Research Center, 2008.
258. Bio-behavioral surveillance survey among men who have sex with men in Tbilisi, Georgia (2010). Georgia: Curatio International Foundation, Tanadgoma, 2010.
259. HIV risk and prevention behaviour among men who have sex with men in Tbilisi, Georgia, bio-behavioural surveillance survey in 2012. Georgia: Curatio International Foundation, Tanadgoma, 2013.
260. HIV risk and prevention behavior among men who have sex with men in Tbilisi and Batumi, Georgia, bio-behavioural surveillance survey in 2015. Georgia: Curatio International Foundation, Tanadgoma, 2015.
261. HIV risk and prevention behavior among men who have sex with men in Tbilisi and Batumi and Kutaisi, Georgia, bio-behavioural surveillance survey in 2018. Georgia: Curatio International Foundation, Tanadgoma, 2018.
262. Johnston LG, Alami K, Rhilani MHE, et al. HIV, syphilis and sexual risk behaviours among men who have sex with men in Agadir and Marrakesh, Morocco. *Sexually Transmitted Infections* 2013; **89**(SUPPL. 3): iii45-iii8.
263. Hakim AJ, Coy K, Badman SG, et al. One size does not fit all: HIV prevalence and correlates of risk for men who have sex with men, transgender women in multiple cities in Papua New Guinea. *BMC Public Health* 2019; **19**(1): 623.
264. An integrated biological and behavioral surveillance survey (IBBSS) among female sex workers and men who have sex with men in Solomon Islands. Solomon Islands: HIV/STI Division of the Ministry of Health and Medical Services, 2018.
265. Second Generation Surveillance Survey of MSM in Tonga 2008. Tonga: The Tonga Ministry of Health, 2008.
266. Veronese V, van Gemert C, Bulu S, et al. Sexually transmitted infections among transgender people and men who have sex with men in Port Vila, Vanuatu. *Western Pac Surveill Response J* 2015; **6**(1): 55-9.
267. Kendall C, Kerr LRFS, Mota RMS, et al. Population size, HIV, and behavior among MSM in Luanda, Angola: Challenges and findings in the first ever HIV and syphilis biological and behavioral survey. *Journal of Acquired Immune Deficiency Syndromes* 2014; **66**(5): 544-51.
268. 2012 Mapping, size estimation & behavioral and biological surveillance survey (BBSS) of HIV/STI among select high-risk sub-populations in Botswana. Botswana: Ministry of Health, 2013.
269. Goodman SH, Grosso AL, Ketende SC, et al. Examining the Correlates of Sexually Transmitted Infection Testing among Men Who Have Sex with Men in Ouagadougou and Bobo-Dioulasso, Burkina Faso. *Sexually Transmitted Diseases* 2016; **43**(5): 302-9.
270. Park JN, Papworth E, Kassegne S, et al. HIV prevalence and factors associated with HIV infection among men who have sex with men in Cameroon. *Journal of the International AIDS Society* 2013; **16** Suppl 3: 18752.
271. [Etude biologique et comportementale des IST, du VIH et du sida chez les Hommes ayant des rapports Sexuels avec des Hommes des villes d'Abidjan, Agboville, Bouaké, Gagnoa, et Yamoussoukro]. [French]. Cote d'Ivoire: Ministry of Health and Public Hygiene, 2016.
272. Mason K, Ketende S, Peitzmeier S, et al. A cross-sectional analysis of population demographics, HIV knowledge and risk behaviors, and prevalence and associations of HIV among men who have sex with men in the Gambia. *AIDS Res Hum Retroviruses* 2013; **29**(12): 1547-52.
273. Sanders EJ, Okuku HS, Smith AD, et al. High HIV-1 incidence, correlates of HIV-1 acquisition, and high viral loads following seroconversion among MSM. *Aids* 2013; **27**(3): 437-46.
274. Muraguri N, Tun W, Okal J, et al. HIV and STI prevalence and risk factors among male sex workers and other men who have sex with men in Nairobi, Kenya. *Journal of Acquired Immune Deficiency Syndromes* 2015; **68**(1): 91-6.
275. Integrated bio-behavioural surveillance survey (IBBSS2) report for key populations in Lesotho. Lesotho: Lesotho Ministry of Health, 2019.
276. Integrated bio-behavioural surveillance survey (IBBSS) among MARPs in Liberia. Liberia: Ministry of Health and Social Welfare, 2013.
277. Wirtz AL, Jumbe V, Trapence G, et al. HIV among men who have sex with men in Malawi: elucidating HIV prevalence and correlates of infection to inform HIV prevention. *Journal of the International AIDS Society* 2013; **16** Suppl 3: 18742.
278. Wirtz AL, Trapence G, Kamba D, et al. Geographical disparities in HIV prevalence and care among men who have sex with men in Malawi: results from a multisite cross-sectional survey. *The Lancet HIV* 2017; **4**(6): e260-e9.
279. Wirtz AL, Trapence G, Gama V, et al. HIV prevalence and sociobehavioral characteristics among men who have sex with men across seven sites in Malawi. Malawi: Johns Hopkins University and the Center for Development of People, 2014.
280. Integrated behavioral and biological surveillance survey among men who have sex with men. Mauritius: AIDS Unit, Ministry of Health and Quality of Life, 2010.
281. Integrated biological-behavioral surveillance survey and population size estimation among transgender persons in Mauritius-2017. Mauritius: Prevention information et Lutte contre le sida (PILS), 2017.

282. Merrigan M, Azeez A, Afolabi B, et al. HIV prevalence and risk behaviours among men having sex with men in Nigeria. *Sexually Transmitted Infections* 2011; **87**(1): 65-70.
283. Wade AS, Kane CT, Niang Diallo PA, et al. HIV infection and sexually transmitted infections among men who have sex with men in Senegal. *Aids* 2005; **19**(18): 2133-40.
284. Wade AS, Larmarange J, Diop AK, et al. Reduction in risk-taking behaviors among MSM in Senegal between 2004 and 2007 and prevalence of HIV and other STIs. ELIHoS Project, ANRS 12139. *AIDS Care - Psychological and Socio-Medical Aspects of AIDS/HIV* 2010; **22**(4): 409-14.
285. Johnston LG, Holman A, Dahoma M, et al. HIV risk and the overlap of injecting drug use and high-risk sexual behaviours among men who have sex with men in Zanzibar (Unguja), Tanzania. *International Journal of Drug Policy* 2010; **21**(6): 485-92.
286. Ross MW, Nyoni J, Ahaneku HO, Mbwambo J, McClelland RS, McCurdy SA. High HIV seroprevalence, rectal STIs and risky sexual behaviour in men who have sex with men in Dar es Salaam and Tanga, Tanzania. *BMJ Open* 2014; **4** (8) (no pagination)(e006175).
287. Mmbaga EJ, Moen K, Leyna GH, Mpembeni R, Leshabari MT. HIV Prevalence and Associated Risk Factors Among Men Who Have Sex With Men in Dar es Salaam, Tanzania. *Journal of acquired immune deficiency syndromes (1999)* 2018; **77**(3): 243-9.
288. Ruisenor-Escudero H, Lyons C, Ketende S, et al. Consistent Condom Use Among Men Who Have Sex With Men in Lome and Kara, Togo. *AIDS Research & Human Retroviruses* 2019: 03.
289. Ekouevi DK, Bitty-Anderson AM, Gbeasor-Komlanvi FA, et al. Low prevalence of syphilis infection among key populations in Togo in 2017: a national cross-sectional survey. *Archives of Public Health*; **77**: 39.
290. Kim EJ, Hladik W, Barker J, et al. Sexually transmitted infections associated with alcohol use and HIV infection among men who have sex with men in Kampala, Uganda. *Sexually Transmitted Infections* 2016; **92**(3): 240-5.
291. Kelsey JL, Whittemore AS, Evans AS, Thompson WD. *Methods in Observational Epidemiology*. 2nd ed. New York, NY: Oxford University Press; 1996.
